# Supplementary material for: Diastereoselective trifunctionalization of pyridinium salts to access structurally crowded azaheteropolycycles
Source: Royal Society of Chemistry journal article supplement (doi:10.1039/d1cc03478b), 2021-01-01

Supporting Information

Diastereoselective trifunctionalization of pyridinium salts to access  
structurally crowded azaheteropolycycles

Zhaohui Cui, Kuan Zhang, Lijie Gu, Zhanwei Bu,\* Junwei Zhao,\* Qilin Wang\*

College of Chemistry and Chemical Engineering, Henan University, Kaifeng 475004, China

E-mail: buzhanwei@henu.edu.cn, zhaojunwei@henu.edu.cn, wangqilin@henu.edu.cn

**Table of Contents**

|                                                          |     |
|----------------------------------------------------------|-----|
| 1. General methods.....                                  | S2  |
| 2. Experimental data for the formation of <b>3</b> ..... | S2  |
| 3. Scalable preparation of <b>3a</b> .....               | S18 |
| 4. Late-stage modifications.....                         | S18 |
| 5. Crystal structures.....                               | S23 |
| 6. NMR spectra.....                                      | S30 |

## 1. General methods

NMR spectra were recorded with tetramethylsilane as the internal standard. For compounds **3o**, **7** and **10**,  $^1\text{H}$  NMR spectra were recorded at 400 MHz, and  $^{13}\text{C}$  NMR spectra were recorded at 100 MHz (JNM-ECZ 400S/L1). For compounds **3u-z**, **3ab** and **3ab'**,  $^1\text{H}$  NMR spectra were recorded at 300 MHz, and  $^{13}\text{C}$  NMR spectra were recorded at 75 MHz (Bruker Avance). For other compounds,  $^1\text{H}$  NMR spectra were recorded at 400 MHz, and  $^{13}\text{C}$  NMR spectra were recorded at 100 MHz (Bruker Avance).  $^1\text{H}$  NMR chemical shifts ( $\delta$ ) are reported in ppm relative to tetramethylsilane (TMS) with the solvent signal as the internal standard ( $\text{CDCl}_3$  at 7.26 ppm,  $(\text{CD}_3)_2\text{SO}$  at 2.50 ppm).  $^{13}\text{C}$  NMR chemical shifts are reported in ppm from tetramethylsilane (TMS) with the solvent resonance as the internal standard ( $\text{CDCl}_3$  at 77.00 ppm,  $(\text{CD}_3)_2\text{SO}$  at 39.52 ppm). Data are given as: s (singlet), d (doublet), t (triplet), q (quartet), dd (double of doublet), br (broad) or m (multiplets), coupling constants (Hz) and integration. Flash column chromatography was carried out using silica gel eluting with ethyl acetate and petroleum ether. High resolution mass spectra were obtained with the Q-TOF-Premier mass spectrometer. Reactions were monitored by TLC and visualized with ultraviolet light. IR spectra were recorded on a Thermo Fisher Nicolet Avatar 360 FTIR spectrometer on a KBr beam splitter. All the solvents were used directly without any purification.

## 2. Experimental data for the formation of **3**

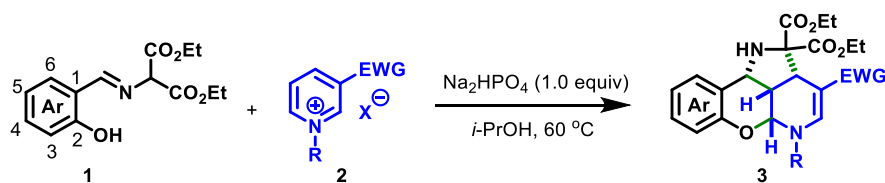

**General procedure:** To a 5.0 mL vial were successively added azomethine ylides **1** (0.36 mmol, 1.8 equiv), pyridinium salts **2** (0.20 mmol),  $\text{Na}_2\text{HPO}_4$  (28.4 mg, 0.2 mmol) and 1.0 mL of *i*-PrOH. The resulting mixture was stirred at 60 °C for 42-48 h, and then the reaction mixture was directly subjected to flash column chromatography on silica gel (petroleum ether/ ethyl acetate) to afford the corresponding products **3**. Notably, when methanol was employed as the solvent, **3a** was afforded in 51% yield together with a 9% yield of **4**. For the preparation of **3aa**, slightly modified conditions were used and the detailed conditions were: 0.15 mmol of **1a**, 2.5 equivalents of *N*-benzyl quinolinium salt, 2.0 equivalents of  $\text{Na}_2\text{HPO}_4$  and 1.0 mL of ethanol at 60 °C for 2 h.

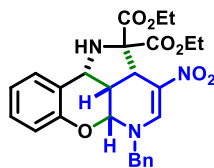

Diethyl 5-benzyl-3-nitro-hexahydro-2*H*-6-oxa-1,5-diazaaceanthrylene-2,2-dicarboxylate (**3a**)

Yellow solid obtained by column chromatography (petroleum ether/ethyl acetate = 3:1 to 1:1); 80.0 mg, 81% yield; dr > 20:1; reaction time = 48 h; mp 126.3-126.8 °C; <sup>1</sup>H NMR (400 MHz, CDCl<sub>3</sub>) δ 8.26 (s, 1H), 7.38-7.33 (m, 3H), 7.28-7.20 (m, 4H), 7.05 (t, *J* = 8.0 Hz, 1H), 6.87 (d, *J* = 8.0 Hz, 1H), 4.89 (d, *J* = 8.0 Hz, 1H), 4.74 (d, *J* = 16.0 Hz, 1H), 4.60 (dd, *J*<sub>1</sub> = 4.0 Hz, *J*<sub>2</sub> = 12.0 Hz, 2H), 4.45 (d, *J* = 12.0 Hz, 1H), 4.29-4.21 (m, 2H), 4.09-4.01 (m, 1H), 3.89-3.81 (m, 1H), 3.08-3.02 (m, 1H), 2.83 (br, 1H), 1.25 (t, *J* = 8.0 Hz, 3H), 1.03 (t, *J* = 8.0 Hz, 3H); <sup>13</sup>C NMR (100 MHz, CDCl<sub>3</sub>) δ 170.9, 168.5, 155.0, 142.3, 134.8, 129.0, 129.0, 128.6, 128.5, 128.1, 128.0, 123.9, 123.8, 117.5, 82.8, 74.5, 62.5, 61.5, 57.7, 57.7, 42.3, 41.3, 13.8, 13.3. IR (KBr) ν 3432, 2923, 1735, 1637, 1195, 762 cm<sup>-1</sup>. HRMS (ESI) calcd for C<sub>26</sub>H<sub>28</sub>N<sub>3</sub>O<sub>7</sub> [M+H]<sup>+</sup>: 494.1922, found: 494.1921.

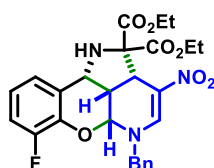

Diethyl 5-benzyl-7-fluoro-3-nitro-hexahydro-2*H*-6-oxa-1,5-diazaaceanthrylene-2,2-dicarboxylate (**3b**)

Yellow solid obtained by column chromatography (petroleum ether/ethyl acetate = 3:1 to 1:1); 72.1 mg, 71% yield; dr > 20:1; reaction time = 42 h; mp 150.1-150.5 °C; <sup>1</sup>H NMR (400 MHz, CDCl<sub>3</sub>) δ 8.25 (s, 1H), 7.38-7.28 (m, 5H), 7.05-6.96 (m, 3H), 4.92 (d, *J* = 8.0 Hz, 1H), 4.77 (d, *J* = 12.0 Hz, 1H), 4.63 (d, *J* = 8.0 Hz, 1H), 4.61 (s, 1H), 4.43 (d, *J* = 12.0 Hz, 1H), 4.30-4.21 (m, 2H), 4.10-4.02 (m, 1H), 3.95-3.87 (m, 1H), 3.11-3.05 (m, 1H), 2.87 (br, 1H), 1.25 (t, *J* = 8.0 Hz, 3H), 1.05 (t, *J* = 8.0 Hz, 3H); <sup>13</sup>C NMR (100 MHz, CDCl<sub>3</sub>) δ 170.7, 168.5, 151.5 (d, *J* = 247.0 Hz, 1C), 142.7 (d, *J* = 12.0 Hz, 1C), 142.1, 134.5, 130.7, 129.1, 128.6, 128.3, 124.1, 123.6 (d, *J* = 6.0 Hz, 1C), 123.5 (d, *J* = 3.0 Hz, 1C), 115.8 (d, *J* = 18.0 Hz, 1C), 83.2, 74.6, 62.5, 61.7, 57.7, 57.3, 42.2, 41.1, 13.7, 13.3; <sup>19</sup>F NMR (375 MHz, CDCl<sub>3</sub>) δ -135.2. IR (KBr) ν 3357, 2929, 1735, 1640, 1246, 1210, 745 cm<sup>-1</sup>. HRMS (ESI) calcd for C<sub>26</sub>H<sub>27</sub>FN<sub>3</sub>O<sub>7</sub> [M+H]<sup>+</sup>: 512.1828, found: 512.1828.

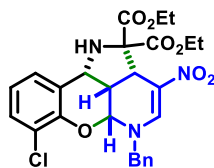

Diethyl 5-benzyl-7-chloro-3-nitro-hexahydro-2H-6-oxa-1,5-diazaaceanthrylene-2,2-dicarboxylate  
(3c)

Yellow solid obtained by column chromatography (petroleum ether/ethyl acetate = 3:1 to 1:1); 84.6 mg, 80% yield; dr > 20:1; reaction time = 48 h; mp 152.3-152.9 °C; <sup>1</sup>H NMR (400 MHz, CDCl<sub>3</sub>) δ 8.26 (s, 1H), 7.38-7.28 (m, 6H), 7.16 (d, *J* = 8.0 Hz, 1H), 6.99 (t, *J* = 8.0 Hz, 1H), 4.92 (d, *J* = 8.0 Hz, 1H), 4.81 (d, *J* = 16.0 Hz, 1H), 4.64 (d, *J* = 16.0 Hz, 1H), 4.56 (d, *J* = 4.0 Hz, 1H), 4.42 (dd, *J*<sub>1</sub> = 4.0 Hz, *J*<sub>2</sub> = 8.0 Hz, 1H), 4.31-4.19 (m, 2H), 4.15-4.07 (m, 1H), 3.95-3.86 (m, 1H), 3.11-3.05 (m, 1H), 2.84 (br, 1H), 1.28-1.24 (m, 3H), 1.09-1.04 (m, 3H); <sup>13</sup>C NMR (100 MHz, CDCl<sub>3</sub>) δ 170.7, 168.4, 150.8, 142.3, 134.4, 129.9, 129.4, 129.1, 128.6, 128.3, 127.0, 124.1, 122.8, 83.2, 74.5, 62.6, 61.8, 57.7, 57.5, 42.3, 41.1, 13.8, 13.3, one carbon missing in the aromatic region. IR (KBr) ν 3472, 3416, 1987, 1744, 1634, 1297, 1205, 742 cm<sup>-1</sup>. HRMS (ESI) calcd for C<sub>26</sub>H<sub>27</sub>ClN<sub>3</sub>O<sub>7</sub> [M+H]<sup>+</sup>: 528.1532, found: 528.1531.

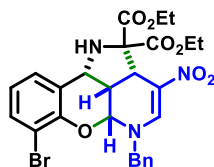

Diethyl 5-benzyl-7-bromo-3-nitro-hexahydro-2H-6-oxa-1,5-diazaaceanthrylene-2,2-dicarboxylate  
(3d)

Yellow solid obtained by column chromatography (petroleum ether/ethyl acetate = 3:1 to 1:1); 73.5 mg, 64% yield; dr > 20:1; reaction time = 48 h; mp 158.2-158.8 °C; <sup>1</sup>H NMR (400 MHz, CDCl<sub>3</sub>) δ 8.25 (s, 1H), 7.44 (d, *J* = 8.0 Hz, 1H), 7.37-7.30 (m, 5H), 7.19 (d, *J* = 8.0 Hz, 1H), 6.93 (t, *J* = 8.0 Hz, 1H), 4.91 (d, *J* = 12.0 Hz, 1H), 4.83 (d, *J* = 12.0 Hz, 1H), 4.63 (d, *J* = 16.0 Hz, 1H), 4.53 (d, *J* = 4.0 Hz, 1H), 4.41 (d, *J* = 8.0 Hz, 1H), 4.30-4.18 (m, 2H), 4.15-4.07 (m, 1H), 3.94-3.86 (m, 1H), 3.08-3.02 (m, 1H), 2.84 (br, 1H), 1.25 (t, *J* = 8.0 Hz, 3H), 1.06 (t, *J* = 8.0 Hz, 3H); <sup>13</sup>C NMR (100 MHz, CDCl<sub>3</sub>) δ 170.8, 168.3, 151.8, 142.3, 134.4, 132.4, 130.0, 129.1, 128.7, 128.3, 127.7, 124.8, 124.1, 111.8, 83.2, 74.5, 62.6, 61.8, 57.9, 57.4, 42.3, 41.2, 13.8, 13.4. IR (KBr) ν 3470, 3416, 1931, 1744, 1635, 1296, 1204, 740 cm<sup>-1</sup>. HRMS (ESI) calcd for C<sub>26</sub>H<sub>27</sub>BrN<sub>3</sub>O<sub>7</sub>

[M+H]<sup>+</sup>: 572.1027, found: 572.1028.

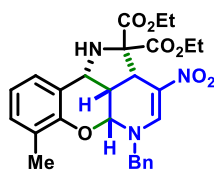

Diethyl 5-benzyl-7-methyl-3-nitro-hexahydro-2*H*-6-oxa-1,5-diazaaceanthrylene-2,2-dicarboxylate  
(**3e**)

Yellow solid obtained by column chromatography (petroleum ether/ethyl acetate = 3:1 to 1:1); 71.8 mg, 71% yield; dr > 20:1; reaction time = 48 h; mp 78.6-79.3 °C; <sup>1</sup>H NMR (400 MHz, CDCl<sub>3</sub>) δ 8.26 (s, 1H), 7.39-7.33 (m, 3H), 7.26-7.24 (m, 2H), 7.08 (d, *J* = 8.0 Hz, 2H), 6.94 (t, *J* = 8.0 Hz, 1H), 4.89 (d, *J* = 8.0 Hz, 1H), 4.76 (d, *J* = 12.0 Hz, 1H), 4.62 (d, *J* = 16.0 Hz, 1H), 4.57 (d, *J* = 4.0 Hz, 1H), 4.47 (d, *J* = 12.0 Hz, 1H), 4.31-4.23 (m, 2H), 4.09-4.03 (m, 1H), 3.90-3.82 (m, 1H), 3.07-3.01 (m, 1H), 2.83 (s, 1H), 2.15 (s, 3H), 1.27 (t, *J* = 8.0 Hz, 3H), 1.05 (t, *J* = 8.0 Hz, 3H); <sup>13</sup>C NMR (100 MHz, CDCl<sub>3</sub>) δ 171.0, 168.5, 153.3, 142.4, 134.9, 130.4, 129.2, 128.7, 127.8, 126.8, 126.2, 124.1, 123.3, 83.2, 74.6, 62.6, 61.5, 58.0, 57.9, 42.3, 41.5, 15.1, 13.8, 13.4, one carbon missing in the aromatic region. IR (KBr) ν 3417, 2982, 1735, 1631, 1300, 1198, 747 cm<sup>-1</sup>. HRMS (ESI) calcd for C<sub>27</sub>H<sub>30</sub>N<sub>3</sub>O<sub>7</sub> [M+H]<sup>+</sup>: 508.2078, found: 503.2078.

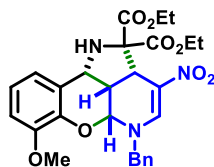

Diethyl

5-benzyl-7-methoxy-3-nitro-hexahydro-2*H*-6-oxa-1,5-diazaaceanthrylene-2,2-dicarboxylate (**3f**)

Yellow solid obtained by column chromatography (petroleum ether/ethyl acetate = 3:1 to 1:1); 99.6 mg, 95% yield; dr > 20:1; reaction time = 48 h; mp 85.2-85.9 °C; <sup>1</sup>H NMR (400 MHz, CDCl<sub>3</sub>) δ 8.23 (s, 1H), 7.36-7.29 (m, 5H), 6.98 (t, *J* = 8.0 Hz, 1H), 6.85 (t, *J* = 8.0 Hz, 2H), 4.84 (d, *J* = 8.0 Hz, 1H), 4.76 (d, *J* = 16.0 Hz, 1H), 4.59 (d, *J* = 16.0 Hz, 1H), 4.56 (d, *J* = 8.0 Hz, 1H), 4.46 (d, *J* = 12.0 Hz, 1H), 4.27-4.22 (m, 2H), 4.04-4.00 (m, 1H), 3.92-3.87 (m, 1H), 3.84 (s, 3H), 3.05-2.99 (m, 1H), 2.81 (br, 1H), 1.25 (t, *J* = 8.0 Hz, 3H), 1.01 (t, *J* = 8.0 Hz, 3H); <sup>13</sup>C NMR (100 MHz, CDCl<sub>3</sub>) δ 170.9, 168.4, 149.1, 144.1, 142.5, 134.8, 129.1, 129.0, 128.5, 128.3, 123.8, 123.6, 120.1, 111.9, 83.1, 74.6, 62.5, 61.7, 57.7, 57.6, 56.0, 42.3, 41.5, 13.8, 13.3. IR (KBr) ν 3422, 2933, 1726, 1642,

1318, 1201, 728  $\text{cm}^{-1}$ . HRMS (ESI) calcd for  $\text{C}_{27}\text{H}_{30}\text{N}_3\text{O}_8$   $[\text{M}+\text{H}]^+$ : 524.2027, found: 524.2029.

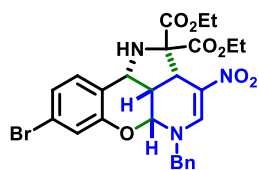

Diethyl 5-benzyl-8-bromo-3-nitro-hexahydro-2H-6-oxa-1,5-diazaaceanthrylene-2,2-dicarboxylate  
(3g)

Yellow solid obtained by column chromatography (petroleum ether/ethyl acetate = 3:1 to 1:1); 80.3 mg, 70% yield; dr > 20:1; reaction time = 48 h; mp 176.2-176.7  $^{\circ}\text{C}$ ;  $^1\text{H}$  NMR (400 MHz,  $\text{CDCl}_3$ )  $\delta$  8.23 (s, 1H), 7.40-7.33 (m, 3H), 7.26 (d,  $J$  = 8.0 Hz, 2H), 7.18 (dd,  $J_1$  = 4.0 Hz,  $J_2$  = 8.0 Hz, 1H), 7.12 (d,  $J$  = 8.0 Hz, 1H), 7.02 (d,  $J$  = 4.0 Hz, 1H), 4.87 (d,  $J$  = 8.0 Hz, 1H), 4.71 (d,  $J$  = 16.0 Hz, 1H), 4.60 (d,  $J$  = 16.0 Hz, 1H), 4.58 (s, 1H), 4.41 (d,  $J$  = 12.0 Hz, 1H), 4.27-4.22 (m, 2H), 4.09-4.01 (m, 1H), 3.91-3.83 (m, 1H), 3.08-3.02 (m, 1H), 2.82 (br, 1H), 1.25 (t,  $J$  = 8.0 Hz, 3H), 1.05 (t,  $J$  = 8.0 Hz, 3H);  $^{13}\text{C}$  NMR (100 MHz,  $\text{CDCl}_3$ )  $\delta$  170.8, 168.6, 155.9, 142.1, 134.7, 130.0, 129.2, 128.8, 128.2, 127.3, 127.1, 124.3, 122.2, 121.0, 83.3, 74.7, 62.7, 61.8, 57.9, 57.4, 42.4, 41.2, 13.9, 13.5. IR (KBr)  $\nu$  3473, 3416, 2927, 1732, 1636, 1301, 1195, 754  $\text{cm}^{-1}$ . HRMS (ESI) calcd for  $\text{C}_{26}\text{H}_{27}\text{BrN}_3\text{O}_7$   $[\text{M}+\text{H}]^+$ : 572.1027, found: 572.1030.

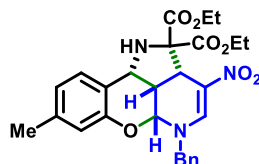

Diethyl 5-benzyl-8-methyl-3-nitro-hexahydro-2H-6-oxa-1,5-diazaaceanthrylene-2,2-dicarboxylate  
(3h)

Yellow solid obtained by column chromatography (petroleum ether/ethyl acetate = 3:1 to 1:1); 93.7 mg, 92% yield; dr > 20:1; reaction time = 48 h; mp 182.3-182.6  $^{\circ}\text{C}$ ;  $^1\text{H}$  NMR (400 MHz,  $\text{CDCl}_3$ )  $\delta$  8.24 (s, 1H), 7.39-7.31 (m, 3H), 7.25 (d,  $J$  = 8.0 Hz, 2H), 7.12 (d,  $J$  = 8.0 Hz, 1H), 6.85 (d,  $J$  = 8.0 Hz, 1H), 6.69 (s, 1H), 4.86 (d,  $J$  = 8.0 Hz, 1H), 4.73 (d,  $J$  = 16.0 Hz, 1H), 4.59 (d,  $J$  = 16.0 Hz, 1H), 4.57 (s, 1H), 4.45 (d,  $J$  = 8.0 Hz, 1H), 4.31-4.19 (m, 2H), 4.09-4.01 (m, 1H), 3.91-3.83 (m, 1H), 3.05-2.99 (m, 1H), 2.81 (br, 1H), 2.31 (s, 3H), 1.26 (t,  $J$  = 8.0 Hz, 3H), 1.04 (t,  $J$  = 8.0 Hz, 3H);  $^{13}\text{C}$  NMR (100 MHz,  $\text{CDCl}_3$ )  $\delta$  170.9, 168.6, 155.0, 142.3, 139.3, 134.8, 129.0, 128.6, 128.3, 128.0, 125.1, 124.6, 123.9, 118.0, 82.9, 74.6, 62.4, 61.6, 57.7, 57.5, 42.2, 41.3, 21.2,

13.8, 13.3. IR (KBr)  $\nu$  3431, 3324, 1735, 1635, 1305, 1263, 757  $\text{cm}^{-1}$ . HRMS (ESI) calcd for  $\text{C}_{27}\text{H}_{30}\text{N}_3\text{O}_7$   $[\text{M}+\text{H}]^+$ : 508.2078, found: 508.2078.

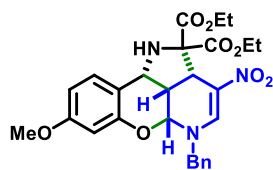

Diethyl

5-benzyl-8-methoxy-3-nitro-hexahydro-2H-6-oxa-1,5-diazaaceanthrylene-2,2-dicarboxylate (**3i**)

Yellow solid obtained by column chromatography (petroleum ether/ethyl acetate = 3:1 to 1:1); 80.3 mg, 77% yield; dr > 20:1; reaction time = 48 h; mp 97.2-97.9  $^{\circ}\text{C}$ ;  $^1\text{H}$  NMR (400 MHz,  $\text{CDCl}_3$ )  $\delta$  8.24 (s, 1H), 7.34 (d,  $J = 4.0$  Hz, 3H), 7.27 (d,  $J = 4.0$  Hz, 2H), 7.15-7.12 (m, 1H), 6.59 (s, 1H), 6.40 (d,  $J = 4.0$  Hz, 1H), 4.85 (t,  $J = 4.0$  Hz, 1H), 4.72 (dd,  $J_1 = 4.0$  Hz,  $J_2 = 16.0$  Hz, 1H), 4.61 (d,  $J = 12.0$  Hz, 2H), 4.42 (t,  $J = 8.0$  Hz, 1H), 4.25-4.21 (m, 2H), 4.06-4.02 (m, 1H), 3.90-3.84 (m, 1H), 3.76 (d,  $J = 8.0$  Hz, 3H), 3.01 (t,  $J = 8.0$  Hz, 1H), 2.81 (s, 1H), 1.27-1.22 (m, 3H), 1.07-1.02 (m, 3H);  $^{13}\text{C}$  NMR (100 MHz,  $\text{CDCl}_3$ )  $\delta$  170.8, 168.6, 160.2, 156.0, 142.2, 134.8, 129.1, 128.9, 128.4, 128.0, 123.9, 120.2, 109.4, 103.1, 82.9, 74.4, 62.3, 61.5, 57.7, 57.2, 55.2, 42.1, 41.1, 13.7, 13.3. IR (KBr)  $\nu$  3417, 2933, 1732, 1633, 1302, 1265, 754  $\text{cm}^{-1}$ . HRMS (ESI) calcd for  $\text{C}_{27}\text{H}_{30}\text{N}_3\text{O}_8$   $[\text{M}+\text{H}]^+$ : 524.2027, found: 524.2028.

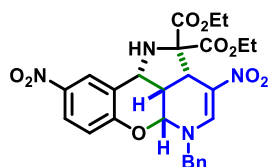

Diethyl 5-benzyl-3,9-dinitro-hexahydro-2H-6-oxa-1,5-diazaaceanthrylene-2,2-dicarboxylate (**3j**)

Yellow solid obtained by column chromatography (petroleum ether/ethyl acetate = 3:1 to 1:1); 65.2 mg, 61% yield; dr > 20:1; reaction time = 48 h; mp 172.1-172.6  $^{\circ}\text{C}$ ;  $^1\text{H}$  NMR (400 MHz,  $\text{CDCl}_3$ )  $\delta$  8.24 (s, 1H), 8.16 (d,  $J = 4.0$  Hz, 1H), 8.11 (dd,  $J_1 = 4.0$  Hz,  $J_2 = 8.0$  Hz, 1H), 7.41-7.36 (m, 3H), 7.28 (d,  $J = 4.0$  Hz, 2H), 6.92 (d,  $J = 8.0$  Hz, 1H), 5.01 (d,  $J = 8.0$  Hz, 1H), 4.76-4.61 (m, 3H), 4.39 (d,  $J = 12.0$  Hz, 1H), 4.28-4.20 (m, 2H), 4.07-4.03 (m, 1H), 3.89-3.81 (m, 1H), 3.20-3.14 (m, 1H), 2.90 (br, 1H), 1.25 (t,  $J = 8.0$  Hz, 3H), 1.06 (t,  $J = 8.0$  Hz, 3H);  $^{13}\text{C}$  NMR (100 MHz,  $\text{CDCl}_3$ )  $\delta$  170.5, 168.6, 160.4, 143.5, 141.9, 134.5, 129.3, 129.0, 128.9, 128.3, 125.0, 124.9, 124.7, 118.4, 83.6, 74.8, 62.9, 61.9, 58.1, 57.3, 42.6, 40.9, 13.9, 13.5. IR (KBr)  $\nu$  3445, 3357,

2984, 1733, 1637, 1206, 749  $\text{cm}^{-1}$ . HRMS (ESI) calcd for  $\text{C}_{26}\text{H}_{27}\text{N}_4\text{O}_9$   $[\text{M}+\text{H}]^+$ : 539.1773, found: 539.1776.

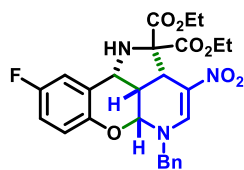

Diethyl 5-benzyl-9-fluoro-3-nitro-hexahydro-2H-6-oxa-1,5-diazaaceanthrylene-2,2-dicarboxylate  
(**3k**)

Yellow solid obtained by column chromatography (petroleum ether/ethyl acetate = 3:1 to 1:1); 75.2 mg, 74% yield; dr > 20:1; reaction time = 43 h; mp 147.1-147.8  $^{\circ}\text{C}$ ;  $^1\text{H}$  NMR (400 MHz,  $\text{CDCl}_3$ )  $\delta$  8.25 (s, 1H), 7.39-7.34 (m, 3H), 7.28-7.25 (m, 2H), 6.97 (dd,  $J_1 = 4.0$  Hz,  $J_2 = 8.0$  Hz, 1H), 6.93-6.88 (m, 1H), 6.81 (dd,  $J_1 = 4.0$  Hz,  $J_2 = 8.0$  Hz, 1H), 4.85 (d,  $J = 8.0$  Hz, 1H), 4.73 (d,  $J = 16.0$  Hz, 1H), 4.61 (d,  $J = 8.0$  Hz, 1H), 4.58 (s, 1H), 4.42 (d,  $J = 8.0$  Hz, 1H), 4.29-4.19 (m, 2H), 4.09-4.01 (m, 1H), 3.91-3.83 (m, 1H), 3.06-3.00 (m, 1H), 2.87 (br, 1H), 1.25 (t,  $J = 8.0$  Hz, 3H), 1.05 (t,  $J = 8.0$  Hz, 3H);  $^{13}\text{C}$  NMR (100 MHz,  $\text{CDCl}_3$ )  $\delta$  170.7, 168.4, 158.4 (d,  $J = 242.0$  Hz, 1C), 151.0 (d,  $J = 2.0$  Hz, 1C), 142.2, 134.7, 129.3 (d,  $J = 8.0$  Hz, 1C), 129.0, 128.6, 128.1, 124.0, 118.6 (d,  $J = 9.0$  Hz, 1C), 115.7 (d,  $J = 23.0$  Hz, 1C), 115.0 (d,  $J = 24.0$  Hz, 1C), 83.1, 74.6, 62.6, 61.6, 57.8, 57.7, 42.3, 41.0, 13.7, 13.4;  $^{19}\text{F}$  NMR (375 MHz,  $\text{CDCl}_3$ )  $\delta$  -118.5. IR (KBr)  $\nu$  3357, 2937, 1733, 1638, 1494, 1206, 747  $\text{cm}^{-1}$ . HRMS (ESI) calcd for  $\text{C}_{26}\text{H}_{27}\text{FN}_3\text{O}_7$   $[\text{M}+\text{H}]^+$ : 512.1828, found: 512.1827.

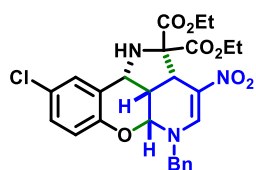

Diethyl 5-benzyl-9-chloro-3-nitro-hexahydro-2H-6-oxa-1,5-diazaaceanthrylene-2,2-dicarboxylate  
(**3l**)

Yellow solid obtained by column chromatography (petroleum ether/ethyl acetate = 3:1 to 1:1); 89.7 mg, 85% yield; dr > 20:1; reaction time = 48 h; mp 86.7-87.3  $^{\circ}\text{C}$ ;  $^1\text{H}$  NMR (400 MHz,  $\text{CDCl}_3$ )  $\delta$  8.21 (s, 1H), 7.37-7.29 (m, 3H), 7.24 (t,  $J = 4.0$  Hz, 2H), 7.19 (d,  $J = 4.0$  Hz, 1H), 7.14 (dd,  $J_1 = 4.0$  Hz,  $J_2 = 8.0$  Hz, 1H), 6.76 (d,  $J = 8.0$  Hz, 1H), 4.82 (d,  $J = 8.0$  Hz, 1H), 4.69 (d,  $J = 16.0$  Hz, 1H), 4.58 (d,  $J = 8.0$  Hz, 1H), 4.56 (s, 1H), 4.36 (d,  $J = 12.0$  Hz, 1H), 4.27-4.15 (m, 2H), 4.06-3.98



(m, 1H), 3.86-3.78 (m, 1H), 3.06-3.00 (m, 1H), 2.81 (br, 1H), 1.22 (t,  $J = 8.0$  Hz, 3H), 1.02 (t,  $J = 8.0$  Hz, 3H);  $^{13}\text{C}$  NMR (100 MHz,  $\text{CDCl}_3$ )  $\delta$  170.6, 168.4, 153.6, 142.1, 134.6, 129.6, 129.0, 128.9, 128.6, 128.4, 128.4, 128.1, 124.0, 118.8, 83.0, 74.5, 62.5, 61.6, 57.8, 57.4, 42.3, 40.9, 13.7, 13.3. IR (KBr)  $\nu$  3462, 3324, 2985, 1730, 1628, 1292, 1188, 755  $\text{cm}^{-1}$ . HRMS (ESI) calcd for  $\text{C}_{26}\text{H}_{27}\text{ClN}_3\text{O}_7$   $[\text{M}+\text{H}]^+$ : 528.1532, found: 528.1531.

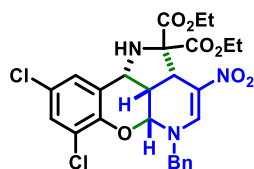

Diethyl

5-benzyl-7,9-dichloro-3-nitro-hexahydro-2H-6-oxa-1,5-diazaaceanthrylene-2,2-dicarboxylate

**(3m)**

Yellow solid obtained by column chromatography (petroleum ether/ethyl acetate = 3:1 to 1:1); 81.2 mg, 72% yield; dr > 20:1; reaction time = 48 h; mp 89.3-89.9  $^{\circ}\text{C}$ ;  $^1\text{H}$  NMR (400 MHz,  $\text{CDCl}_3$ )  $\delta$  8.24 (s, 1H), 7.39-7.28 (m, 6H), 7.14 (d,  $J = 4.0$  Hz, 1H), 4.87 (d,  $J = 8.0$  Hz, 1H), 4.78 (d,  $J = 16.0$  Hz, 1H), 4.64 (d,  $J = 16.0$  Hz, 1H), 4.55 (d,  $J = 4.0$  Hz, 1H), 4.37 (d,  $J = 8.0$  Hz, 1H), 4.30-4.18 (m, 2H), 4.15-4.07 (m, 1H), 3.94-3.86 (m, 1H), 3.11-3.05 (m, 1H), 2.86 (br, 1H), 1.25 (t,  $J = 8.0$  Hz, 3H), 1.09 (t,  $J = 8.0$  Hz, 3H);  $^{13}\text{C}$  NMR (100 MHz,  $\text{CDCl}_3$ )  $\delta$  170.5, 168.3, 149.6, 142.1, 134.3, 130.9, 129.1, 129.0, 128.7, 128.4, 128.3, 127.0, 124.3, 123.5, 83.3, 74.5, 62.7, 61.8, 57.6, 57.5, 42.3, 40.9, 13.7, 13.4. IR (KBr)  $\nu$  3465, 3419, 1740, 1640, 1299, 1193, 789  $\text{cm}^{-1}$ . HRMS (ESI) calcd for  $\text{C}_{26}\text{H}_{26}\text{Cl}_2\text{N}_3\text{O}_7$   $[\text{M}+\text{H}]^+$ : 562.1142, found: 562.1141.

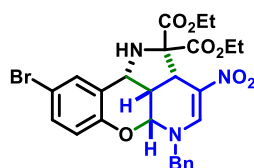

Diethyl 5-benzyl-9-bromo-3-nitro-hexahydro-2H-6-oxa-1,5-diazaaceanthrylene-2,2-dicarboxylate

**(3n)**

Yellow solid obtained by column chromatography (petroleum ether/ethyl acetate = 3:1 to 1:1); 71.3 mg, 62% yield; dr > 20:1; reaction time = 48 h; mp 143.6-143.9  $^{\circ}\text{C}$ ;  $^1\text{H}$  NMR (400 MHz,  $\text{CDCl}_3$ )  $\delta$  8.24 (s, 1H), 7.38-7.25 (m, 7H), 6.73 (d,  $J = 8.0$  Hz, 1H), 4.83 (d,  $J = 12.0$  Hz, 1H), 4.72 (d,  $J = 12.0$  Hz, 1H), 4.61 (d,  $J = 8.0$  Hz, 1H), 4.59 (s, 1H), 4.38 (d,  $J = 12.0$  Hz, 1H), 4.27-4.19

(m, 2H), 4.08-4.00 (m, 1H), 3.88-3.80 (m, 1H), 3.09-3.03 (m, 1H), 2.83 (br, 1H), 1.24 (t,  $J = 8.0$  Hz, 3H), 1.04 (t,  $J = 8.0$  Hz, 3H);  $^{13}\text{C}$  NMR (100 MHz,  $\text{CDCl}_3$ )  $\delta$  170.7, 168.4, 154.1, 142.1, 134.6, 131.9, 131.5, 130.1, 129.1, 128.7, 128.1, 124.2, 119.3, 115.9, 82.9, 74.6, 62.6, 61.7, 57.8, 57.4, 42.4, 41.1, 13.8, 13.4. IR (KBr)  $\nu$  3418, 3325, 2984, 1727, 1628, 1293, 1188, 754  $\text{cm}^{-1}$ . HRMS (ESI) calcd for  $\text{C}_{26}\text{H}_{27}\text{BrN}_3\text{O}_7$   $[\text{M}+\text{H}]^+$ : 572.1027, found: 572.1034.

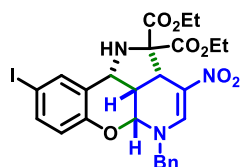

Diethyl 5-benzyl-9-iodo-3-nitro-hexahydro-2H-6-oxa-1,5-diazaaceanthrylene-2,2-dicarboxylate (**3o**)

Yellow solid obtained by column chromatography (petroleum ether/ethyl acetate = 3:1 to 1:1); 100.2 mg, 81% yield; dr > 20:1; reaction time = 48 h; mp 132.3-132.8 °C;  $^1\text{H}$  NMR (400 MHz,  $\text{CDCl}_3$ )  $\delta$  8.21 (s, 1H), 7.53 (d,  $J = 4.0$  Hz, 1H), 7.49 (d,  $J_1 = 4.0$  Hz,  $J_2 = 8.0$  Hz, 1H), 7.37-7.32 (m, 3H), 7.23-7.21 (m, 2H), 6.60 (d,  $J = 8.0$  Hz, 1H), 4.81 (d,  $J = 8.0$  Hz, 1H), 4.69 (d,  $J = 16.0$  Hz, 1H), 4.58-4.54 (m, 2H), 4.38 (d,  $J = 8.0$  Hz, 1H), 4.27-4.21 (m, 2H), 4.09-3.99 (m, 1H), 3.88-3.80 (m, 1H), 3.05-2.99 (m, 1H), 2.55 (s, 1H), 1.24 (t,  $J = 8.0$  Hz, 3H), 1.04 (t,  $J = 8.0$  Hz, 3H);  $^{13}\text{C}$  NMR (100 MHz,  $\text{CDCl}_3$ )  $\delta$  170.7, 168.5, 154.9, 142.1, 138.0, 137.4, 134.6, 130.5, 129.2, 128.8, 128.1, 124.2, 119.7, 86.4, 82.8, 74.6, 62.7, 61.3, 57.9, 57.2, 42.4, 41.2, 13.8, 13.5. IR (KBr)  $\nu$  3417, 2378, 1735, 1636, 1207, 753  $\text{cm}^{-1}$ . HRMS (ESI) calcd for  $\text{C}_{26}\text{H}_{27}\text{IN}_3\text{O}_7$   $[\text{M}+\text{H}]^+$ : 620.0888, found: 620.0889.

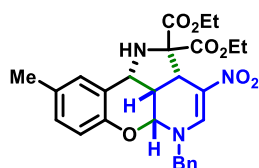

Diethyl

5-benzyl-9-methyl-3-nitro--hexahydro-2H-6-oxa-1,5-diazaaceanthrylene-2,2-dicarboxylate (**3p**)

Yellow solid obtained by column chromatography (petroleum ether/ethyl acetate = 3:1 to 1:1); 62.2 mg, 61% yield; dr > 20:1; reaction time = 48 h; mp 79.1-79.8 °C;  $^1\text{H}$  NMR (400 MHz,  $\text{CDCl}_3$ )  $\delta$  8.24 (s, 1H), 7.36-7.29 (m, 3H), 7.25-7.23 (m, 2H), 7.03-6.98 (m, 2H), 6.74 (d,  $J = 8.0$  Hz, 1H), 4.81 (d,  $J = 8.0$  Hz, 1H), 4.71 (d,  $J = 16.0$  Hz, 1H), 4.57 (d,  $J = 16.0$  Hz, 1H), 4.55 (s, 1H), 4.41 (d,

$J = 8.0$  Hz, 1H), 4.27-4.19 (m, 2H), 4.07-3.99 (m, 1H), 3.88-3.80 (m, 1H), 3.03-2.97 (m, 1H), 2.82 (br, 1H), 2.27 (s, 3H), 1.24 (t,  $J = 8.0$  Hz, 3H), 1.02 (t,  $J = 8.0$  Hz, 3H);  $^{13}\text{C}$  NMR (100 MHz,  $\text{CDCl}_3$ )  $\delta$  171.0, 168.6, 152.9, 142.5, 134.9, 133.4, 129.7, 129.1, 128.7, 128.2, 127.8, 124.0, 117.3, 82.9, 74.7, 62.6, 61.7, 57.9, 57.9, 42.6, 41.5, 20.8, 13.9, 13.5, one carbon missing in the aromatic region. IR (KBr)  $\nu$  3416, 1728, 1630, 1196, 748  $\text{cm}^{-1}$ . HRMS (ESI) calcd for  $\text{C}_{27}\text{H}_{30}\text{N}_3\text{O}_7$   $[\text{M}+\text{H}]^+$ : 508.2078, found: 503.2079.

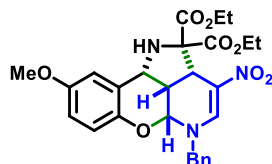

Diethyl

5-benzyl-9-methoxy-3-nitro-hexahydro-2H-6-oxa-1,5-diazaaceanthrylene-2,2-dicarboxylate (**3q**)

Yellow solid obtained by column chromatography (petroleum ether/ethyl acetate = 3:1 to 1:1); 83.2 mg, 80% yield; dr > 20:1; reaction time = 48 h; mp 112.3-112.7  $^{\circ}\text{C}$ ;  $^1\text{H}$  NMR (400 MHz,  $\text{CDCl}_3$ )  $\delta$  8.23 (s, 1H), 7.37-7.31 (m, 3H), 7.25-7.23 (m, 2H), 6.80-6.72 (m, 3H), 4.81 (d,  $J = 12.0$  Hz, 1H), 4.71 (d,  $J = 16.0$  Hz, 1H), 4.57 (d,  $J = 16.0$  Hz, 1H), 4.51 (d,  $J = 4.0$  Hz, 1H), 4.44 (d,  $J = 8.0$  Hz, 1H), 4.26-4.21 (m, 2H), 4.08-4.00 (m, 1H), 3.91-3.83 (m, 1H), 3.74 (s, 3H), 3.01-2.95 (m, 1H), 2.88 (br, 1H), 1.24 (t,  $J = 8.0$  Hz, 3H), 1.04 (t,  $J = 8.0$  Hz, 3H);  $^{13}\text{C}$  NMR (100 MHz,  $\text{CDCl}_3$ )  $\delta$  171.0, 168.6, 155.8, 148.9, 142.5, 134.9, 129.2, 128.8, 128.7, 128.2, 123.9, 118.4, 114.6, 113.3, 83.1, 74.8, 62.6, 61.7, 58.2, 57.9, 55.7, 42.5, 41.4, 13.9, 13.5. IR (KBr)  $\nu$  3471, 3417, 2982, 1735, 1631, 1299, 1198, 747  $\text{cm}^{-1}$ . HRMS (ESI) calcd for  $\text{C}_{27}\text{H}_{30}\text{N}_3\text{O}_8$   $[\text{M}+\text{H}]^+$ : 524.2027, found: 524.2028.

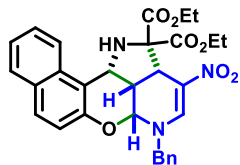

Diethyl

5-benzyl-3-nitro-hexahydro-2H-6-oxa-1,5-diazacyclopenta[no]tetraphene-2,2-dicarboxylate (**3r**)

Yellow solid obtained by column chromatography (petroleum ether/ethyl acetate = 3:1 to 1:1); 92.3 mg, 85% yield; dr > 20:1; reaction time = 48 h; mp 92.3-92.7  $^{\circ}\text{C}$ ;  $^1\text{H}$  NMR (400 MHz,  $\text{CDCl}_3$ )  $\delta$  8.26 (s, 1H), 8.05 (d,  $J = 8.0$  Hz, 1H), 7.78 (d,  $J = 8.0$  Hz, 1H), 7.69 (d,  $J = 8.0$  Hz, 1H), 7.53 (t,

$J = 8.0$  Hz, 1H), 7.40 (t,  $J = 8.0$  Hz, 1H), 7.37-7.31 (m, 3H), 7.28 (t,  $J = 4.0$  Hz, 2H), 7.00 (d,  $J = 8.0$  Hz, 1H), 5.59 (d,  $J = 8.0$  Hz, 1H), 4.75 (d,  $J = 12.0$  Hz, 1H), 4.70 (d,  $J = 8.0$  Hz, 1H), 4.61 (d,  $J = 12.0$  Hz, 1H), 4.41 (d,  $J = 12.0$  Hz, 1H), 4.27-4.16 (m, 2H), 3.98-3.90 (m, 1H), 3.71-3.62 (m, 1H), 3.20-3.14 (m, 1H), 2.89 (br, 1H), 1.20 (t,  $J = 8.0$  Hz, 3H), 0.88 (t,  $J = 8.0$  Hz, 3H);  $^{13}\text{C}$  NMR (100 MHz,  $\text{CDCl}_3$ )  $\delta$  170.8, 168.4, 152.6, 142.3, 134.8, 131.3, 130.4, 129.4, 128.9, 128.7, 128.5, 128.1, 127.3, 124.4, 121.9, 120.0, 117.9, 82.1, 74.3, 62.3, 61.3, 57.8, 53.2, 41.9, 40.8, 13.7, 13.1, one carbon missing in the aromatic region. IR (KBr)  $\nu$  3444, 3353, 1731, 1637, 1311, 1204, 731  $\text{cm}^{-1}$ . HRMS (ESI) calcd for  $\text{C}_{30}\text{H}_{30}\text{N}_3\text{O}_7$   $[\text{M}+\text{H}]^+$ : 544.2078, found: 544.2079.

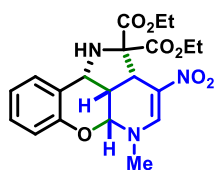

Diethyl 5-methyl-3-nitro-hexahydro-2*H*-6-oxa-1,5-diazaaceanthrylene-2,2-dicarboxylate (**3s**)

Yellow solid obtained by column chromatography (petroleum ether/ethyl acetate = 3:1 to 1:1); 58.3 mg, 70% yield; dr > 20:1; reaction time = 48 h; mp 142.1-142.8 °C;  $^1\text{H}$  NMR (400 MHz,  $\text{CDCl}_3$ )  $\delta$  8.11 (s, 1H), 7.28 (dd,  $J_1 = 4.0$  Hz,  $J_2 = 8.0$  Hz, 1H), 7.22 (t,  $J = 8.0$  Hz, 1H), 7.05 (t,  $J = 8.0$  Hz, 1H), 6.89 (d,  $J = 8.0$  Hz, 1H), 4.90 (d,  $J = 8.0$  Hz, 1H), 4.61 (d,  $J = 4.0$  Hz, 1H), 4.41 (d,  $J = 8.0$  Hz, 1H), 4.26-4.21 (m, 2H), 4.06-4.02 (m, 1H), 3.86-3.78 (m, 1H), 3.28 (s, 3H), 3.15-3.09 (m, 1H), 2.83 (br, 1H), 1.24 (t,  $J = 8.0$  Hz, 3H), 1.02 (t,  $J = 8.0$  Hz, 3H);  $^{13}\text{C}$  NMR (100 MHz,  $\text{CDCl}_3$ )  $\delta$  170.9, 168.5, 155.0, 143.1, 129.1, 128.7, 128.0, 123.87, 123.4, 117.6, 84.8, 74.6, 62.5, 61.6, 57.6, 42.0, 41.5, 41.3, 13.8, 13.4. IR (KBr)  $\nu$  3463, 2934, 1740, 1634, 1298, 1266, 1225, 759  $\text{cm}^{-1}$ . HRMS (ESI) calcd for  $\text{C}_{20}\text{H}_{24}\text{N}_3\text{O}_7$   $[\text{M}+\text{H}]^+$ : 418.1609, found: 418.1609.

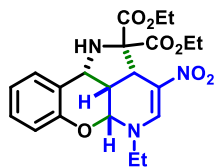

Diethyl 5-ethyl-3-nitro-hexahydro-2*H*-6-oxa-1,5-diazaaceanthrylene-2,2-dicarboxylate (**3t**)

Yellow solid obtained by column chromatography (petroleum ether/ethyl acetate = 3:1 to 1:1); 55.1 mg, 64% yield; dr > 20:1; reaction time = 48 h; mp 104.6-104.9 °C;  $^1\text{H}$  NMR (400 MHz,  $\text{CDCl}_3$ )  $\delta$  8.19 (s, 1H), 7.30 (d,  $J = 4.0$  Hz, 1H), 7.24 (t,  $J = 8.0$  Hz, 1H), 7.07 (t,  $J = 8.0$  Hz, 1H), 6.89 (d,  $J = 8.0$  Hz, 1H), 4.95 (d,  $J = 8.0$  Hz, 1H), 4.71 (d,  $J = 4.0$  Hz, 1H), 4.43 (d,  $J = 12.0$  Hz,

1H), 4.31-4.20 (m, 2H), 4.10-4.02 (m, 1H), 3.89-3.81 (m, 1H), 3.67-3.58 (m, 1H), 3.54-3.45 (m, 1H), 3.14-3.08 (m, 1H), 2.84 (br, 1H), 1.35 (t,  $J = 8.0$  Hz, 3H), 1.26 (t,  $J = 8.0$  Hz, 3H), 1.05 (t,  $J = 8.0$  Hz, 3H);  $^{13}\text{C}$  NMR (100 MHz,  $\text{CDCl}_3$ )  $\delta$  171.1, 168.7, 155.3, 142.0, 129.2, 128.8, 128.2, 123.9, 123.5, 117.7, 83.9, 74.7, 62.6, 61.6, 57.9, 49.6, 42.3, 41.5, 15.0, 13.9, 13.5. IR (KBr)  $\nu$  3445, 2983, 1735, 1639, 1260, 1211, 760  $\text{cm}^{-1}$ . HRMS (ESI) calcd for  $\text{C}_{21}\text{H}_{26}\text{N}_3\text{O}_7$   $[\text{M}+\text{H}]^+$ : 432.1765, found: 432.1765.

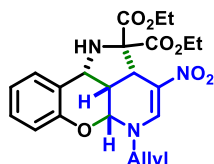

Diethyl

5-allyl-3-nitro-1,2a,2a1,5,5a,10b-hexahydro-2H-6-oxa-1,5-diazaaceanthrylene-2,2-dicarboxylate

**(3u)**

Yellow oil obtained by column chromatography (petroleum ether/ethyl acetate = 3:1 to 1:1); 67.5 mg, 76% yield; dr > 20:1; reaction time = 48 h;  $^1\text{H}$  NMR (300 MHz,  $\text{CDCl}_3$ )  $\delta$  8.09 (s, 1H), 7.23-7.13 (m, 2H), 7.02-6.97 (m, 1H), 6.81 (d,  $J = 9.0$  Hz, 1H), 5.89-5.76 (m, 1H), 5.26 (s, 1H), 5.21 (d,  $J = 6.0$  Hz, 1H), 4.87 (d,  $J = 9.0$  Hz, 1H), 4.62 (d,  $J = 6.0$  Hz, 1H), 4.33 (d,  $J = 9.0$  Hz, 1H), 4.22-3.92 (m, 5H), 3.80-3.69 (m, 1H), 3.10-3.02 (m, 1H), 2.78 (br, 1H), 1.18 (t,  $J = 6.0$  Hz, 3H), 0.96 (t,  $J = 6.0$  Hz, 3H);  $^{13}\text{C}$  NMR (75 MHz,  $\text{CDCl}_3$ )  $\delta$  170.7, 168.3, 154.9, 142.0, 131.8, 128.8, 128.5, 127.9, 123.5, 123.5, 119.9, 117.3, 83.1, 74.3, 62.2, 61.3, 57.5, 56.5, 42.1, 41.0, 13.6, 13.2. IR (KBr)  $\nu$  3421, 2927, 1735, 1639, 1207, 765  $\text{cm}^{-1}$ . HRMS (ESI) calcd for  $\text{C}_{22}\text{H}_{26}\text{N}_3\text{O}_7$   $[\text{M}+\text{H}]^+$ : 444.1760, found: 444.1762.

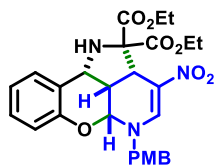

Diethyl

5-(4-methoxybenzyl)-3-nitro-1,2a,2a1,5,5a,10b-hexahydro-2H-6-oxa-1,5-diazaaceanthrylene-2,2-dicarboxylate **(3v)**

Yellow oil obtained by column chromatography (petroleum ether/ethyl acetate = 3:1 to 1:1); 71.1 mg, 70% yield; dr > 20:1; reaction time = 48 h;  $^1\text{H}$  NMR (300 MHz,  $\text{CDCl}_3$ )  $\delta$  8.23 (s, 1H), 7.24-7.15 (m, 4H), 7.02 (t,  $J = 9.0$  Hz, 1H), 6.90-6.83 (m, 3H), 4.86 (d,  $J = 8.0$  Hz, 1H), 4.67-4.49

(m, 3H), 4.40 (d,  $J = 9.0$  Hz, 1H), 4.26-4.19 (m, 2H), 4.05-3.97 (m, 1H), 3.84-3.76 (m, 4H), 3.04-2.96 (m, 1H), 2.78 (br, 1H), 1.22 (t,  $J = 9.0$  Hz, 3H), 1.00 (t,  $J = 9.0$  Hz, 3H);  $^{13}\text{C}$  NMR (75 MHz,  $\text{CDCl}_3$ )  $\delta$  170.8, 168.4, 159.7, 155.0, 142.3, 129.6, 129.0, 128.6, 128.0, 126.4, 123.7, 123.6, 117.4, 114.3, 82.5, 74.4, 62.4, 61.5, 57.6, 57.2, 55.1, 42.3, 41.2, 13.7, 13.3. IR (KBr)  $\nu$  3419, 2926, 1735, 1639, 1301, 764  $\text{cm}^{-1}$ . HRMS (ESI) calcd for  $\text{C}_{27}\text{H}_{30}\text{N}_3\text{O}_6$   $[\text{M}+\text{H}]^+$ : 524.2085, found: 524.2082.

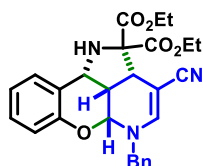

Diethyl 5-benzyl-3-cyano-hexahydro-2H-6-oxa-1,5-diazaaceanthrylene-2,2-dicarboxylate (**3w**)

Yellow solid obtained by column chromatography (petroleum ether/ethyl acetate = 3:1 to 1:1); 57.2 mg, 60% yield; dr > 20:1; reaction time = 48 h; mp 87.6-88.1  $^{\circ}\text{C}$ ;  $^1\text{H}$  NMR (400 MHz,  $\text{CDCl}_3$ )  $\delta$  7.36-7.24 (m, 5H), 7.20 (d,  $J = 8.0$  Hz, 2H), 7.05 (t,  $J = 8.0$  Hz, 1H), 6.92 (d,  $J = 8.0$  Hz, 2H), 4.64 (d,  $J = 8.0$  Hz, 1H), 4.61 (d,  $J = 8.0$  Hz, 1H), 4.49 (d,  $J = 16.0$  Hz, 1H), 4.36 (d,  $J = 16.0$  Hz, 1H), 4.31-4.16 (m, 3H), 4.14-4.06 (m, 1H), 4.03 (d,  $J = 8.0$  Hz, 1H), 3.06-3.00 (m, 1H), 2.55 (br, 1H), 1.27 (t,  $J = 8.0$  Hz, 3H), 1.17 (t,  $J = 8.0$  Hz, 3H);  $^{13}\text{C}$  NMR (100 MHz,  $\text{CDCl}_3$ )  $\delta$  169.4, 168.3, 154.5, 146.0, 135.5, 129.0, 128.9, 128.4, 128.3, 128.0, 127.7, 123.5, 120.3, 117.8, 82.0, 78.8, 75.3, 62.5, 61.9, 56.8, 56.6, 41.3, 40.7, 13.8, 13.6. IR (KBr)  $\nu$  3445, 2985, 1735, 1638, 1201, 763  $\text{cm}^{-1}$ . HRMS (ESI) calcd for  $\text{C}_{27}\text{H}_{28}\text{N}_3\text{O}_5$   $[\text{M}+\text{H}]^+$ : 474.2023, found: 474.2023.

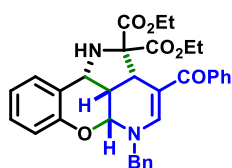

Diethyl

3-benzoyl-5-benzyl-1,2a,2a1,5,5a,10b-hexahydro-2H-6-oxa-1,5-diazaaceanthrylene-2,2-dicarboxylate (**3x**)

Yellow oil obtained by column chromatography (petroleum ether/ethyl acetate = 3:1 to 1:1); 29.1 mg, 26% yield; dr > 20:1; reaction time = 48 h;  $^1\text{H}$  NMR (300 MHz,  $\text{CDCl}_3$ )  $\delta$  7.63-7.61 (m, 2H), 7.42-7.27 (m, 7H), 7.23-7.11 (m, 4H), 7.05-7.00 (m, 1H), 6.88 (d,  $J = 6.0$  Hz, 1H), 4.88 (d,  $J = 9.0$  Hz, 1H), 4.62 (dd,  $J_1 = 3.0$  Hz,  $J_2 = 9.0$  Hz, 2H), 4.40-4.21 (m, 4H), 4.04-3.93 (m, 1H), 3.89-3.78 (m, 1H), 3.02-2.94 (m, 1H), 1.19 (t,  $J = 6.0$  Hz, 3H), 0.95 (t,  $J = 6.0$  Hz, 3H), one hydrogen for

N-H was missing;  $^{13}\text{C}$  NMR (75 MHz,  $\text{CDCl}_3$ )  $\delta$  194.1, 171.1, 168.8, 155.0, 148.5, 139.8, 135.9, 130.0, 128.8, 128.7, 128.6, 128.5, 128.0, 127.9, 127.7, 123.4, 117.4, 110.6, 83.2, 74.6, 62.4, 61.0, 57.3, 57.2, 41.5, 40.8, 13.8, 13.5, one carbon missing in the aromatic region. IR (KBr)  $\nu$  3430, 2924, 2856, 1637  $\text{cm}^{-1}$ . HRMS (ESI) calcd for  $\text{C}_{33}\text{H}_{33}\text{N}_2\text{O}_6$   $[\text{M}+\text{H}]^+$ : 553.2333, found: 553.2332.

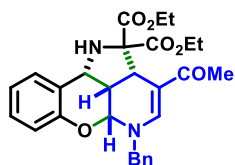

Diethyl

3-acetyl-5-benzyl-1,2a,2a1,5,5a,10b-hexahydro-2H-6-oxa-1,5-diazaaceanthrylene-2,2-dicarboxylate (**3y**)

Yellow oil obtained by column chromatography (petroleum ether/ethyl acetate = 3:1 to 1:1); 10.8 mg, 11% yield; dr > 20:1; reaction time = 48 h;  $^1\text{H}$  NMR (300 MHz,  $\text{CDCl}_3$ )  $\delta$  7.38-7.30 (m, 5H), 7.25-7.22 (m, 2H), 7.18 (dd,  $J_1 = 6.0$  Hz,  $J_2 = 3.0$  Hz, 1H), 7.04-6.99 (m, 1H), 6.87 (d,  $J = 9.0$  Hz, 1H), 4.81 (d,  $J = 9.0$  Hz, 1H), 4.68 (d,  $J = 15.0$  Hz, 1H), 4.58 (d,  $J = 3.0$  Hz, 1H), 4.50 (d,  $J = 15.0$  Hz, 1H), 4.38-4.21 (m, 3H), 4.12 (d,  $J = 12.0$  Hz, 1H), 4.05-3.94 (m, 1H), 3.83-3.72 (m, 1H), 2.98-2.90 (m, 1H), 2.23 (s, 3H), 1.29 (t,  $J = 6.0$  Hz, 3H), 0.98 (t,  $J = 6.0$  Hz, 3H);  $^{13}\text{C}$  NMR (75 MHz,  $\text{CDCl}_3$ )  $\delta$  204.1, 194.7, 171.5, 168.9, 155.4, 144.4, 136.2, 128.9, 128.8, 128.7, 128.6, 128.2, 127.8, 123.4, 117.5, 83.4, 75.0, 62.3, 61.1, 57.7, 57.3, 41.5, 41.3, 24.3, 14.0, 13.5. IR (KBr)  $\nu$  3428, 2926, 1733, 1620, 1205, 759  $\text{cm}^{-1}$ . HRMS (ESI) calcd for  $\text{C}_{28}\text{H}_{31}\text{N}_2\text{O}_6$   $[\text{M}+\text{H}]^+$ : 491.2023, found: 491.2021.

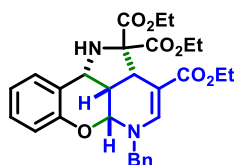

Triethyl

5-benzyl-1,2a,2a1,5,5a,10b-hexahydro-2H-6-oxa-1,5-diazaaceanthrylene-2,2,3-tricarboxylate (**3z**)

Yellow oil obtained by column chromatography (petroleum ether/ethyl acetate = 3:1 to 1:1); 10.6 mg, 10% yield; dr > 20:1; reaction time = 48 h;  $^1\text{H}$  NMR (300 MHz,  $\text{CDCl}_3$ )  $\delta$  7.56 (s, 1H), 7.39-7.22 (m, 7H), 7.04 (t,  $J = 6.0$  Hz, 1H), 6.94 (d,  $J = 9.0$  Hz, 1H), 4.76 (d,  $J = 9.0$  Hz, 1H), 4.70 (d,  $J = 15.0$  Hz, 1H), 4.56 (d,  $J = 6.0$  Hz, 1H), 4.50 (d,  $J = 15.0$  Hz, 1H), 4.35-4.14 (m, 5H), 4.12-3.95 (m, 2H), 2.98-2.90 (m, 1H), 1.30 (t,  $J = 9.0$  Hz, 6H), 1.12 (t,  $J = 6.0$  Hz, 3H), one

hydrogen for N-H was missing;  $^{13}\text{C}$  NMR (75 MHz,  $\text{CDCl}_3$ )  $\delta$  171.2, 169.3, 167.7, 155.7, 142.8, 136.4, 128.9, 128.8, 128.6, 128.6, 127.9, 127.7, 123.2, 117.8, 98.7, 83.5, 75.6, 61.9, 61.4, 59.4, 58.5, 56.9, 42.1, 41.8, 14.4, 13.9, 13.6. IR (KBr)  $\nu$  3420, 2925, 1732, 1623, 1208, 768  $\text{cm}^{-1}$ . HRMS (ESI) calcd for  $\text{C}_{29}\text{H}_{33}\text{N}_2\text{O}_7$   $[\text{M}+\text{H}]^+$ : 521.1218, found: 521.1216.

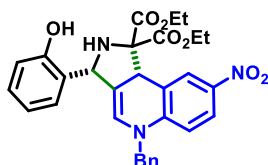

Diethyl

5-benzyl-3-(2-hydroxyphenyl)-8-nitro-2,3,5,9b-tetrahydro-1*H*-pyrrolo[3,4-*c*]quinoline-1,1-dicarboxylate (**3aa**)

Yellow solid obtained by column chromatography (petroleum ether/ethyl acetate = 3:1); 74.0 mg, 91% yield; dr > 20:1; reaction time = 2 h; mp 179.7-181.1  $^\circ\text{C}$ ;  $^1\text{H}$  NMR (400 MHz,  $\text{CDCl}_3$ )  $\delta$  9.88 (s, 1H), 8.65 (s, 1H), 7.87 (d,  $J$  = 8.0 Hz, 1H), 7.31 (t,  $J$  = 8.0 Hz, 2H), 7.24-7.16 (m, 4H), 7.04 (d,  $J$  = 8.0 Hz, 1H), 6.89 (d,  $J$  = 8.0 Hz, 1H), 6.81 (t,  $J$  = 8.0 Hz, 1H), 6.57 (d,  $J$  = 8.0 Hz, 1H), 5.68 (s, 1H), 4.90 (s, 1H), 4.81 (s, 1H), 4.70-4.43 (m, 4H), 3.99-3.83 (m, 2H), 3.76 (br, 1H), 1.52 (t,  $J$  = 8.0 Hz, 3H), 0.93 (t,  $J$  = 8.0 Hz, 3H);  $^{13}\text{C}$  NMR (100 MHz,  $\text{DMSO}-d_6$ )  $\delta$  171.0, 170.2, 157.6, 144.3, 140.5, 135.8, 129.7, 129.7, 129.0, 127.7, 126.8, 126.6, 125.9, 124.3, 120.3, 119.0, 118.8, 117.7, 112.7, 111.6, 75.5, 63.4, 62.7, 62.4, 55.1, 45.8, 14.0, 13.4. IR (KBr)  $\nu$  3416, 2923, 1726, 1613, 1328, 755  $\text{cm}^{-1}$ . HRMS (ESI) calcd for  $\text{C}_{30}\text{H}_{30}\text{N}_3\text{O}_7$   $[\text{M}+\text{H}]^+$ : 544.2078, found: 544.2078.

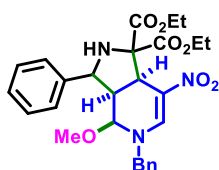

Diethyl

5-benzyl-4-methoxy-7-nitro-3-phenyl-2,3,3a,4,5,7a-hexahydro-1*H*-pyrrolo[3,4-*c*]pyridine-1,1-dicarboxylate (**3ab**)

Yellow solid obtained by column chromatography (petroleum ether/ethyl acetate = 3:1 to 1:1); 50.6 mg, 50% yield; dr > 20:1; reaction time = 48 h; mp 182.3-182.7  $^\circ\text{C}$ ;  $^1\text{H}$  NMR (300 MHz,  $\text{CDCl}_3$ )  $\delta$  7.98 (s, 1H), 7.34-7.29 (m, 5H), 7.24-7.18 (m, 3H), 7.04 (dd,  $J_1$  = 6.0 Hz,  $J_2$  = 3.0 Hz, 2H), 4.82 (d,  $J$  = 6.0 Hz, 1H), 4.65 (d,  $J$  = 9.0 Hz, 1H), 4.53 (d,  $J$  = 15.0 Hz, 1H), 4.36-4.12 (m,



5H), 3.84 (d,  $J = 3.0$  Hz, 1H), 2.89 (s, 3H), 2.30-2.24 (m, 1H), 1.29 (t,  $J = 9.0$  Hz, 3H), 1.22 (t,  $J = 9.0$  Hz, 3H), one hydrogen for N-H was missing;  $^{13}\text{C}$  NMR (75 MHz,  $\text{CDCl}_3$ )  $\delta$  172.1, 169.5, 141.1, 137.1, 135.4, 129.2, 128.5, 128.3, 127.4, 127.2, 126.2, 125.7, 85.3, 75.2, 64.2, 62.2, 61.7, 59.9, 54.9, 45.9, 42.8, 13.9, 13.6. IR (KBr)  $\nu$  3419, 2924, 2377, 1739, 1617, 753  $\text{cm}^{-1}$ . HRMS (ESI) calcd for  $\text{C}_{27}\text{H}_{32}\text{N}_3\text{O}_7$   $[\text{M}+\text{H}]^+$ : 510.2076, found: 510.2078.

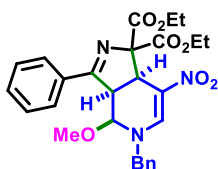

Diethyl

5-benzyl-4-methoxy-7-nitro-3-phenyl-3a,4,5,7a-tetrahydro-1H-pyrrolo[3,4-c]pyridine-1,1-dicarboxylate (**3ab'**)

Yellow solid obtained by column chromatography (petroleum ether/ethyl acetate = 3:1 to 1:1); 21.7 mg, 21% yield; dr > 20:1; reaction time = 48 h; mp 198.1-198.8  $^{\circ}\text{C}$ ;  $^1\text{H}$  NMR (300 MHz,  $\text{CDCl}_3$ )  $\delta$  8.09 (s, 1H), 7.76-7.73 (m, 2H), 7.50-7.36 (m, 6H), 7.24-7.22 (m, 2H), 4.68-4.51 (m, 3H), 4.42-4.27 (m, 3H), 4.25-4.19 (m, 1H), 4.16-4.02 (m, 1H), 3.43 (dd,  $J_1 = 6.0$  Hz,  $J_2 = 3.0$  Hz, 1H), 2.98 (s, 3H), 1.33 (t,  $J = 9.0$  Hz, 3H), 1.25 (t,  $J = 9.0$  Hz, 3H);  $^{13}\text{C}$  NMR (75 MHz,  $\text{CDCl}_3$ )  $\delta$  172.8, 169.9, 167.0, 140.7, 135.3, 132.3, 131.7, 129.3, 128.8, 128.8, 128.1, 127.7, 126.0, 87.2, 84.1, 62.7, 61.0, 59.6, 56.8, 49.7, 40.5, 13.9, 13.8. IR (KBr)  $\nu$  3445, 2929, 1738, 1618, 1298, 747  $\text{cm}^{-1}$ . HRMS (ESI) calcd for  $\text{C}_{27}\text{H}_{30}\text{N}_3\text{O}_7$   $[\text{M}+\text{H}]^+$ : 508.2074, found: 508.2076.

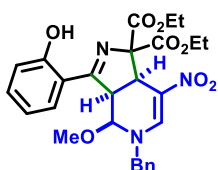

Diethyl

5-benzyl-3-(2-hydroxyphenyl)-4-methoxy-7-nitro-tetrahydro-1H-pyrrolo[3,4-c]pyridine-1,1-dicarboxylate (**4**)

Light yellow solid obtained by column chromatography (petroleum ether/ethyl acetate = 3:1); 8.9 mg, 9% yield; dr > 20:1; reaction time = 48 h; mp 273.2-273.6  $^{\circ}\text{C}$ ;  $^1\text{H}$  NMR (400 MHz,  $\text{CDCl}_3$ )  $\delta$  12.81 (s, 1H), 8.13 (s, 1H), 7.50-7.42 (m, 3H), 7.37 (t,  $J = 8.0$  Hz, 1H), 7.27 (s, 2H), 7.06-7.00 (m, 2H), 6.80 (t,  $J = 8.0$  Hz, 1H), 4.69 (d,  $J = 16.0$  Hz, 1H), 6.66 (d,  $J = 4.0$  Hz, 1H), 4.57 (d,  $J = 16.0$

Hz, 1H), 4.39-4.29 (m, 3H), 4.27-4.21 (m, 1H), 4.08-4.00 (m, 1H), 3.48 (dd,  $J_1 = 4.0$  Hz,  $J_2 = 12.0$  Hz, 1H), 2.99 (s, 3H), 1.35 (t,  $J = 8.0$  Hz, 3H), 1.25 (t,  $J = 8.0$  Hz, 3H);  $^{13}\text{C}$  NMR (100 MHz, DMSO- $d_6$ )  $\delta$  177.0, 169.1, 165.8, 160.2, 142.3, 137.0, 133.9, 130.0, 128.9, 128.1, 128.0, 123.7, 119.1, 117.1, 115.3, 85.3, 84.0, 62.1, 60.5, 58.0, 55.5, 48.8, 39.2, 13.8, 13.6. IR (KBr)  $\nu$  3415, 2930, 1740, 1617, 1302, 1266, 770  $\text{cm}^{-1}$ . HRMS (ESI) calcd for  $\text{C}_{27}\text{H}_{29}\text{N}_3\text{O}_8$   $[\text{M}+\text{H}]^+$ : 524.2027, found: 524.2027.

### 3. Scalable preparation of **3a**

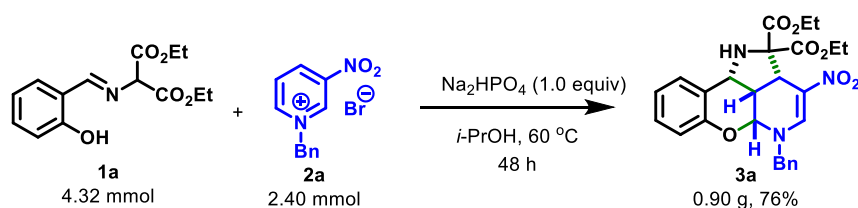

**General procedure:** To a solution of azomethine ylide **1a** (1.21 g, 4.32 mmol) and pyridinium salt **2a** (0.71 g, 2.40 mmol) in *i*-PrOH (12 mL) was added  $\text{Na}_2\text{HPO}_4$  (0.34 g, 2.40 mmol) successively. After being stirred at 60 °C for 48 h, the mixture was concentrated in vacuum. The residue was purified via flash column chromatography on silica gel (petroleum ether/ ethyl acetate = 3:1 to 1:1) to afford the corresponding product **3a** as yellow solid in 76% yield (0.90 g).

### 4. Late-stage modifications

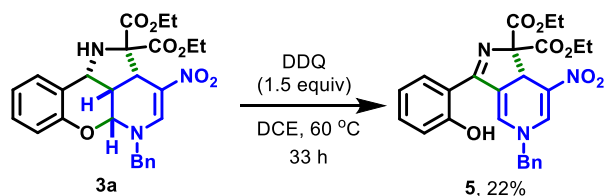

**General procedure for the formation of **5**:** A solution of **3a** (98.7 mg, 0.20 mmol) and DDQ (68.1 mg, 0.3 mmol) in 2.0 mL of DCE was heated to 60 °C. The reaction mixture was stirred 33 h until the complete consumption of **3a** as monitored by thin layer chromatography. Then, the mixture was concentrated and purified with silica gel column chromatography to obtain **5** as yellow solid in 22% yield.

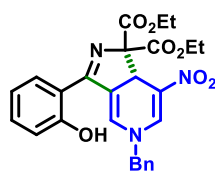

Diethyl

5-benzyl-3-(2-hydroxyphenyl)-7-nitro-5,7a-dihydro-1H-pyrrolo[3,4-c]pyridine-1,1-dicarboxylate

(5)

Yellow solid obtained by column chromatography (petroleum ether/ethyl acetate = 3:1); 21.2 mg, 22% yield; dr > 20:1; reaction time = 33 h; mp 223.4-223.9 °C; <sup>1</sup>H NMR (400 MHz, CDCl<sub>3</sub>) δ 12.35 (s, 1H), 7.71 (s, 1H), 7.43-7.35 (m, 5H), 7.21 (d, *J* = 8.0 Hz, 2H), 7.05 (d, *J* = 12.0 Hz, 1H), 6.85 (t, *J* = 8.0 Hz, 1H), 6.57 (s, 1H), 5.01 (s, 1H), 4.60 (s, 2H), 4.39 (q, *J* = 8.0 Hz, 2H), 4.23-4.08 (m, 2H), 1.35 (t, *J* = 8.0 Hz, 3H), 1.18 (t, *J* = 8.0 Hz, 3H); <sup>13</sup>C NMR (100 MHz, DMSO-*d*<sub>6</sub>) δ 172.8, 168.9, 165.8, 160.8, 137.2, 134.5, 133.6, 129.4, 129.1, 129.0, 128.3, 127.2, 126.2, 119.6, 118.8, 118.2, 114.3, 83.3, 62.7, 62.0, 58.3, 43.8, 14.0, 13.7. IR (KBr) ν 3420, 2929, 1735, 1594, 1296, 758 cm<sup>-1</sup>. HRMS (ESI) calcd for C<sub>26</sub>H<sub>26</sub>N<sub>3</sub>O<sub>7</sub> [M+H]<sup>+</sup>: 492.1765, found: 492.1765.

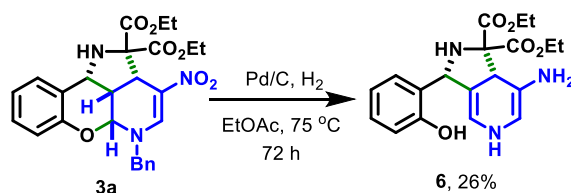

**General procedure for the formation of 6:** To a solution of compound **3a** (98.7 mg, 0.2 mmol) in EtOAc (2 mL) was added Pd/C (21.3 mg, 10% by weight on activated carbon). Hydrogenation was carried out under hydrogen atmosphere at 75 °C under atmospheric pressure for 72 h. Then, the reaction mixture was filtered and the filtrate was concentrated in vacuo. Purification of the residue by flash column chromatography afford the desired product **6** (19.6 mg, 26% yield).

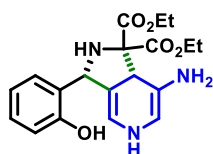

Diethyl 7-amino-3-(2-hydroxyphenyl)- tetrahydro-1H-pyrrolo[3,4-c]pyridine-1,1-dicarboxylate

(6)

Yellow solid obtained by column chromatography (dichloromethane/methanol = 60:1 to 30:1); 19.6 mg, 26% yield; dr > 20:1; reaction time = 72 h; mp 115.7-116.3 °C; <sup>1</sup>H NMR (400 MHz, CDCl<sub>3</sub>) δ 10.27 (br, 1H), 8.01 (s, 2H), 7.20 (t, *J* = 8.0 Hz, 1H), 7.00 (t, *J* = 4.0 Hz, 1H), 6.91 (d, *J* = 8.0 Hz, 1H), 6.86 (d, *J* = 4.0 Hz, 1H), 6.78 (t, *J* = 8.0 Hz, 1H), 4.89 (s, 1H), 4.35-4.19 (m, 4H), 4.11 (s, 1H), 3.77 (br, 2H), 3.15 (br, 1H), 1.31-1.25 (m, 6H); <sup>13</sup>C NMR (100 MHz, CDCl<sub>3</sub>) δ 167.8, 167.1, 156.9, 143.1, 138.3, 136.6, 129.6, 129.2, 122.9, 120.5, 119.9, 117.7, 62.5, 62.5, 62.4, 62.2,

29.7, 14.0, 13.9. IR (KBr)  $\nu$  3417, 2924, 1740, 1626, 1255, 758  $\text{cm}^{-1}$ . HRMS (ESI) calcd for  $\text{C}_{19}\text{H}_{24}\text{N}_3\text{O}_5$   $[\text{M}+\text{H}]^+$ : 374.1710, found: 374.1711.

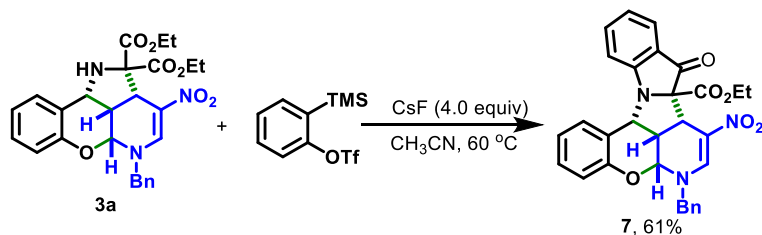

**General procedure for the formation of 7:** To a 5.0 mL vial were successively added **3a** (98.7 mg, 0.2 mmol), benzyne precursor (0.40 mmol), CsF (0.80 mmol) and 2.0 mL of  $\text{CH}_3\text{CN}$ . The resulting mixture was stirred at 60  $^\circ\text{C}$  for 5 h, and then the reaction mixture was directly subjected to flash column chromatography on silica gel (petroleum ether/ ethyl acetate) to afford the corresponding product **7**.

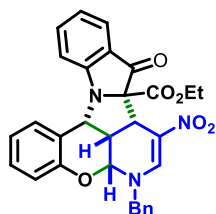

Ethyl

6-benzyl-8-nitro-9-oxo-5a,1,6,8a,13c-tetrahydro-9H-5-oxa-6,13b-diazaindeno[1,2-a]aceanthrylene-8b(5aH)-carboxylate (**7**)

Yellow solid obtained by column chromatography (petroleum ether/ethyl acetate = 5:1); 63.8 mg, 61% yield; dr > 20:1; reaction time = 5 h; mp 130.2-130.7  $^\circ\text{C}$ ;  $^1\text{H}$  NMR (400 MHz,  $\text{DMSO}-d_6$ ,  $\text{CDCl}_3$ )  $\delta$  8.59 (s, 1H), 7.68 (t,  $J = 8.0$  Hz, 2H), 7.54 (d,  $J = 4.0$  Hz, 1H), 7.47 (d,  $J = 8.0$  Hz, 1H), 7.37-7.29 (m, 5H), 7.25 (t,  $J = 8.0$  Hz, 1H), 7.12 (t,  $J = 8.0$  Hz, 1H), 7.02 (t,  $J = 8.0$  Hz, 1H), 6.77 (d,  $J = 8.0$  Hz, 1H), 5.17 (d,  $J = 8.0$  Hz, 1H), 4.83 (d,  $J = 4.0$  Hz, 2H), 4.75 (d,  $J = 8.0$  Hz, 1H), 3.81-3.69 (m, 3H), 3.55-3.49 (m, 1H), 0.80 (t,  $J = 8.0$  Hz, 3H);  $^{13}\text{C}$  NMR (100 MHz,  $\text{DMSO}-d_6$ ,  $\text{CDCl}_3$ )  $\delta$  167.8, 167.1, 156.9, 143.1, 138.3, 136.6, 129.6, 129.2, 122.9, 120.5, 119.9, 117.7, 62.5, 62.5, 62.4, 62.2, 29.7, 14.0, 13.9. IR (KBr)  $\nu$  3417, 2924, 1740, 1626, 1255, 758  $\text{cm}^{-1}$ . HRMS (ESI) calcd for  $\text{C}_{19}\text{H}_{24}\text{N}_3\text{O}_5$   $[\text{M}+\text{H}]^+$ : 374.1710, found: 374.1711.

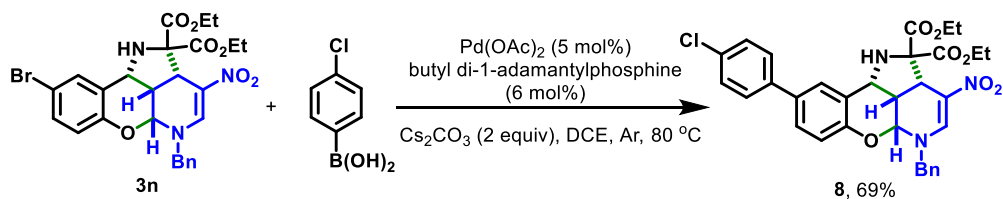

**General procedure for the formation of 8:** Under nitrogen atmosphere, compound **3n** (114.5 mg, 0.2 mmol), 4-chlorophenyl boronic acid (46.9 mg, 0.3 mmol, 1.5 equiv), Cs<sub>2</sub>CO<sub>3</sub> (130.3 mg, 0.4 mmol, 2.0 equiv), Pd(OAc)<sub>2</sub> (0.05 equiv) and butyl di-1-adamantylphosphine (0.06 equiv) were successively added to a 15 mL dried tube, followed by addition of 2.0 mL DME. The resulting mixture was stirred at 80 °C for 24 h, and then the reaction mixture was directly subjected to silica gel column chromatography (petroleum ether/ ethyl acetate as eluent) to afford the corresponding product **8** as brown oil in 69% yield.

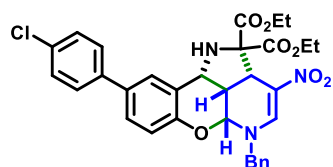

Diethyl

5-benzyl-9-(4-chlorophenyl)-3-nitro-1,2a,2a1,5,5a,10b-hexahydro-2H-6-oxa-1,5-diazaaceanthrylene-2,2-dicarboxylate (**8**)

Brown oil obtained by column chromatography (petroleum ether/ethyl acetate = 3:1); 83.5 mg, 69% yield; dr > 20:1; reaction time = 24 h; <sup>1</sup>H NMR (400 MHz, CDCl<sub>3</sub>) δ 8.26 (s, 1H), 7.45-7.33 (m, 9H), 7.27 (d, *J* = 8.0 Hz, 2H), 6.94 (d, *J* = 8.0 Hz, 1H), 4.94 (dd, *J*<sub>1</sub> = 4.0 Hz, *J*<sub>2</sub> = 8.0 Hz, 1H), 4.75 (d, *J* = 12.0 Hz, 1H), 4.64-4.59 (m, 2H), 4.48 (d, *J* = 8.0 Hz, 1H), 4.26 (q, *J* = 8.0 Hz, 2H), 4.11-4.03 (m, 1H), 3.94-3.86 (m, 1H), 3.11-3.05 (m, 1H), 2.92 (s, 1H), 1.26 (t, *J* = 8.0 Hz, 3H), 1.06 (t, *J* = 8.0 Hz, 3H); <sup>13</sup>C NMR (100 MHz, CDCl<sub>3</sub>) δ 191.9, 164.8, 162.0, 155.9, 144.3, 137.6, 136.2, 129.3, 128.9, 128.5, 128.4, 127.9, 127.7, 125.0, 123.6, 120.9, 120.7, 118.2, 117.8, 112.8, 84.1, 81.5, 60.7, 59.4, 56.9, 45.4, 38.0, 13.4. IR (KBr) ν 3440, 2927, 2377, 1742, 1642, 1304, 753 cm<sup>-1</sup>. HRMS (ESI) calcd for C<sub>30</sub>H<sub>26</sub>N<sub>3</sub>O<sub>6</sub> [M+H]<sup>+</sup>: 524.1816, found: 524.1814.

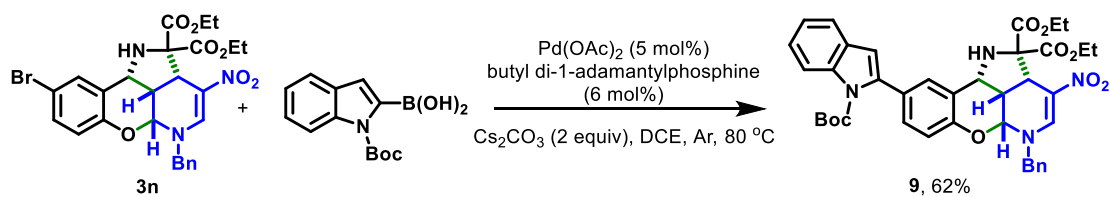

**General procedure for the formation of 9:** Under nitrogen atmosphere, compound **3n**

(114.5 mg, 0.2 mmol), *N*-Boc 2-indolyl boronic acid (78.3 mg, 0.3 mmol, 1.5 equiv), Cs<sub>2</sub>CO<sub>3</sub> (130.3 mg, 0.4 mmol, 2.0 equiv), Pd(OAc)<sub>2</sub> (0.05 equiv) and butyl di-1-adamantylphosphine (0.06 equiv) were successively added to a 15 mL dried tube, followed by addition of 2.0 mL DME. The resulting mixture was stirred at 80 °C for 6 h, and then the reaction mixture was directly subjected to silica gel column chromatography (petroleum ether/ ethyl acetate as eluent) to afford the corresponding product **9** as brown oil in 62% yield.

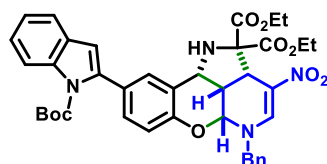

Diethyl

5-benzyl-9-(1-(tert-butoxycarbonyl)-1*H*-indol-2-yl)-3-nitro-1,2a,2a1,5,5a,10b-hexahydro-2*H*-6-oxa-1,5-diazaaceanthrylene-2,2-dicarboxylate (**9**)

Yellow oil obtained by column chromatography (petroleum ether/ethyl acetate = 3:1); 88.5 mg, 62% yield; dr > 20:1; reaction time = 6 h; <sup>1</sup>H NMR (400 MHz, CDCl<sub>3</sub>) δ 8.27 (s, 1H), 8.15 (d, *J* = 12.0 Hz, 1H), 7.54 (d, *J* = 8.0 Hz, 1H), 7.40-7.22 (m, 9H), 6.92 (d, *J* = 8.0 Hz, 1H), 6.53 (s, 1H), 4.89 (d, *J* = 8.0 Hz, 1H), 4.75 (d, *J* = 16.0 Hz, 1H), 4.61 (d, *J* = 8.0 Hz, 1H), 4.58 (d, *J* = 4.0 Hz, 1H), 4.55 (d, *J* = 8.0 Hz, 1H), 4.27 (q, *J* = 8.0 Hz, 2H), 4.14-4.06 (m, 1H), 3.98-3.90 (m, 1H), 3.08-3.02 (m, 1H), 2.91 (s, 1H), 1.38 (s, 9H), 1.27 (t, *J* = 8.0 Hz, 3H), 1.09 (t, *J* = 8.0 Hz, 3H); <sup>13</sup>C NMR (100 MHz, CDCl<sub>3</sub>) δ 170.9, 168.7, 154.7, 150.0, 142.2, 139.5, 137.2, 134.6, 130.5, 129.6, 129.1, 129.1, 128.7, 128.7, 128.2, 127.7, 124.3, 123.9, 122.9, 120.4, 117.1, 115.2, 110.2, 83.4, 83.0, 74.8, 62.5, 61.7, 57.8, 57.8, 42.2, 41.6, 27.7, 13.8, 13.5. IR (KBr) ν 3434, 2924, 1734, 1641, 1320, 750 cm<sup>-1</sup>. HRMS (ESI) calcd for C<sub>39</sub>H<sub>41</sub>N<sub>4</sub>O<sub>9</sub> [M+H]<sup>+</sup>: 709.2868, found: 709.2882.

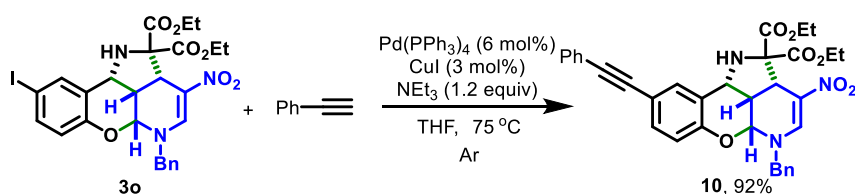

**General procedure for the formation of 10:** Under nitrogen atmosphere, compound **3o** (123.9 mg, 0.2 mmol), Pd(PPh<sub>3</sub>)<sub>4</sub> (0.06 equiv), CuI (0.05 equiv), phenylacetylene (24.5 mg, 1.2 equiv) and NEt<sub>3</sub> (24.3 mg, 1.2 equiv) were successively added to a 15 mL dried tube, followed by addition of 2.0 mL THF. The resulting mixture was stirred at 75 °C for 24 h, and then the reaction mixture was directly subjected to silica gel column chromatography (petroleum ether/ ethyl

acetate as eluent) to afford the corresponding product **10** as brown solid in 92% yield.

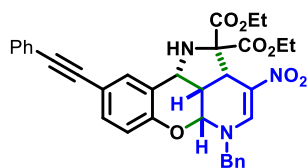

Diethyl

5-benzyl-3-nitro-9-(phenylethynyl)-hexahydro-2H-6-oxa-1,5-diazaaceanthrylene-2,2-dicarboxylate (**10**)

Brown solid obtained by column chromatography (petroleum ether/ethyl acetate = 3:1); 109.2 mg, 92% yield; dr > 20:1; reaction time = 24 h; mp 98.3-98.7 °C; <sup>1</sup>H NMR (400 MHz, CDCl<sub>3</sub>) δ 8.23 (s, 1H), 7.50-7.46 (m, 2H), 7.41 (d, *J* = 4.0 Hz, 1H), 7.38-7.31 (m, 7H), 7.25 (d, *J* = 4.0 Hz, 1H), 7.23 (d, *J* = 4.0 Hz, 1H), 6.82 (d, *J* = 8.0 Hz, 1H), 4.87 (d, *J* = 8.0 Hz, 1H), 4.71 (d, *J* = 16.0 Hz, 1H), 4.60 (s, 1H), 4.58 (d, *J* = 12.0 Hz, 1H), 4.41 (d, *J* = 8.0 Hz, 1H), 4.31-4.19 (m, 2H), 4.08-4.00 (m, 1H), 3.87-3.79 (m, 1H), 3.08-3.02 (m, 1H), 2.85 (s, 1H), 1.25 (t, *J* = 8.0 Hz, 3H), 1.03 (t, *J* = 8.0 Hz, 3H); <sup>13</sup>C NMR (100 MHz, CDCl<sub>3</sub>) δ 170.8, 168.5, 155.0, 142.2, 134.6, 132.5, 132.0, 131.5, 129.2, 128.7, 128.3, 128.3, 128.2, 128.1, 124.2, 123.0, 118.8, 117.7, 89.0, 88.4, 82.9, 74.6, 62.7, 61.7, 57.9, 57.4, 42.3, 41.1, 13.8, 13.5. IR (KBr) ν 3418, 2928, 1734, 1638, 1263, 751 cm<sup>-1</sup>. HRMS (ESI) calcd for C<sub>34</sub>H<sub>32</sub>N<sub>3</sub>O<sub>7</sub> [M+H]<sup>+</sup>: 594.2235, found: 594.2242.

## 5. Crystal structures

### 5.1 Crystal structure of **3n**

Preparation of the single crystals of **3n**: 15.0 mg of pure compound **3n** was dissolved in the combined solvents of dichloromethane and methanol (3 mL, v/v = 1:2) at room temperature. The bottle was sealed by a piece of plastic film with several tiny holes, thus allowing slow evaporation of the solvents at 0 °C. After about one day, several small particles were observed at the bottom of the bottle. The crystals were chosen and subjected to the single crystal X-ray diffraction analysis for the determination of the structure and relative configuration of **3n**. The data were collected by a Bruker D8 VENTURE PHOTON II CCD diffractometer at 273.0 K.

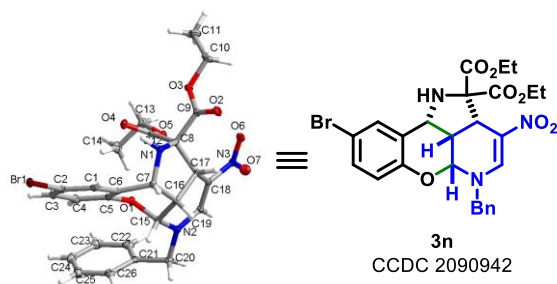

Table S1. Crystal data and structure refinement for **3n**.

Bond precision: C-C = 0.0029 Å Wavelength = 0.71073

Cell: a = 11.194(5) b = 12.288(3) c = 18.063(6)

alpha = 90 beta = 95.088(14) gamma = 90

Temperature: 150 K

|                        | Calculated                                                      | Reported                                                        |
|------------------------|-----------------------------------------------------------------|-----------------------------------------------------------------|
| Volume                 | 2474.8(15)                                                      | 2474.7(16)                                                      |
| Space group            | P 21/n                                                          | P 1 21/n 1                                                      |
| Hall group             | -P 2yn                                                          | -P 2yn                                                          |
| Moiety formula         | C <sub>26</sub> H <sub>26</sub> BrN <sub>3</sub> O <sub>7</sub> | C <sub>26</sub> H <sub>26</sub> BrN <sub>3</sub> O <sub>7</sub> |
| Sum formula            | C <sub>26</sub> H <sub>26</sub> BrN <sub>3</sub> O <sub>7</sub> | C <sub>26</sub> H <sub>26</sub> BrN <sub>3</sub> O <sub>7</sub> |
| Mr                     | 572.40                                                          | 572.41                                                          |
| Dx, g cm <sup>-3</sup> | 1.536                                                           | 1.536                                                           |
| Z                      | 4                                                               | 4                                                               |
| Mu (mm <sup>-1</sup> ) | 1.714                                                           | 1.714                                                           |
| F000                   | 1176.0                                                          | 1176.0                                                          |
| F000'                  | 1175.40                                                         |                                                                 |
| h,k,lmax               | 13,15,22                                                        | 13,15,22                                                        |
| Nref                   | 5060                                                            | 5059                                                            |
| Tmin,Tmax              | 0.742,0.814                                                     | 0.669,0.746                                                     |
| Tmin'                  | 0.691                                                           |                                                                 |

Correction method= # Reported T Limits: Tmin=0.669 Tmax=0.746 AbsCorr =



## MULTI-SCAN

Data completeness= 1.000

Theta(max)= 26.368

R(reflections)= 0.0263( 4318)

wR<sub>2</sub>(reflections)= 0.0603( 5059)

S = 1.028

Npar = 340

## 5.2 Crystal structure of **3aa**

Preparation of the single crystals of **3aa**: 15.0 mg of pure compound **3aa** was dissolved in the combined solvents of dichloromethane and methanol (3 mL, v/v = 1:2) at room temperature. The bottle was sealed by a piece of plastic film with several tiny holes, thus allowing slow evaporation of the solvents at 0 °C. After about one day, several small particles were observed at the bottom of the bottle. The crystals were chosen and subjected to the single crystal X-ray diffraction analysis for the determination of the structure and relative configuration of **3aa**. The data were collected by a SuperNova, Dual, Cu at zero, AtlasS2 diffractometer. The crystal was kept at 150.00(10) K during data collection.

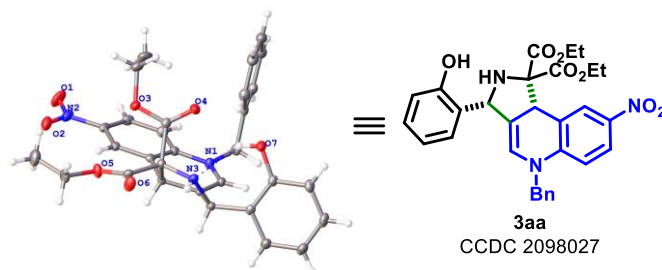

Table S2. Crystal data and structure refinement for **3aa**.

|                     |                                                               |
|---------------------|---------------------------------------------------------------|
| Identification code | <b>3aa</b>                                                    |
| Empirical formula   | C <sub>30</sub> H <sub>29</sub> N <sub>3</sub> O <sub>7</sub> |
| Formula weight      | 543.56                                                        |
| Temperature/K       | 150.00(10)                                                    |
| Crystal system      | triclinic                                                     |
| Space group         | P-1                                                           |
| a/Å                 | 8.9802(5)                                                     |
| b/Å                 | 12.3650(6)                                                    |
| c/Å                 | 12.6363(6)                                                    |

|                                                |                                                               |
|------------------------------------------------|---------------------------------------------------------------|
| $\alpha/^\circ$                                | 109.475(4)                                                    |
| $\beta/^\circ$                                 | 94.551(4)                                                     |
| $\gamma/^\circ$                                | 90.087(4)                                                     |
| Volume/ $\text{\AA}^3$                         | 1318.10(12)                                                   |
| Z                                              | 2                                                             |
| $\rho_{\text{calc}}/\text{g/cm}^3$             | 1.370                                                         |
| $\mu/\text{mm}^{-1}$                           | 0.099                                                         |
| F(000)                                         | 572.0                                                         |
| Crystal size/ $\text{mm}^3$                    | $0.13 \times 0.1 \times 0.08$                                 |
| Radiation                                      | Mo K $\alpha$ ( $\lambda = 0.71073$ )                         |
| 2 $\Theta$ range for data collection/ $^\circ$ | 3.996 to 49.994                                               |
| Index ranges                                   | $-10 \leq h \leq 10, -14 \leq k \leq 13, -15 \leq l \leq 14$  |
| Reflections collected                          | 9912                                                          |
| Independent reflections                        | 4641 [ $R_{\text{int}} = 0.0303, R_{\text{sigma}} = 0.0467$ ] |
| Data/restraints/parameters                     | 4641/0/380                                                    |
| Goodness-of-fit on $F^2$                       | 1.030                                                         |
| Final R indexes [ $I \geq 2\sigma(I)$ ]        | $R_1 = 0.0414, wR_2 = 0.0938$                                 |
| Final R indexes [all data]                     | $R_1 = 0.0561, wR_2 = 0.1039$                                 |
| Largest diff. peak/hole / $e \text{\AA}^{-3}$  | 0.19/-0.18                                                    |

### 5.3 Crystal structure of **4**

Preparation of the single crystals of **4**: 10.0 mg of pure compound **4** was dissolved in the combined solvents of dichloromethane and methanol (2 mL, v/v = 1:1) at room temperature. The bottle was sealed by a piece of plastic film with several tiny holes, thus allowing slow evaporation of the solvents at 0 °C. After about two days, several small particles were observed at the bottom of the bottle. The crystals were chosen and subjected to the single crystal X-ray diffraction analysis for the determination of the structure and relative configuration of **4**. The data were collected by a Bruker D8 QUEST PHOTON II diffractometer at 273.0 K.

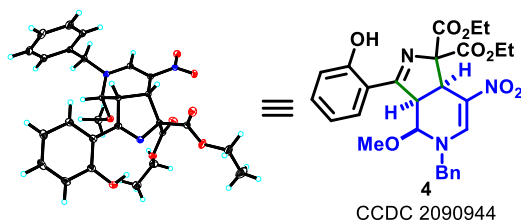

Table S3. Crystal data and structure refinement for **4**.

|                                 |                                                               |                   |
|---------------------------------|---------------------------------------------------------------|-------------------|
| Identification code             | global                                                        |                   |
| Empirical formula               | C <sub>27</sub> H <sub>29</sub> N <sub>3</sub> O <sub>8</sub> |                   |
| Formula weight                  | 523.53                                                        |                   |
| Temperature                     | 100(2) K                                                      |                   |
| Wavelength                      | 1.54178 Å                                                     |                   |
| Crystal system                  | Monoclinic                                                    |                   |
| Space group                     | P 1 21/n 1                                                    |                   |
| Unit cell dimensions            | a = 8.0690(2) Å                                               | α = 90 °          |
|                                 | b = 11.2404(3) Å                                              | β = 93.2810(10) ° |
|                                 | c = 27.7333(8) Å                                              | γ = 90 °          |
| Volume                          | 2511.25(12) Å <sup>3</sup>                                    |                   |
| Z                               | 4                                                             |                   |
| Density (calculated)            | 1.385 Mg/m <sup>3</sup>                                       |                   |
| Absorption coefficient          | 0.860 mm <sup>-1</sup>                                        |                   |
| F(000)                          | 1104                                                          |                   |
| Crystal size                    | 0.290 x 0.080 x 0.030 mm <sup>3</sup>                         |                   |
| Theta range for data collection | 3.19 to 72.20 °                                               |                   |
| Index ranges                    | -9 ≤ h ≤ 9, -13 ≤ k ≤ 13, -28 ≤ l ≤ 34                        |                   |
| Reflections collected           | 29794                                                         |                   |
| Independent reflections         | 4931 [R(int) = 0.0812]                                        |                   |
| Completeness to theta = 72.20 ° | 99.9 %                                                        |                   |
| Absorption correction           | Semi-empirical from equivalents                               |                   |
| Max. and min. transmission      | 0.97 and 0.85                                                 |                   |
| Refinement method               | Full-matrix least-squares on F <sup>2</sup>                   |                   |
| Data / restraints / parameters  | 4931 / 0 / 347                                                |                   |

|                                      |                                        |
|--------------------------------------|----------------------------------------|
| Goodness-of-fit on $F^2$             | 1.033                                  |
| Final R indices [ $I > 2\sigma(I)$ ] | $R_1 = 0.0535$ , $wR_2 = 0.1257$       |
| R indices (all data)                 | $R_1 = 0.0696$ , $wR_2 = 0.1361$       |
| Largest diff. peak and hole          | 1.307 and $-0.740 \text{ e. \AA}^{-3}$ |

#### 5.4 Crystal structure of **7**

Preparation of the single crystals of **7**: 8.0 mg of pure compound **7** was dissolved in the combined solvents of chloroform and methanol (1 mL, v/v = 2:1) at room temperature. The bottle was sealed by a piece of plastic film with several tiny holes, thus allowing slow evaporation of the solvents at 10 °C. After about two days, several small particles were observed at the bottom of the bottle. The crystals were chosen and subjected to the single crystal X-ray diffraction analysis for the determination of the structure and relative configuration of **7**. The data were collected by a SuperNova, Dual, Cu at zero, AtlasS2 diffractometer. The crystal was kept at 149.99(10) K during data collection.

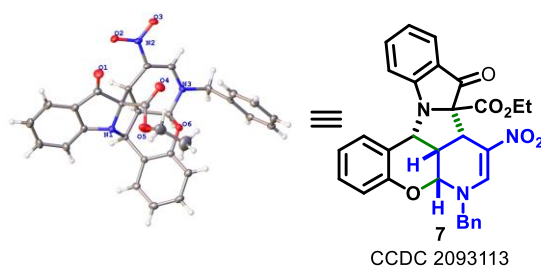

Table S4. Crystal data and structure refinement for **7**.

|                     |                          |
|---------------------|--------------------------|
| Identification code | <b>7</b>                 |
| Empirical formula   | $C_{31}H_{26}Cl_3N_3O_6$ |
| Formula weight      | 642.90                   |
| Temperature/K       | 149.99(10)               |
| Crystal system      | orthorhombic             |
| Space group         | $P2_12_12_1$             |
| $a/\text{\AA}$      | 8.9528(3)                |
| $b/\text{\AA}$      | 12.4499(5)               |
| $c/\text{\AA}$      | 26.0558(12)              |
| $\alpha/^\circ$     | 90                       |

|                                               |                                                               |
|-----------------------------------------------|---------------------------------------------------------------|
| $\beta/^\circ$                                | 90                                                            |
| $\gamma/^\circ$                               | 90                                                            |
| Volume/ $\text{\AA}^3$                        | 2904.2(2)                                                     |
| Z                                             | 4                                                             |
| $\rho_{\text{calc}}/\text{g}/\text{cm}^3$     | 1.470                                                         |
| $\mu/\text{mm}^{-1}$                          | 3.287                                                         |
| F(000)                                        | 1328.0                                                        |
| Crystal size/ $\text{mm}^3$                   | $0.14 \times 0.12 \times 0.11$                                |
| Radiation                                     | Cu K $\alpha$ ( $\lambda = 1.54184$ )                         |
| $2\Theta$ range for data collection/ $^\circ$ | 7.87 to 147.802                                               |
| Index ranges                                  | $-7 \leq h \leq 10, -15 \leq k \leq 15, -31 \leq l \leq 23$   |
| Reflections collected                         | 7183                                                          |
| Independent reflections                       | 4952 [ $R_{\text{int}} = 0.0526, R_{\text{sigma}} = 0.0819$ ] |
| Data/restraints/parameters                    | 4952/38/409                                                   |
| Goodness-of-fit on $F^2$                      | 1.050                                                         |
| Final R indexes [ $I \geq 2\sigma(I)$ ]       | $R_1 = 0.0624, wR_2 = 0.1571$                                 |
| Final R indexes [all data]                    | $R_1 = 0.0721, wR_2 = 0.1694$                                 |
| Largest diff. peak/hole / $e \text{\AA}^{-3}$ | 0.50/-0.39                                                    |
| Flack parameter                               | 0.01(2)                                                       |

## 6. NMR spectra

$^1\text{H}$  NMR spectrum of **3a** (400 MHz,  $\text{CDCl}_3$ )

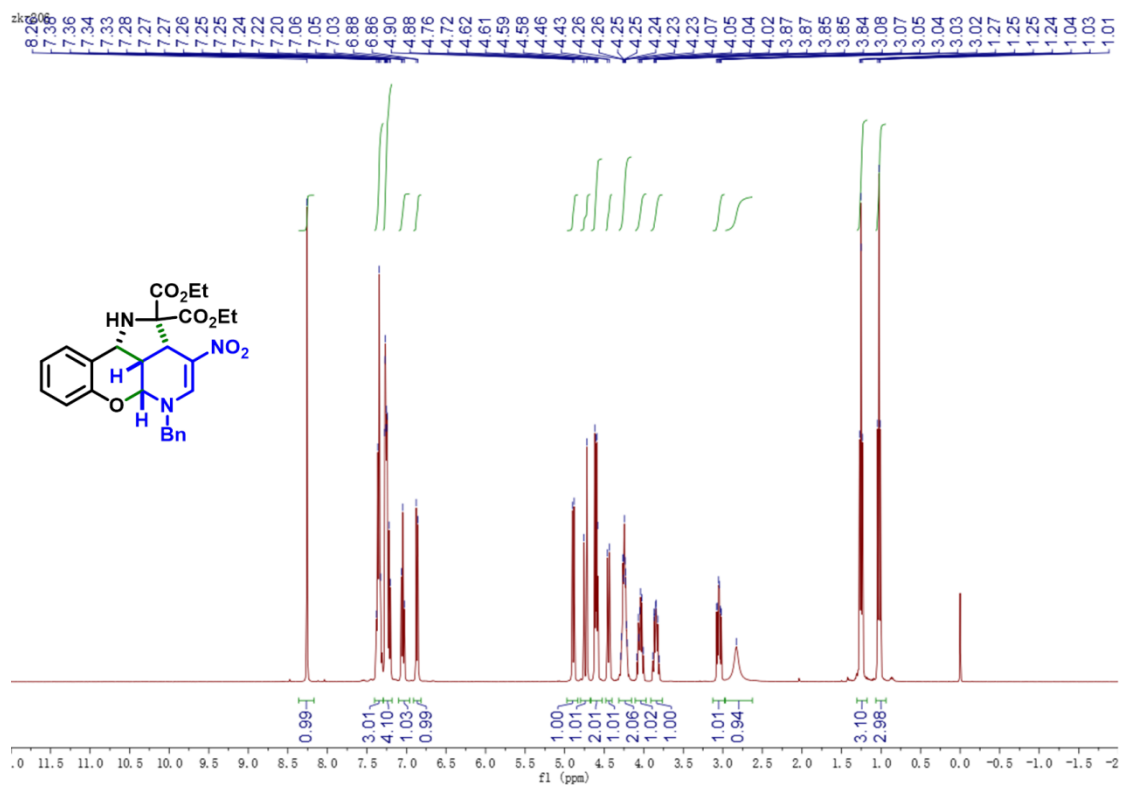

$^{13}\text{C}$  NMR spectrum of **3a** (100 MHz,  $\text{CDCl}_3$ )

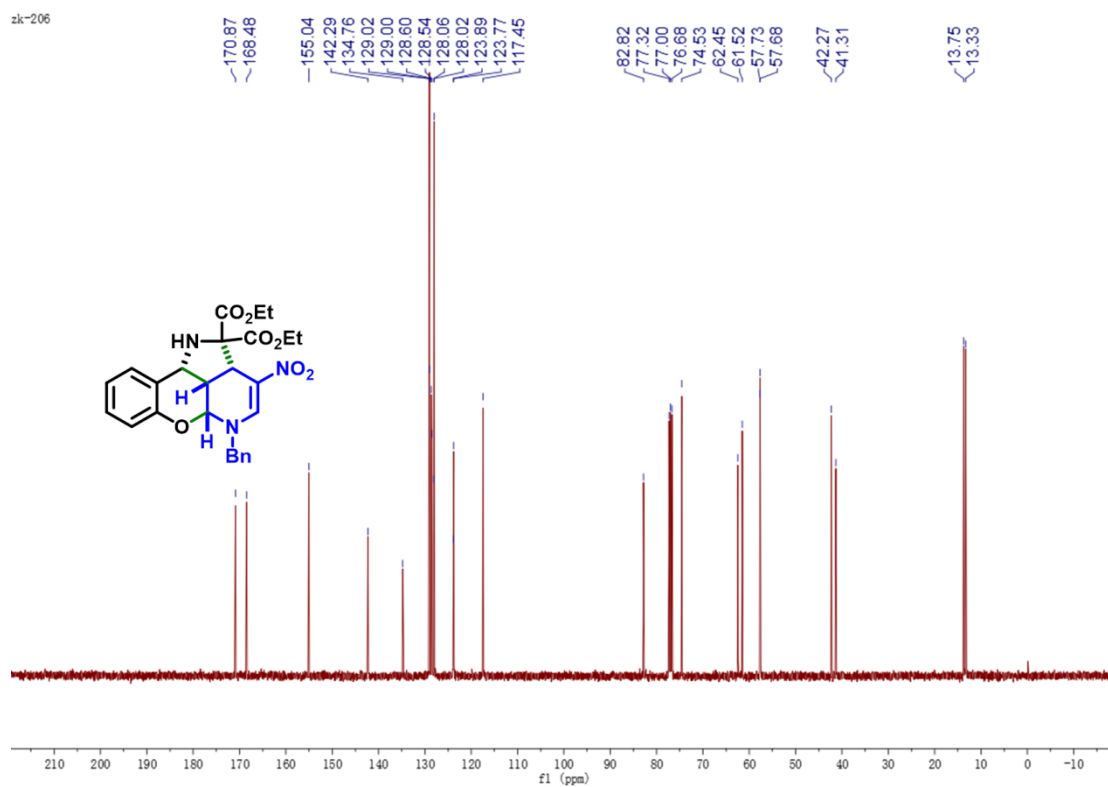

<sup>1</sup>H NMR spectrum of **3b** (400 MHz, CDCl<sub>3</sub>)

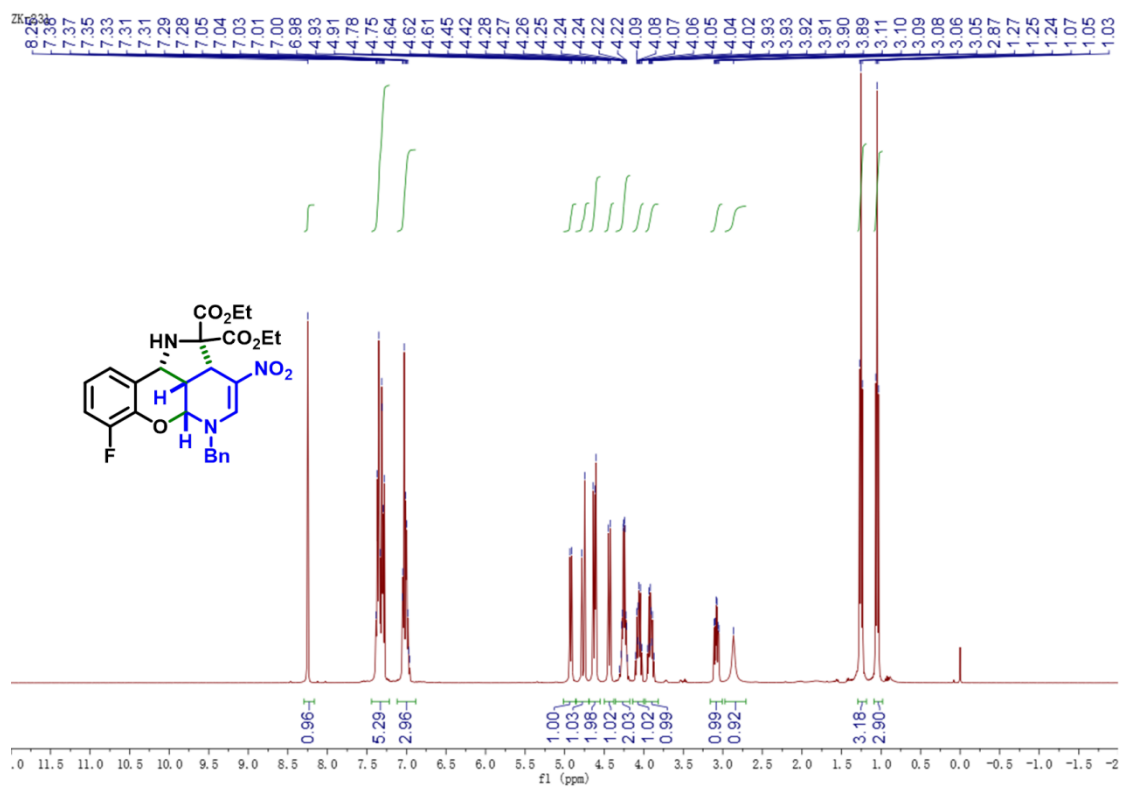

<sup>13</sup>C NMR spectrum of **3b** (100 MHz, CDCl<sub>3</sub>)

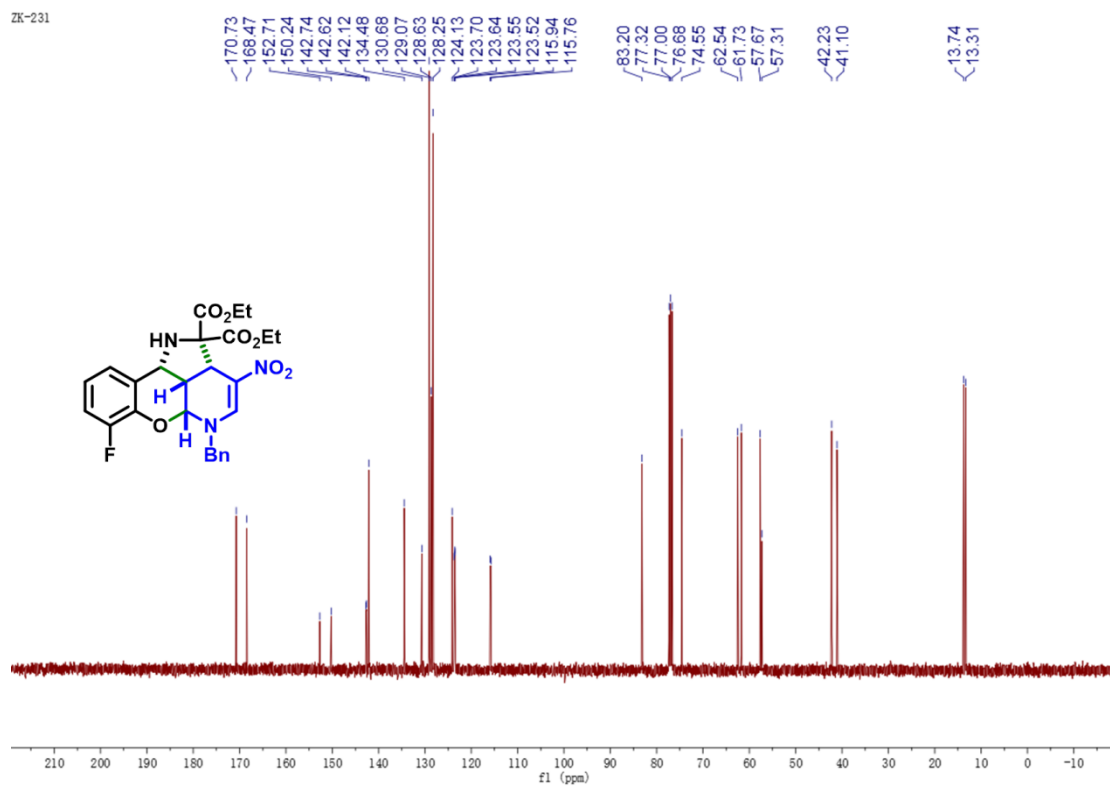

$^{19}\text{F}$  NMR spectrum of **3b** (375 MHz,  $\text{CDCl}_3$ )

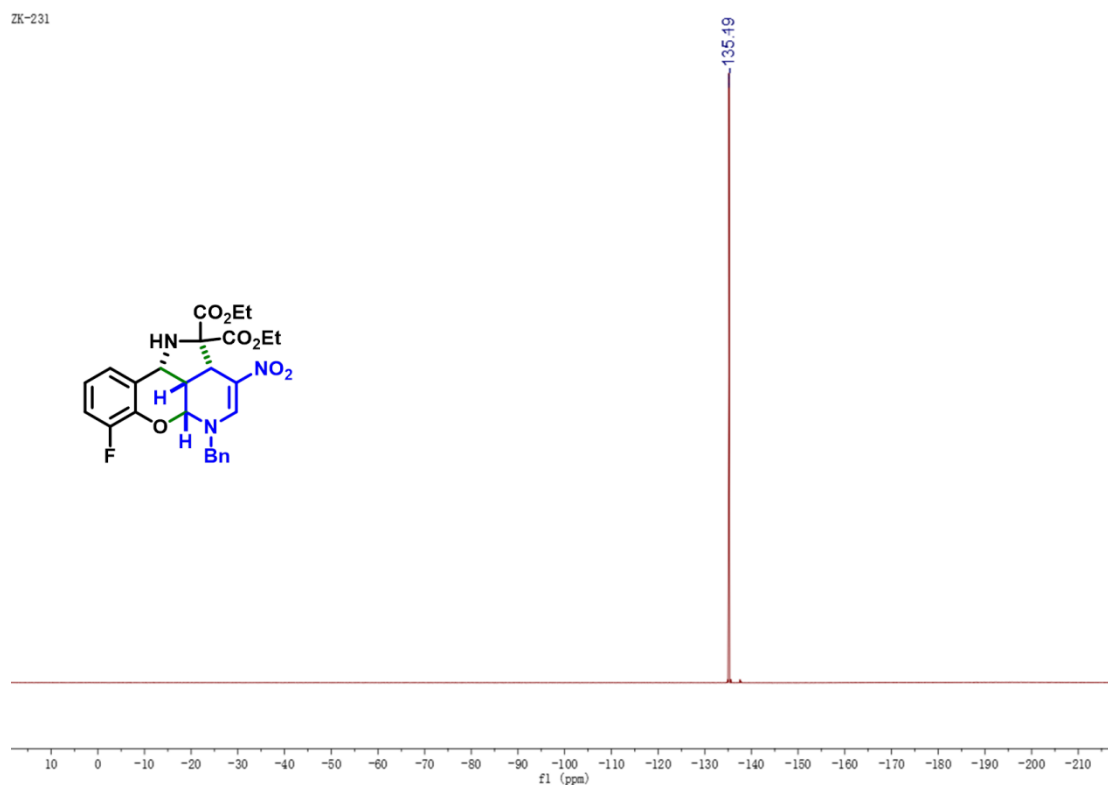

$^1\text{H}$  NMR spectrum of **3c** (400 MHz,  $\text{CDCl}_3$ )

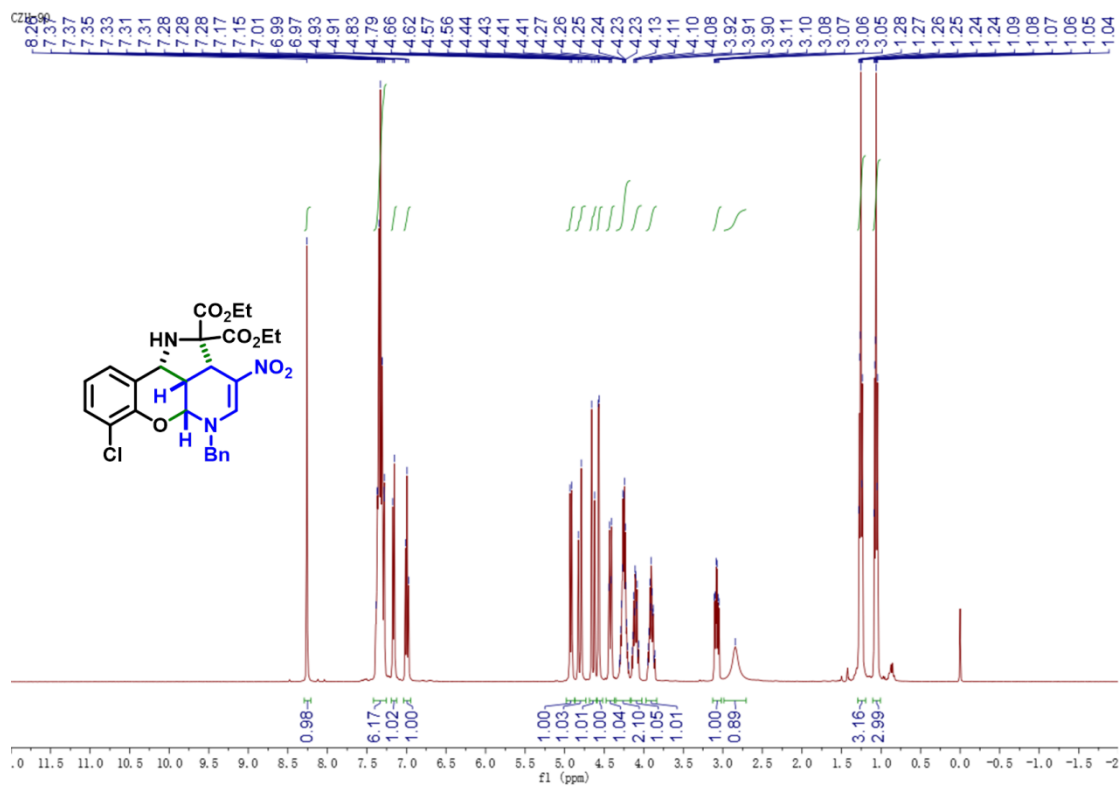



<sup>13</sup>C NMR spectrum of **3c** (100 MHz, CDCl<sub>3</sub>)

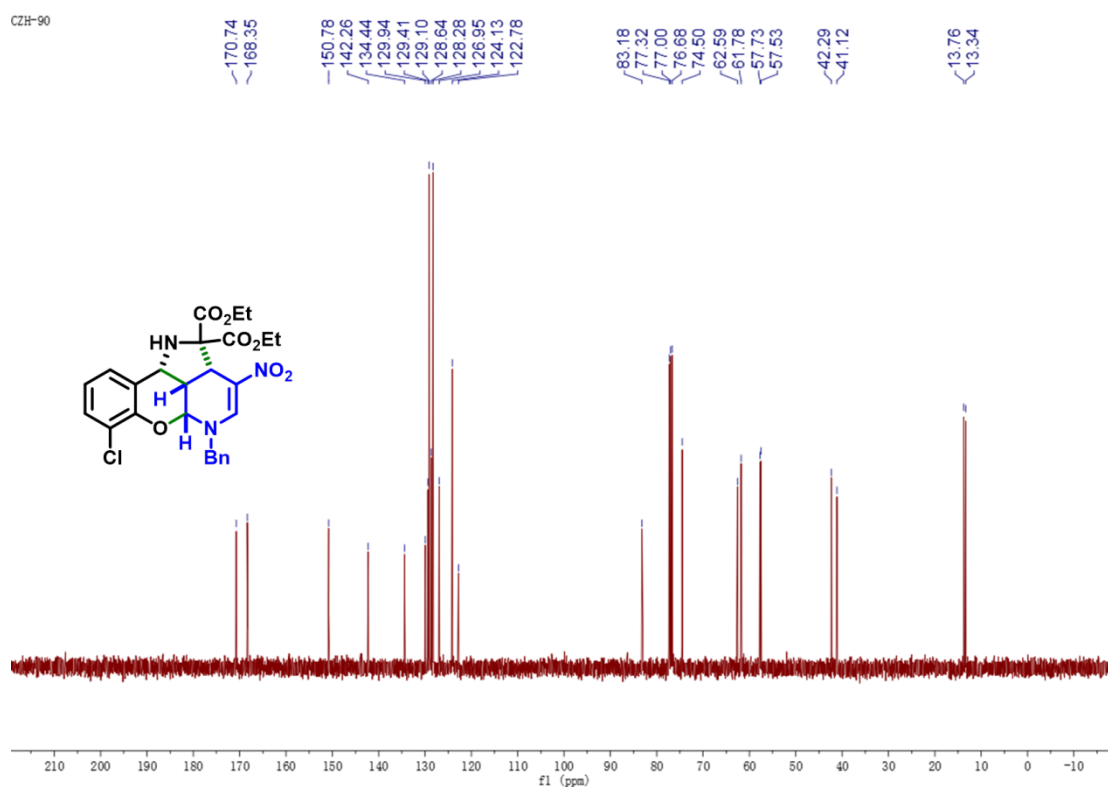

<sup>1</sup>H NMR spectrum of **3d** (400 MHz, CDCl<sub>3</sub>)

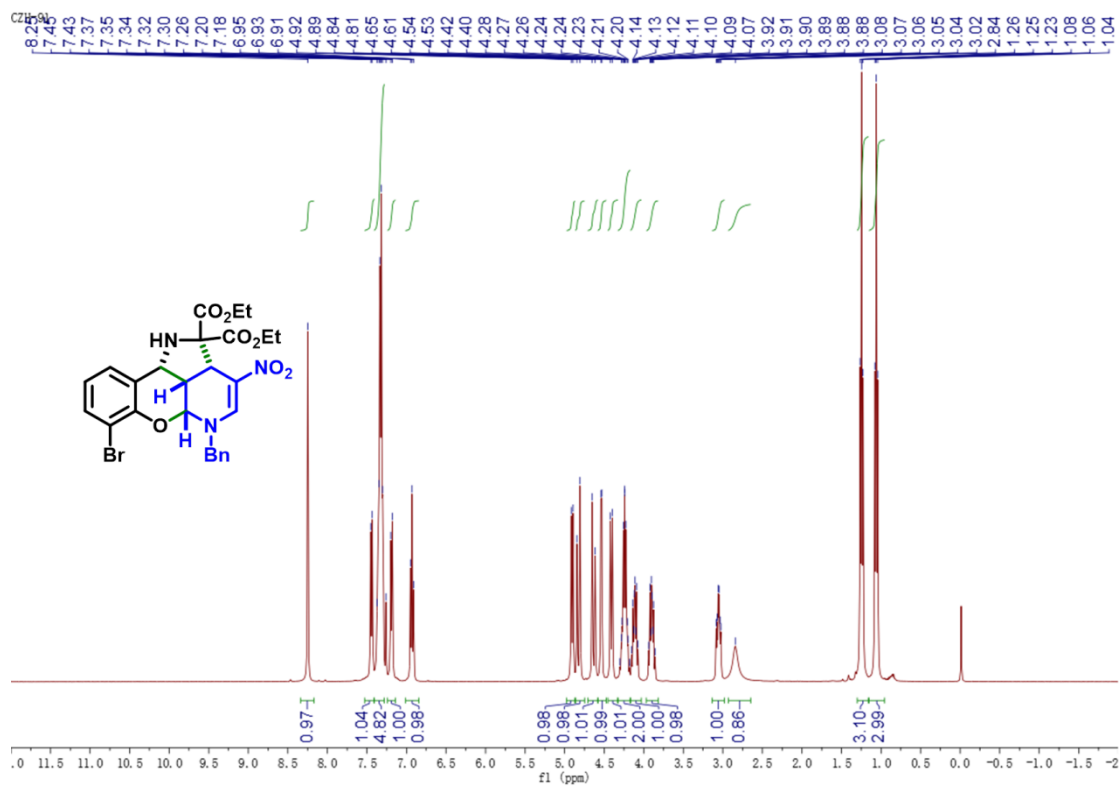

$^{13}\text{C}$  NMR spectrum of **3d** (100 MHz,  $\text{CDCl}_3$ )

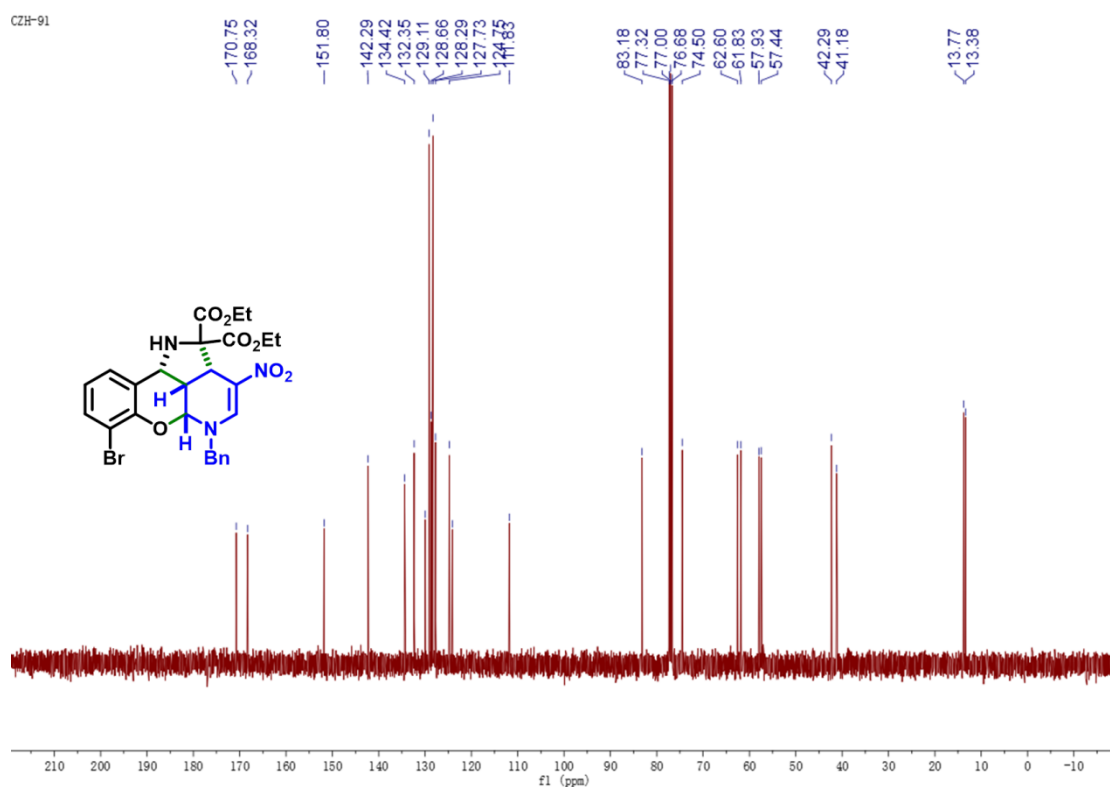

$^1\text{H}$  NMR spectrum of **3e** (400 MHz,  $\text{CDCl}_3$ )

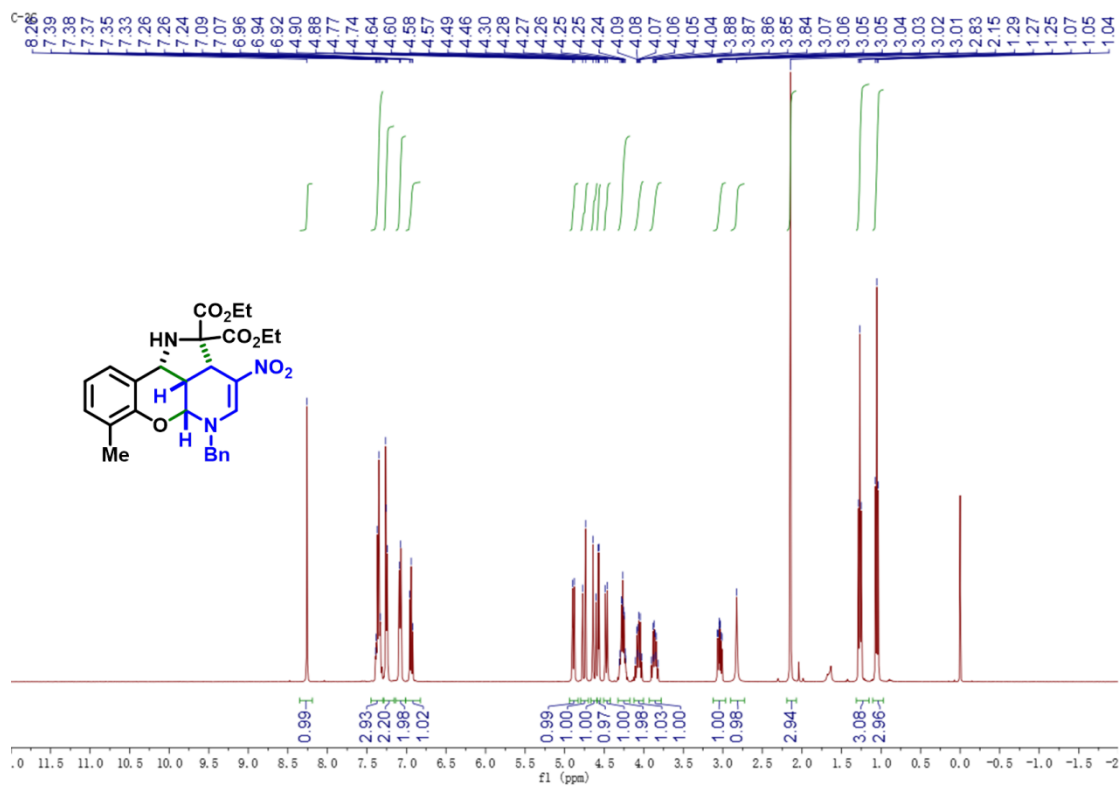

<sup>13</sup>C NMR spectrum of **3e** (100 MHz, CDCl<sub>3</sub>)

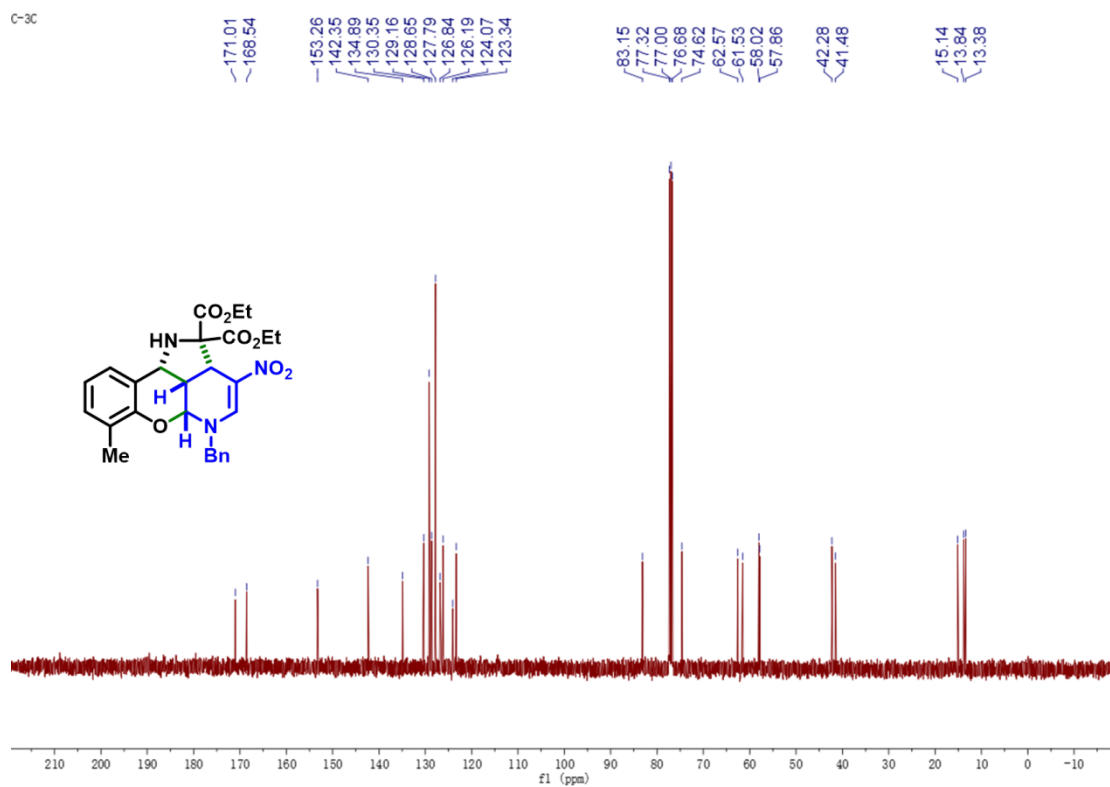

<sup>1</sup>H NMR spectrum of **3f** (400 MHz, CDCl<sub>3</sub>)

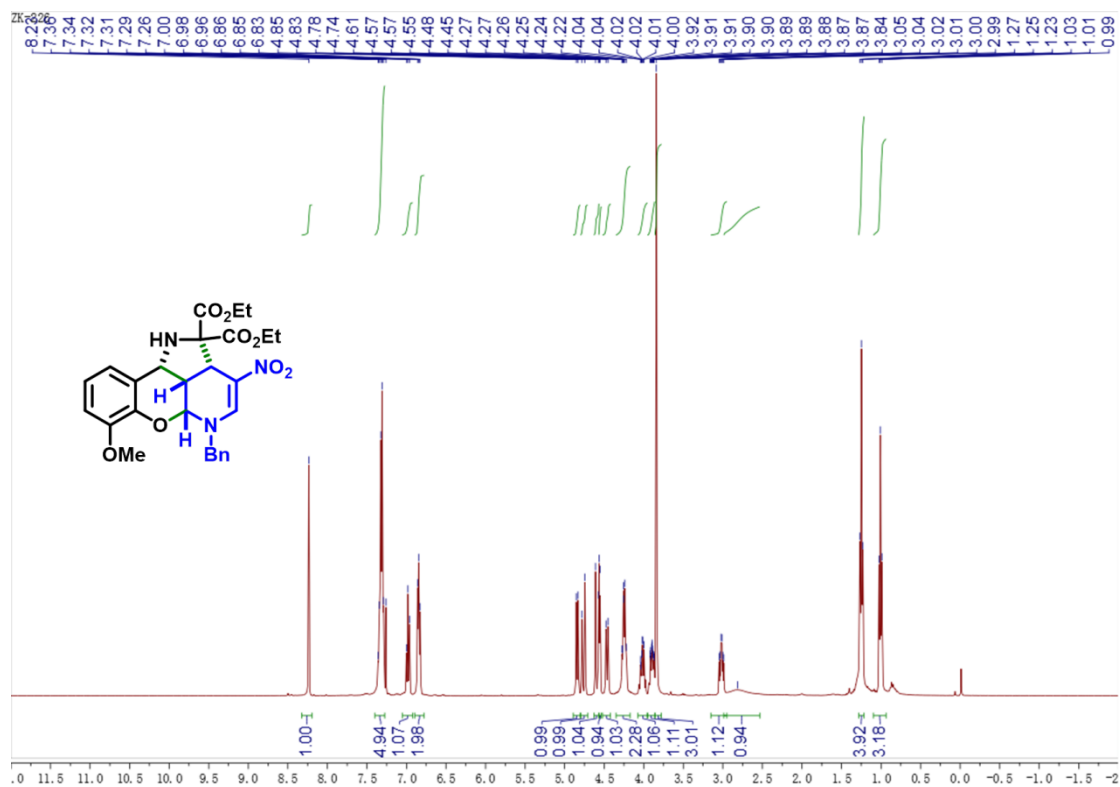

<sup>13</sup>C NMR spectrum of **3f** (100 MHz, CDCl<sub>3</sub>)

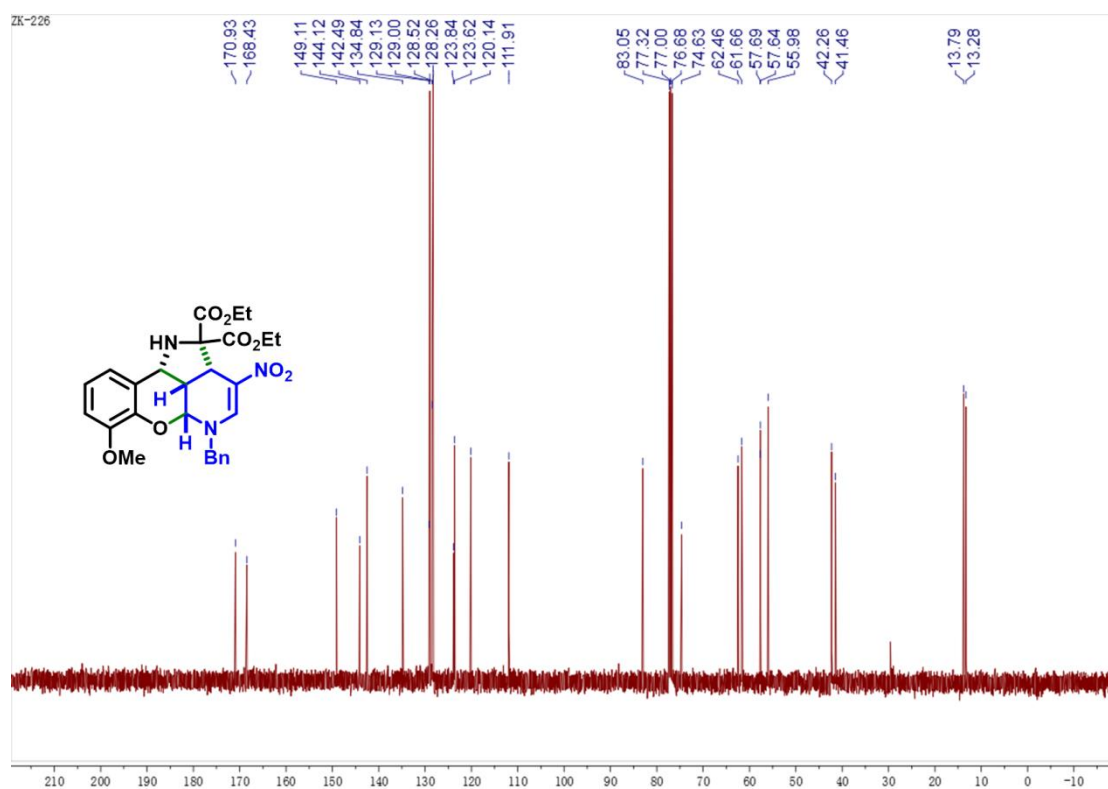

<sup>1</sup>H NMR spectrum of **3g** (400 MHz, CDCl<sub>3</sub>)

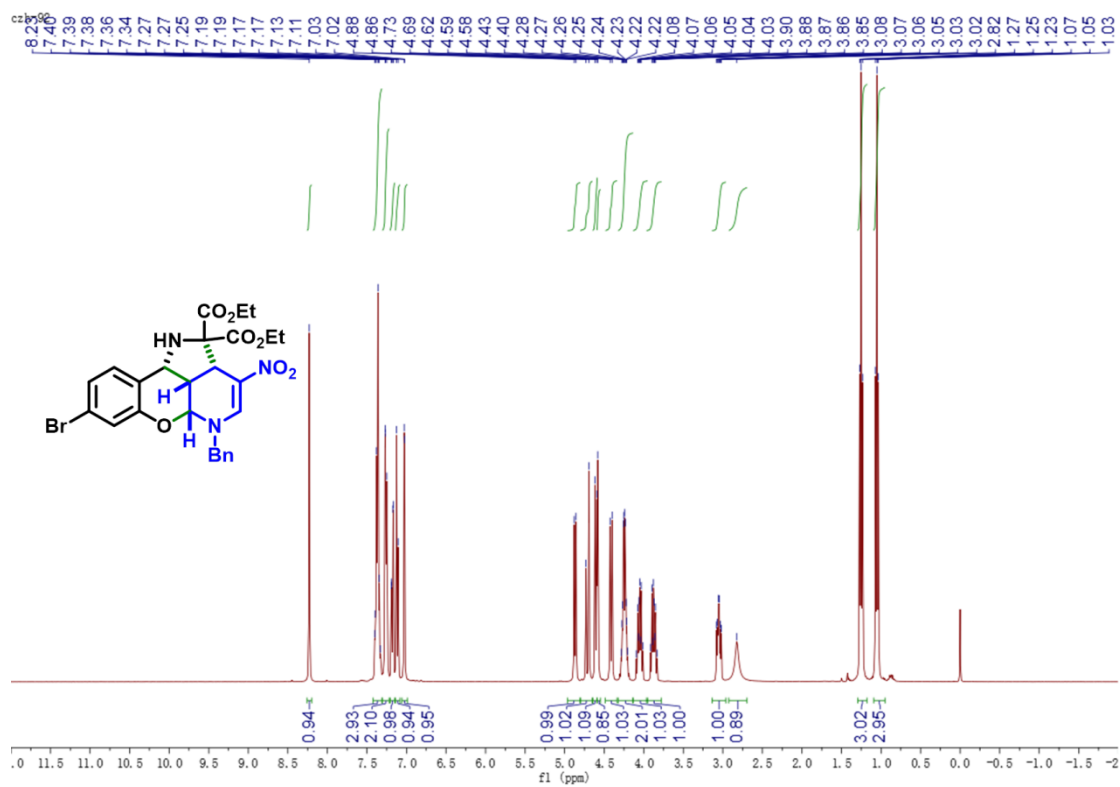

<sup>13</sup>C NMR spectrum of **3g** (100 MHz, CDCl<sub>3</sub>)

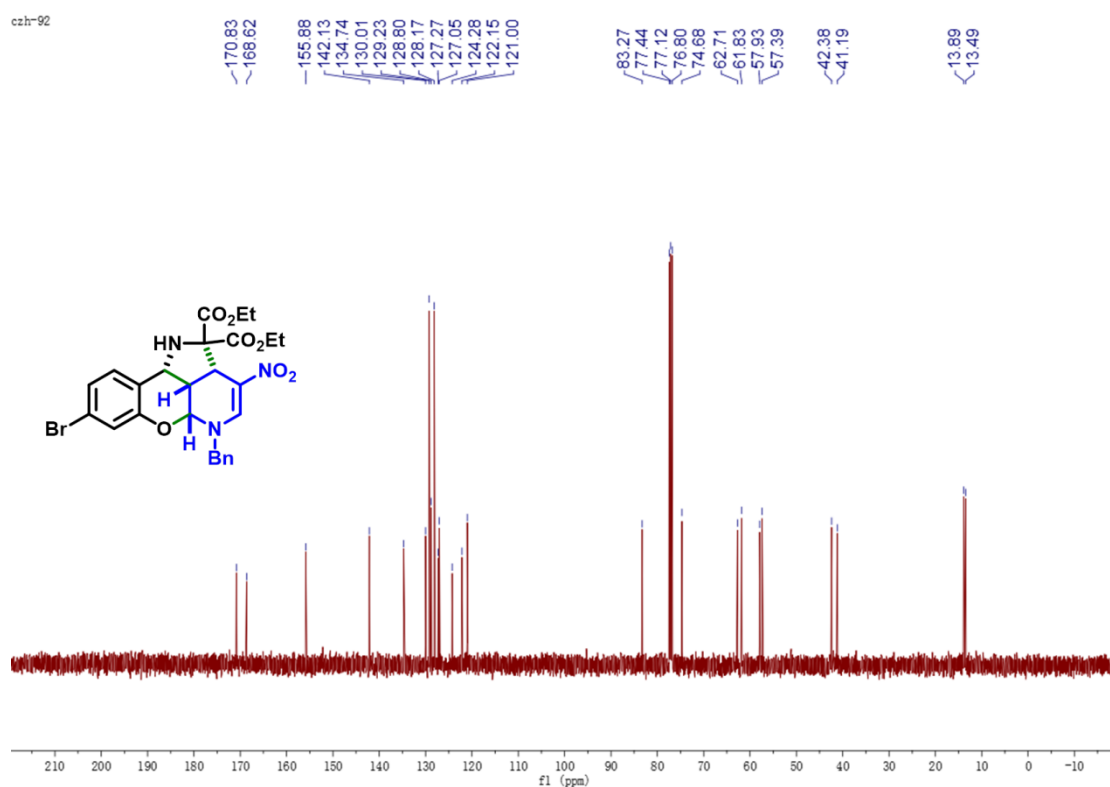

<sup>1</sup>H NMR spectrum of **3h** (400 MHz, CDCl<sub>3</sub>)

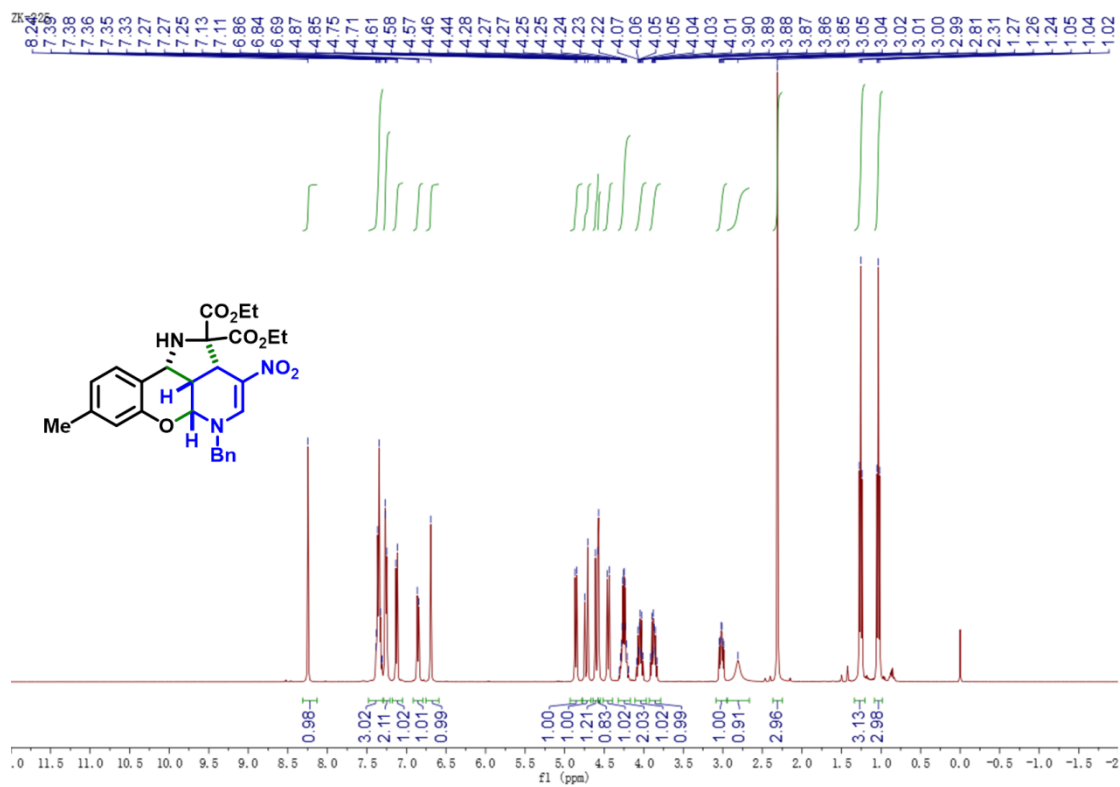

<sup>13</sup>C NMR spectrum of **3h** (100 MHz, CDCl<sub>3</sub>)

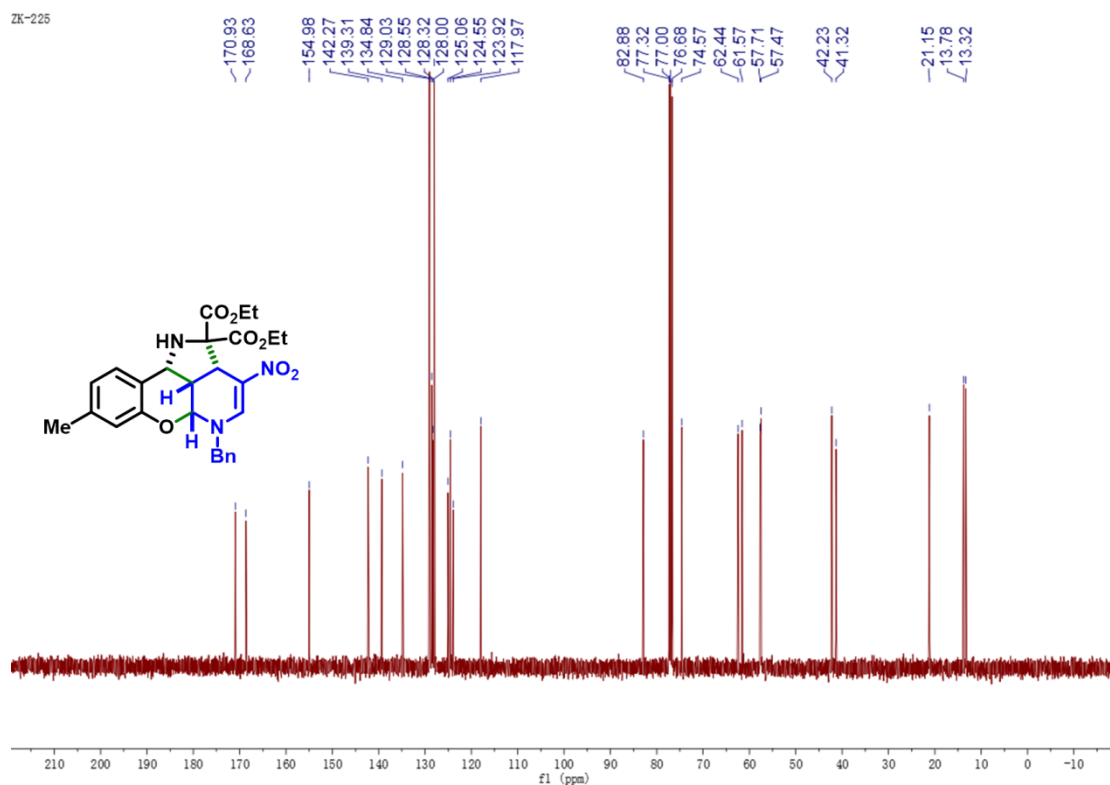

<sup>1</sup>H NMR spectrum of **3i** (400 MHz, CDCl<sub>3</sub>)

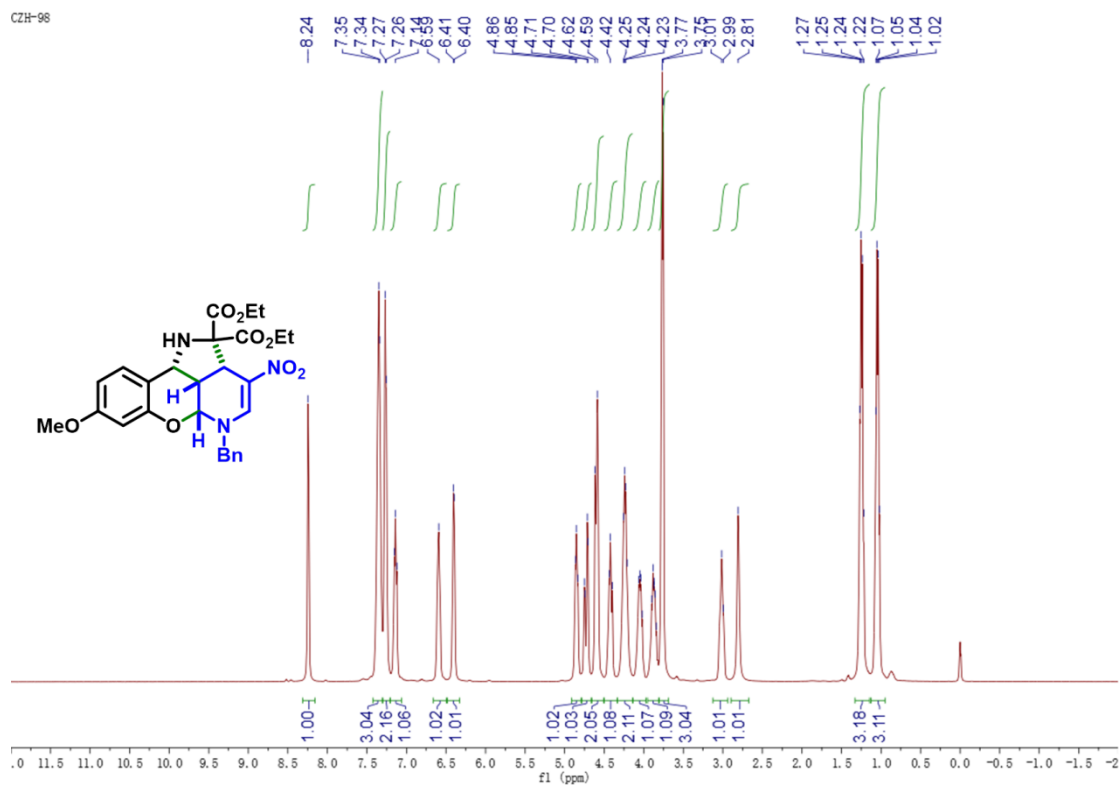

<sup>13</sup>C NMR spectrum of **3i** (100 MHz, CDCl<sub>3</sub>)

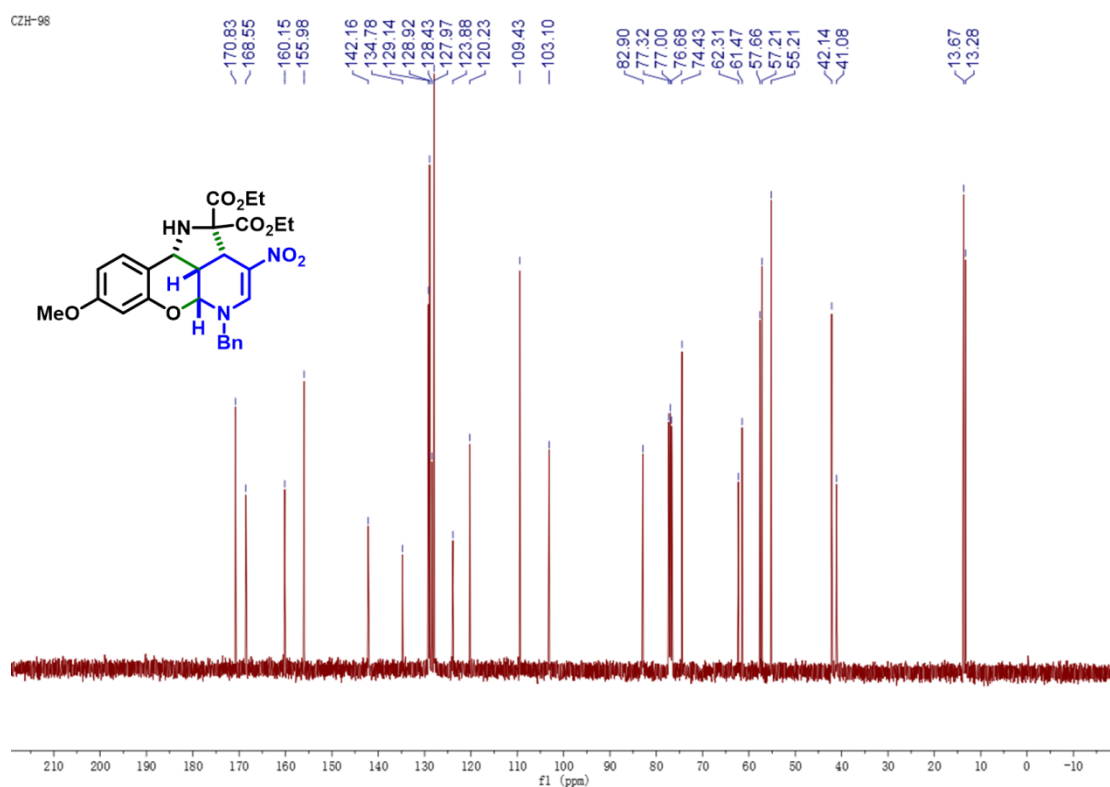

<sup>1</sup>H NMR spectrum of **3j** (400 MHz, CDCl<sub>3</sub>)

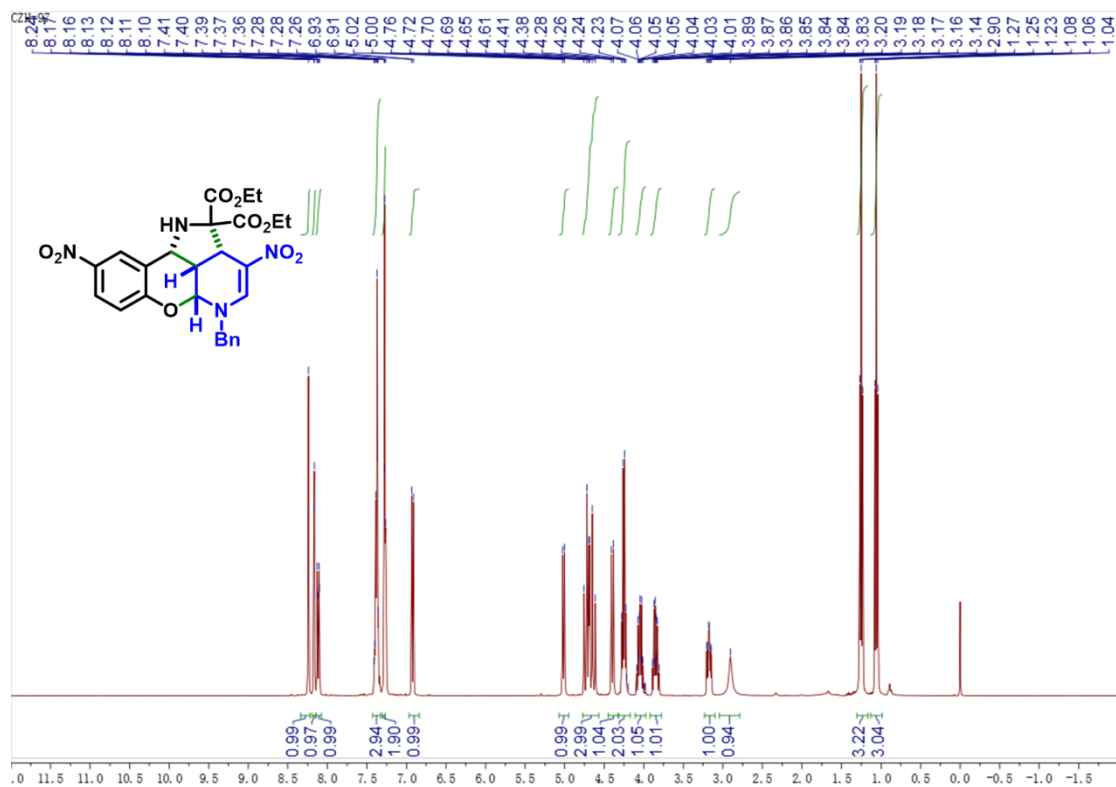

$^{13}\text{C}$  NMR spectrum of **3j** (100 MHz,  $\text{CDCl}_3$ )

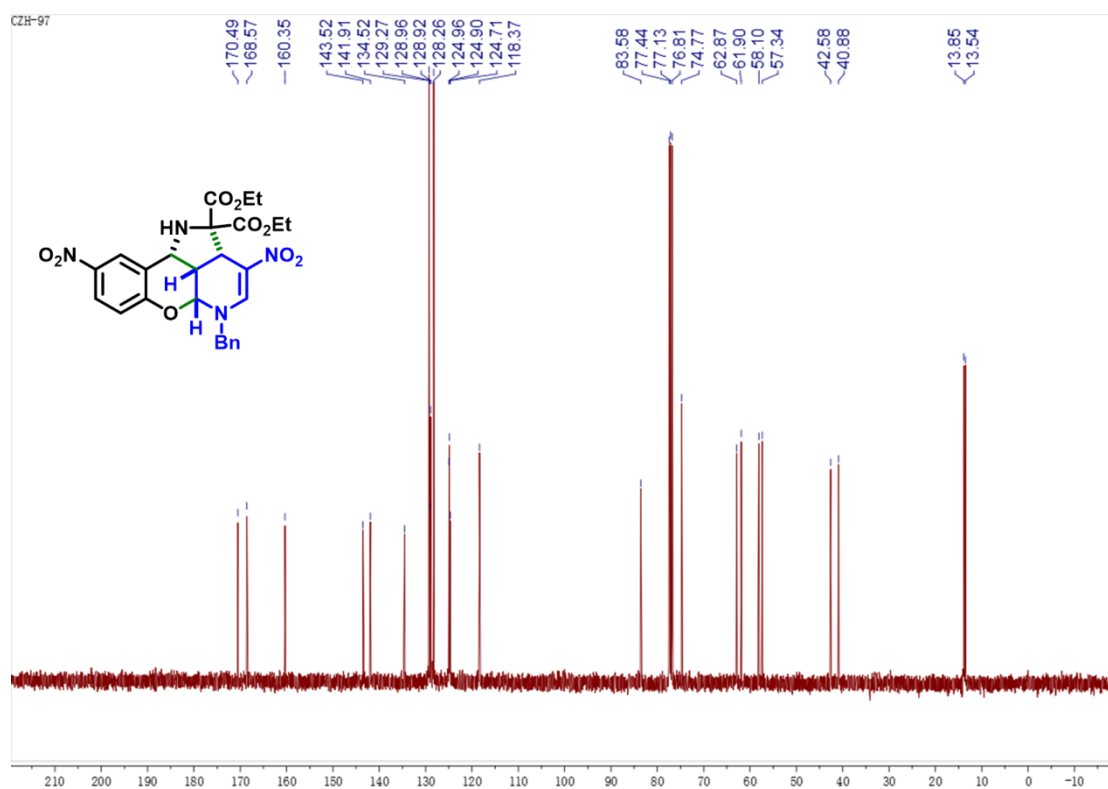

$^1\text{H}$  NMR spectrum of **3k** (400 MHz,  $\text{CDCl}_3$ )

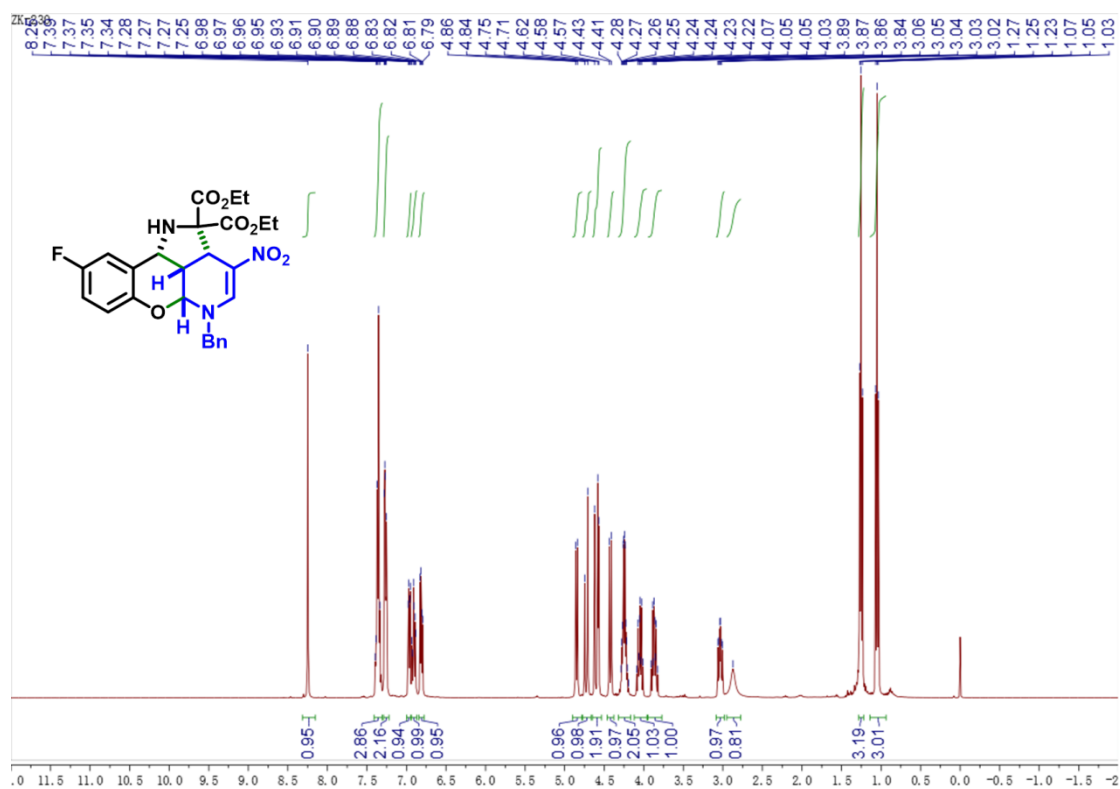



$^{13}\text{C}$  NMR spectrum of **3k** (100 MHz,  $\text{CDCl}_3$ )

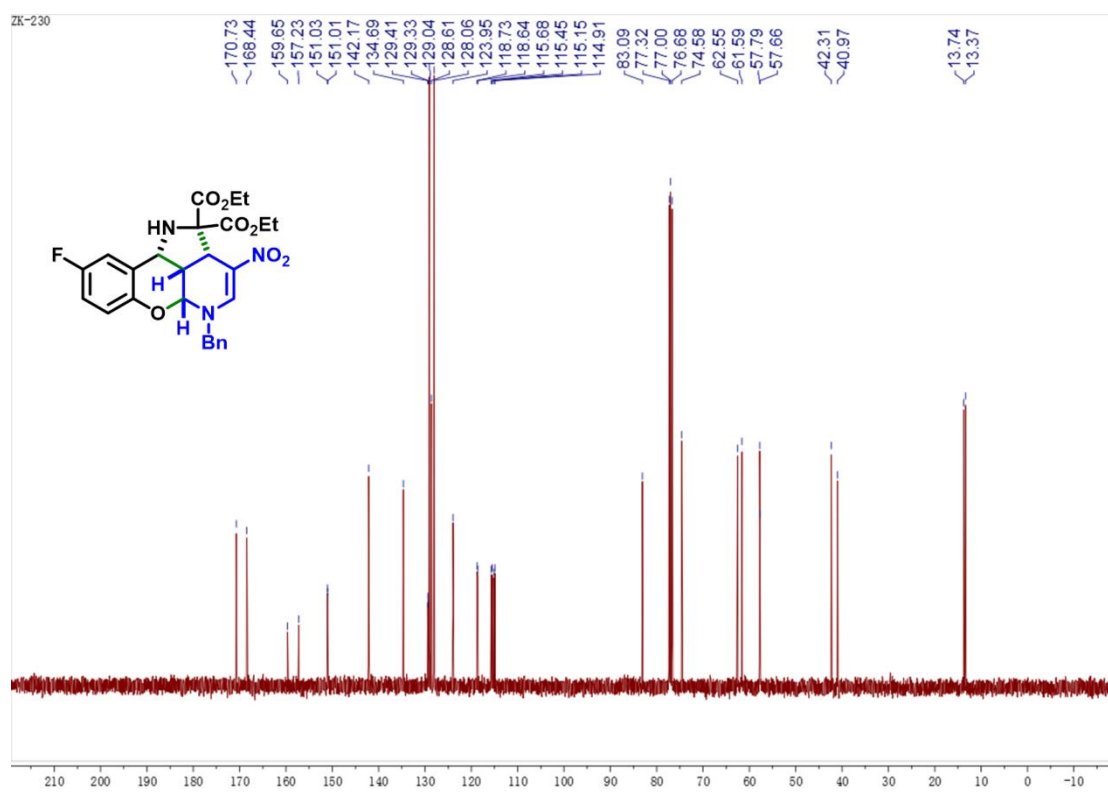

$^{19}\text{F}$  NMR spectrum of **3k** (375 MHz,  $\text{CDCl}_3$ )

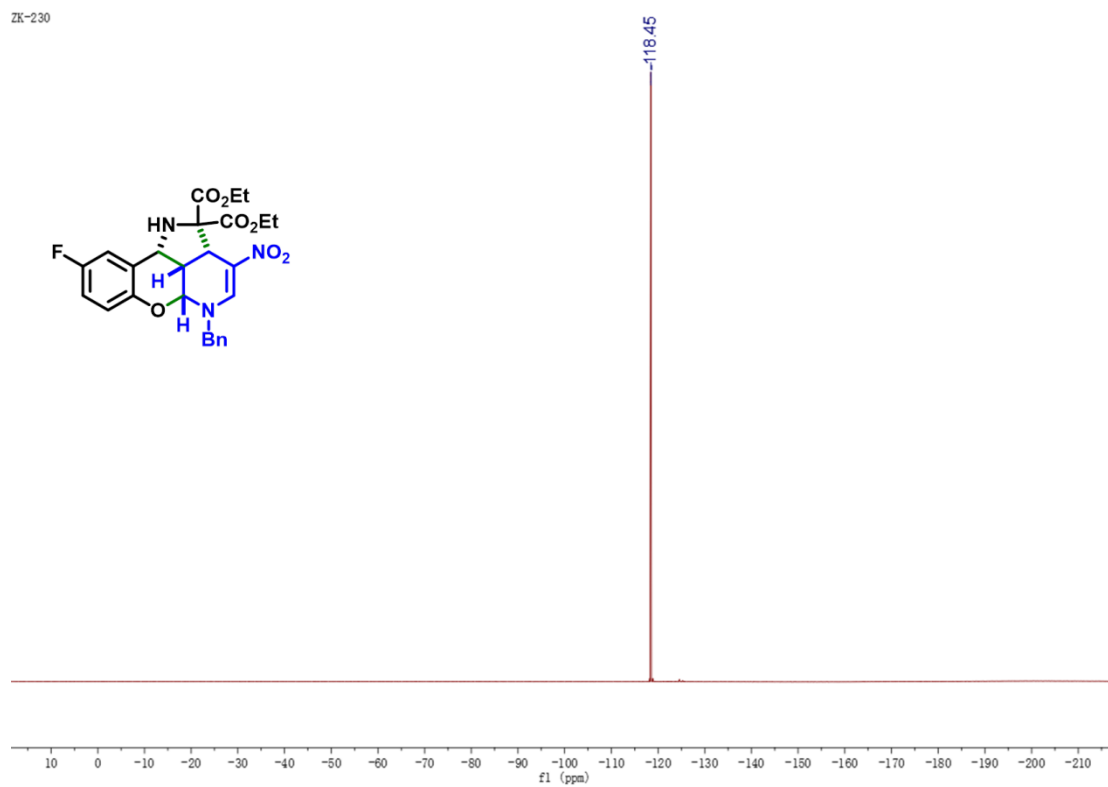

<sup>1</sup>H NMR spectrum of **3I** (400 MHz, CDCl<sub>3</sub>)

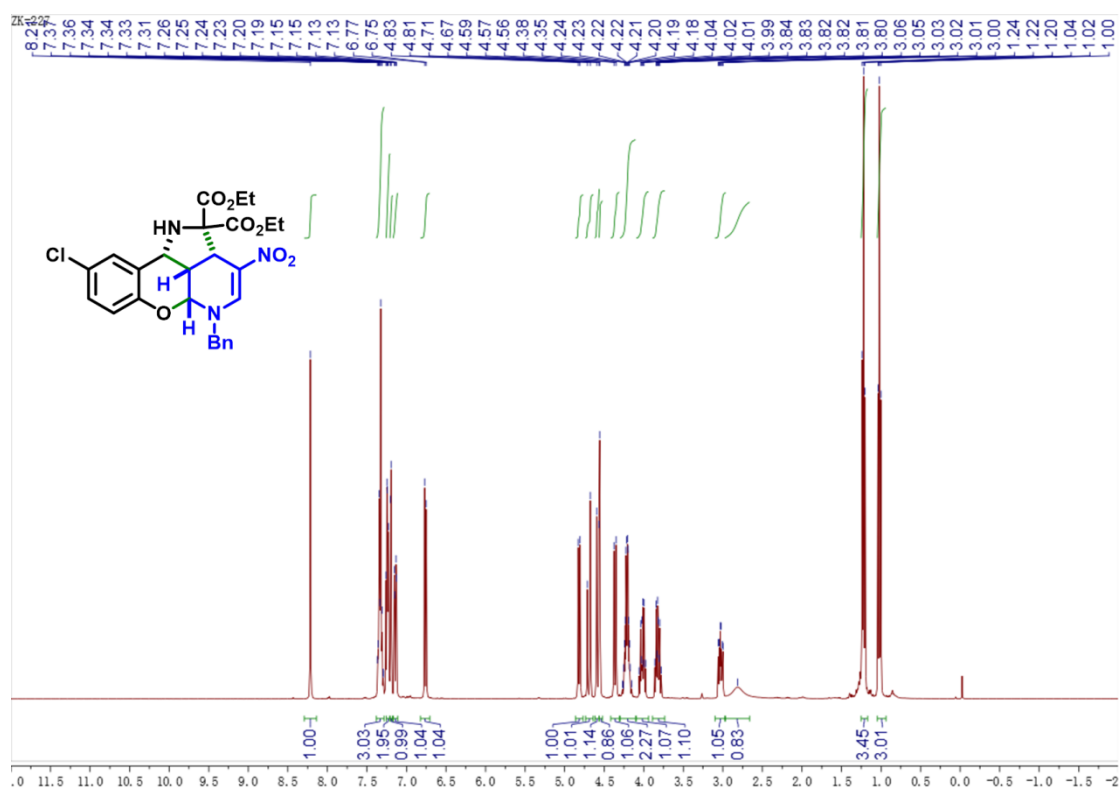

<sup>13</sup>C NMR spectrum of **3I** (100 MHz, CDCl<sub>3</sub>)

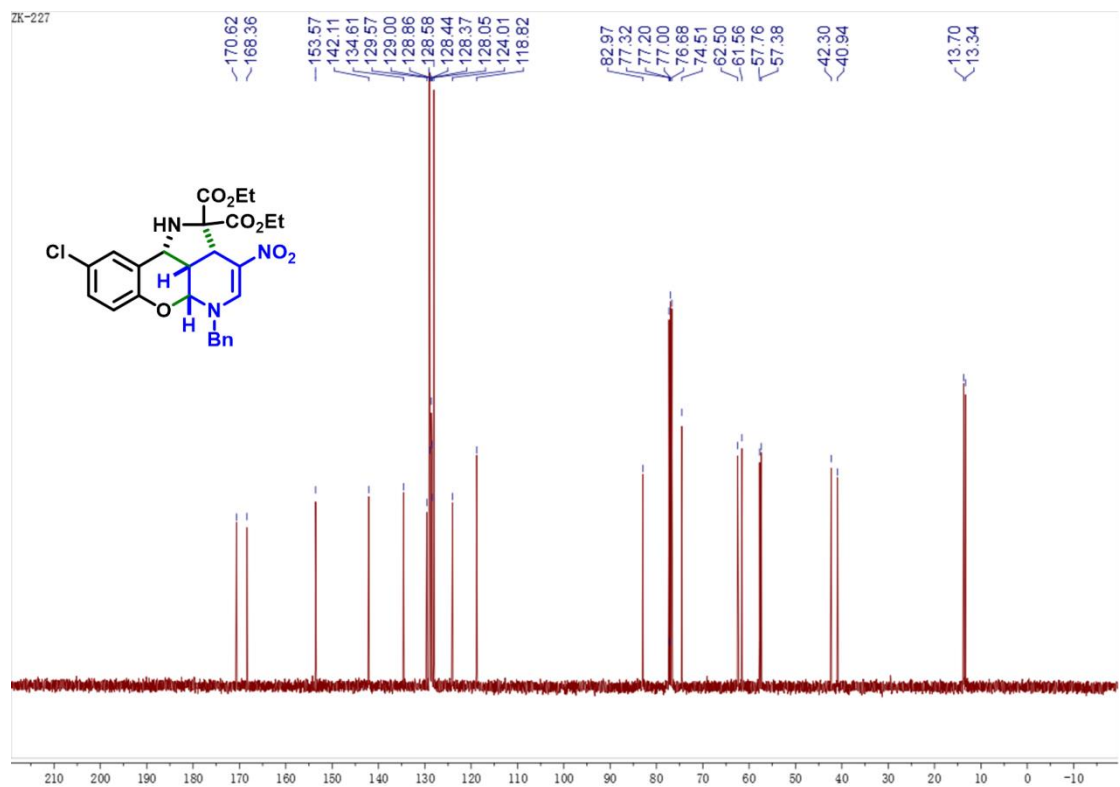

<sup>1</sup>H NMR spectrum of **3m** (400 MHz, CDCl<sub>3</sub>)

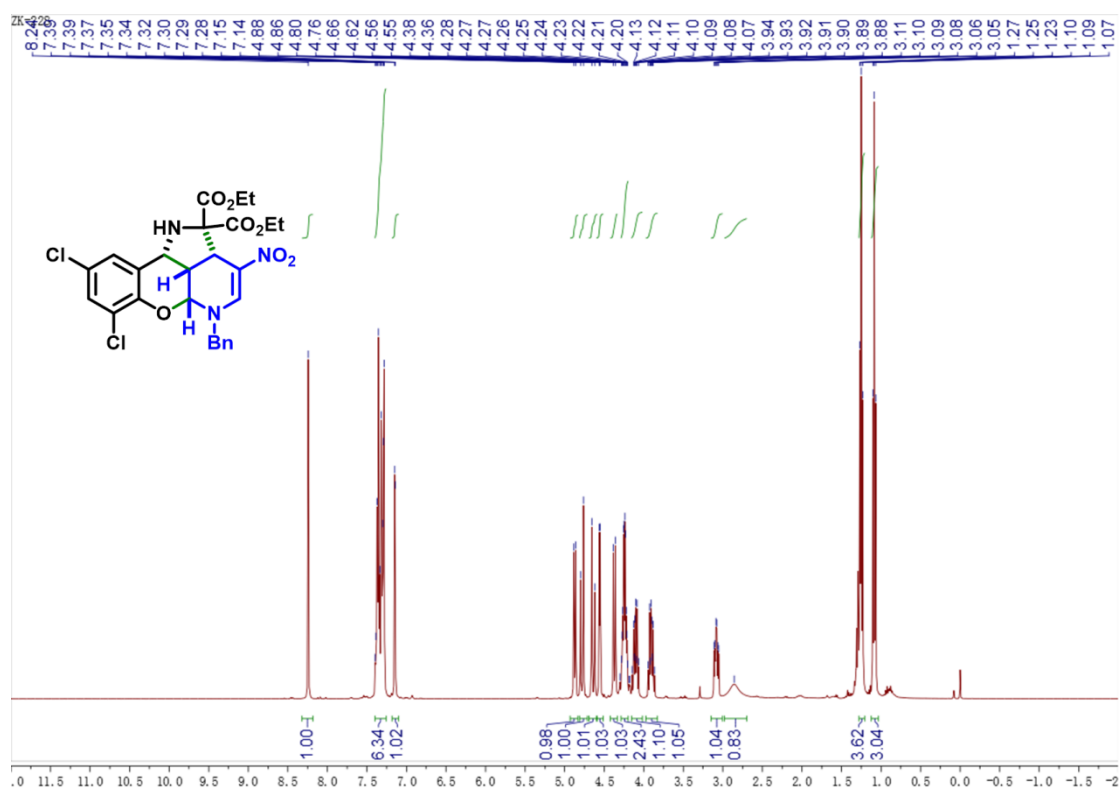

<sup>13</sup>C NMR spectrum of **3m** (100 MHz, CDCl<sub>3</sub>)

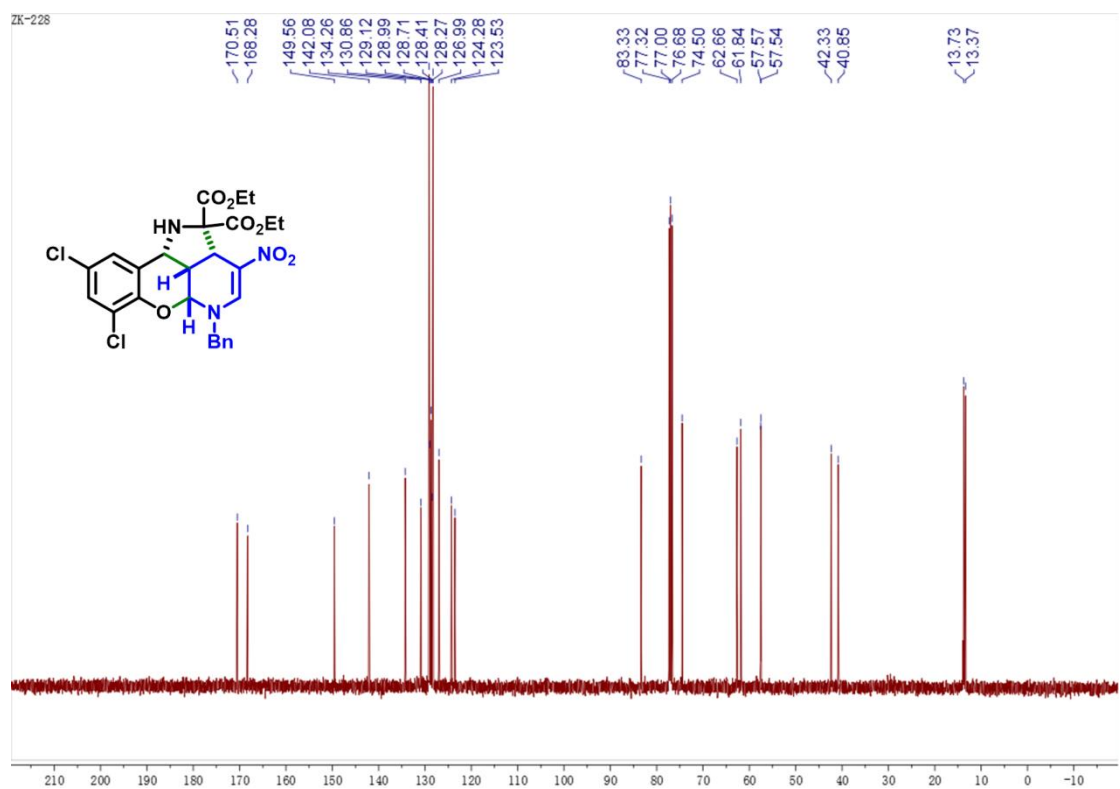

<sup>1</sup>H NMR spectrum of **3n** (400 MHz, CDCl<sub>3</sub>)

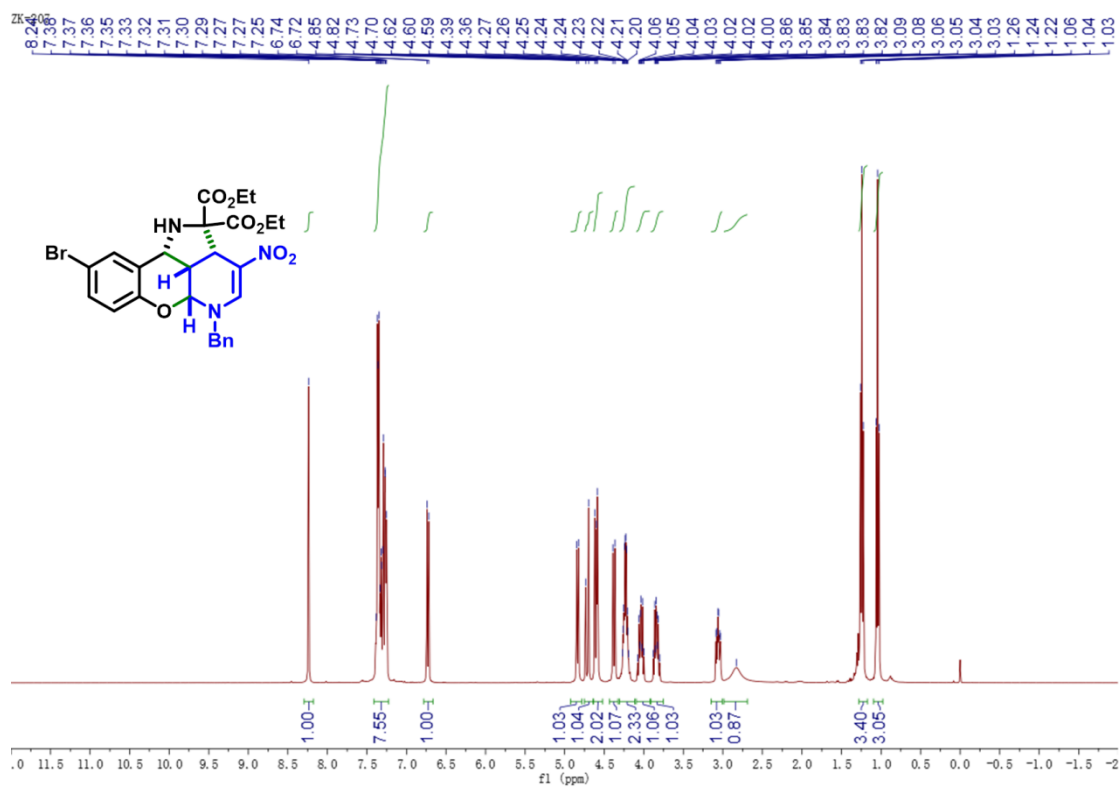

<sup>13</sup>C NMR spectrum of **3n** (100 MHz, CDCl<sub>3</sub>)

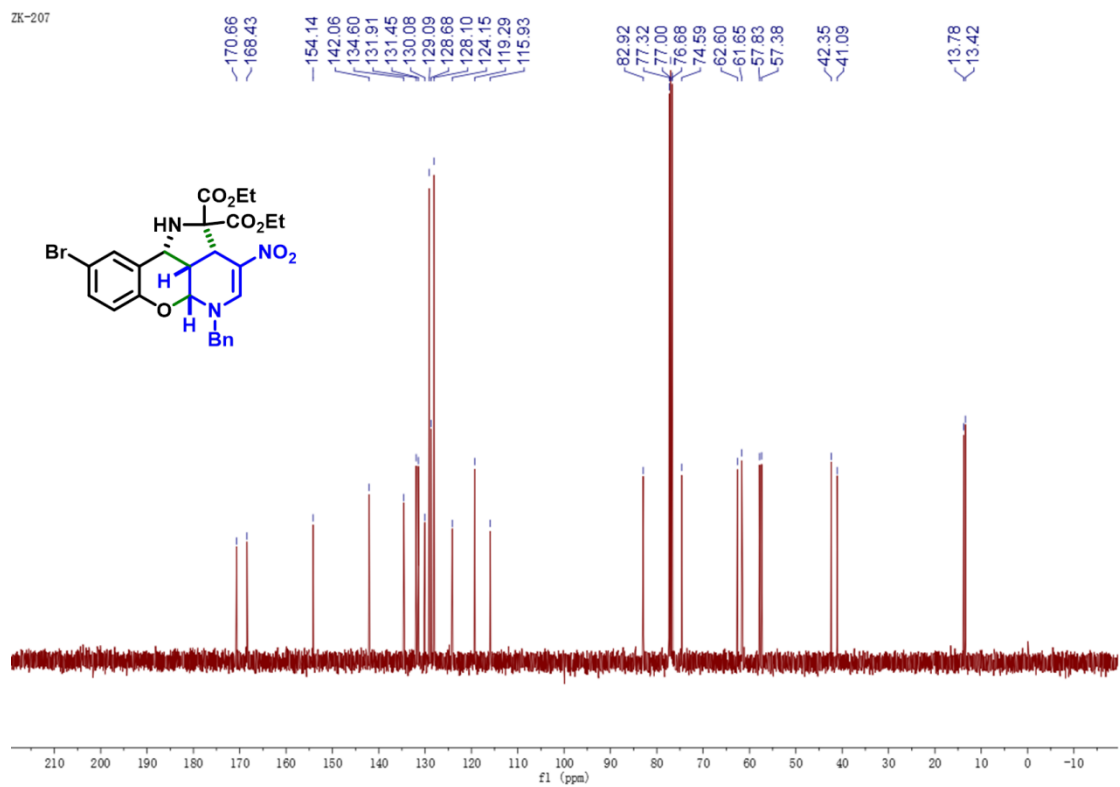

<sup>1</sup>H NMR spectrum of **3o** (400 MHz, CDCl<sub>3</sub>)

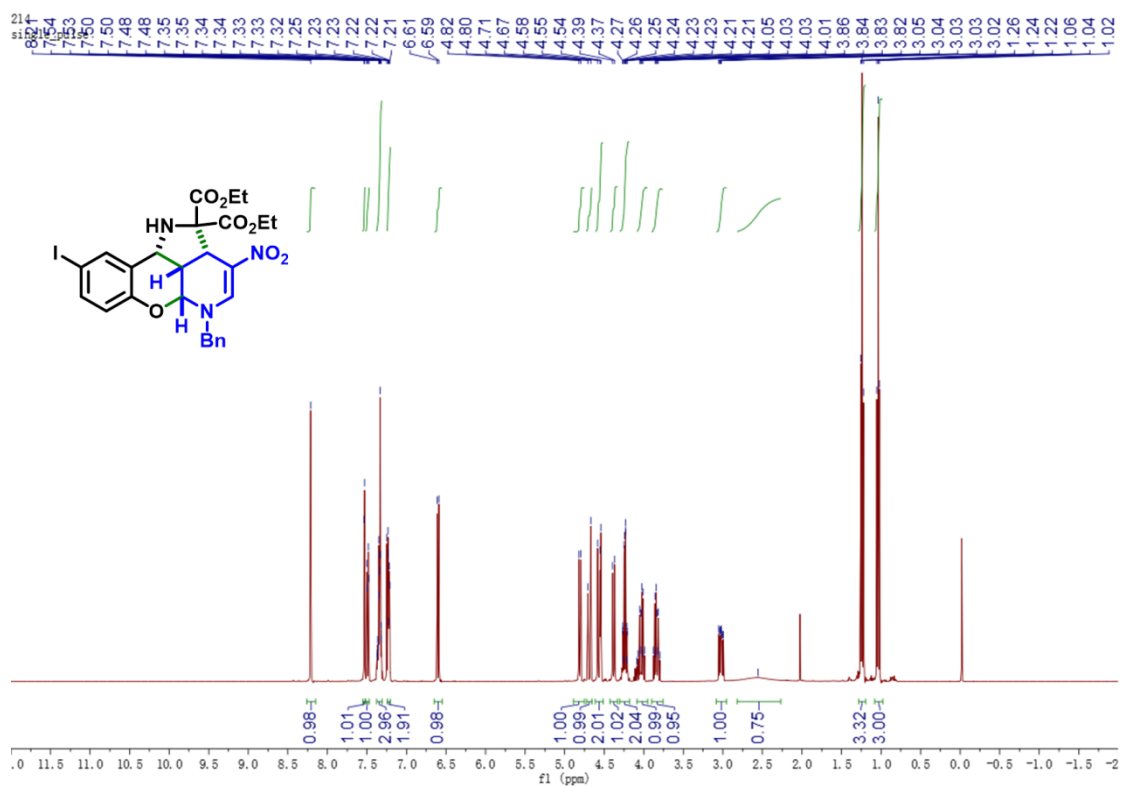

<sup>13</sup>C NMR spectrum of **3o** (100 MHz, CDCl<sub>3</sub>)

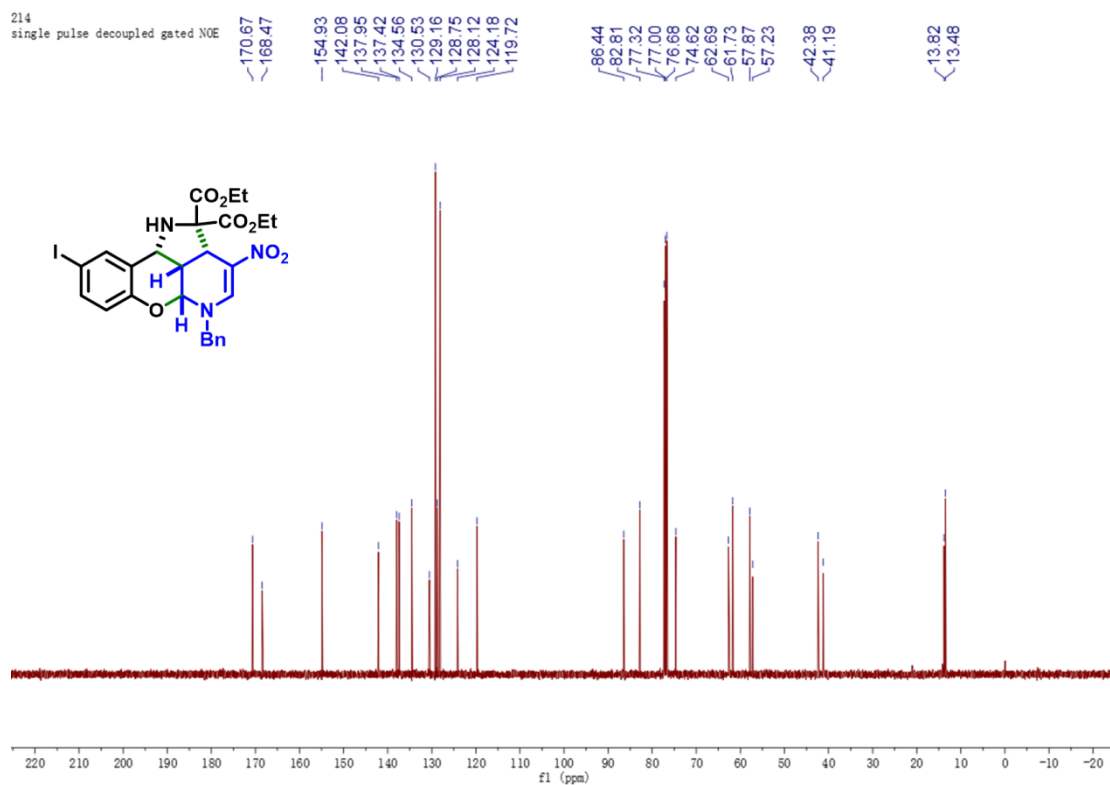

<sup>1</sup>H NMR spectrum of **3p** (400 MHz, CDCl<sub>3</sub>)

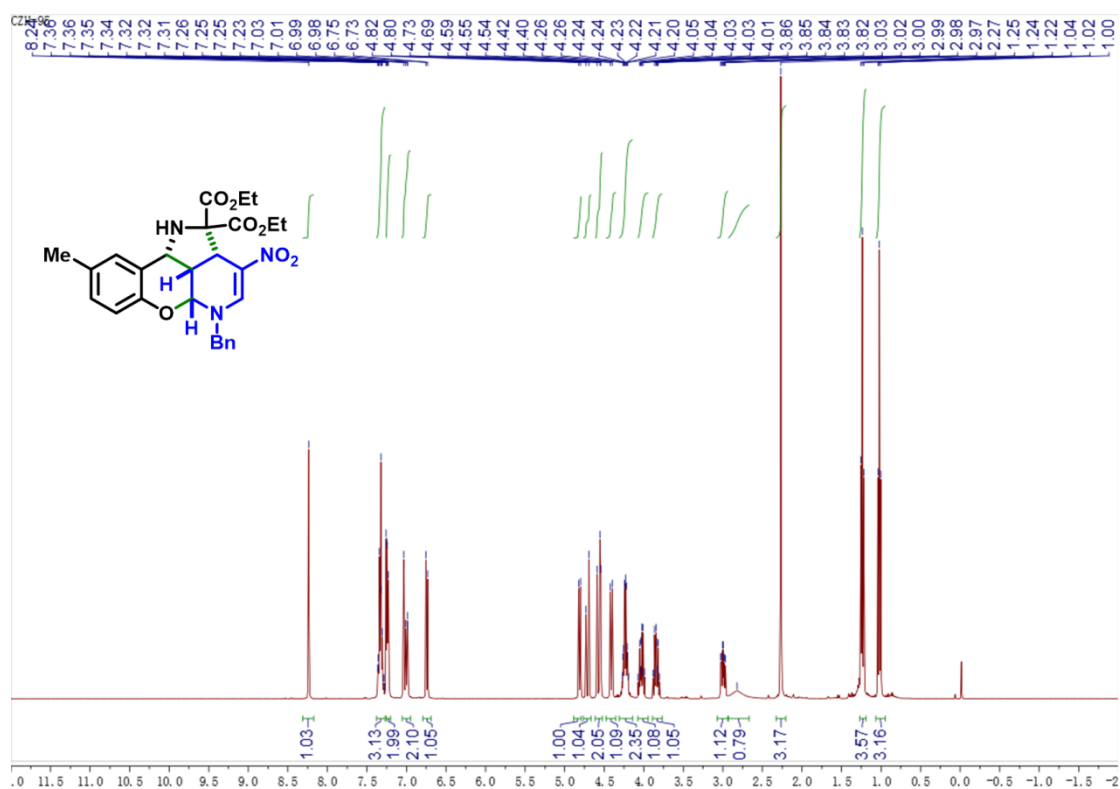

<sup>13</sup>C NMR spectrum of **3p** (100 MHz, CDCl<sub>3</sub>)

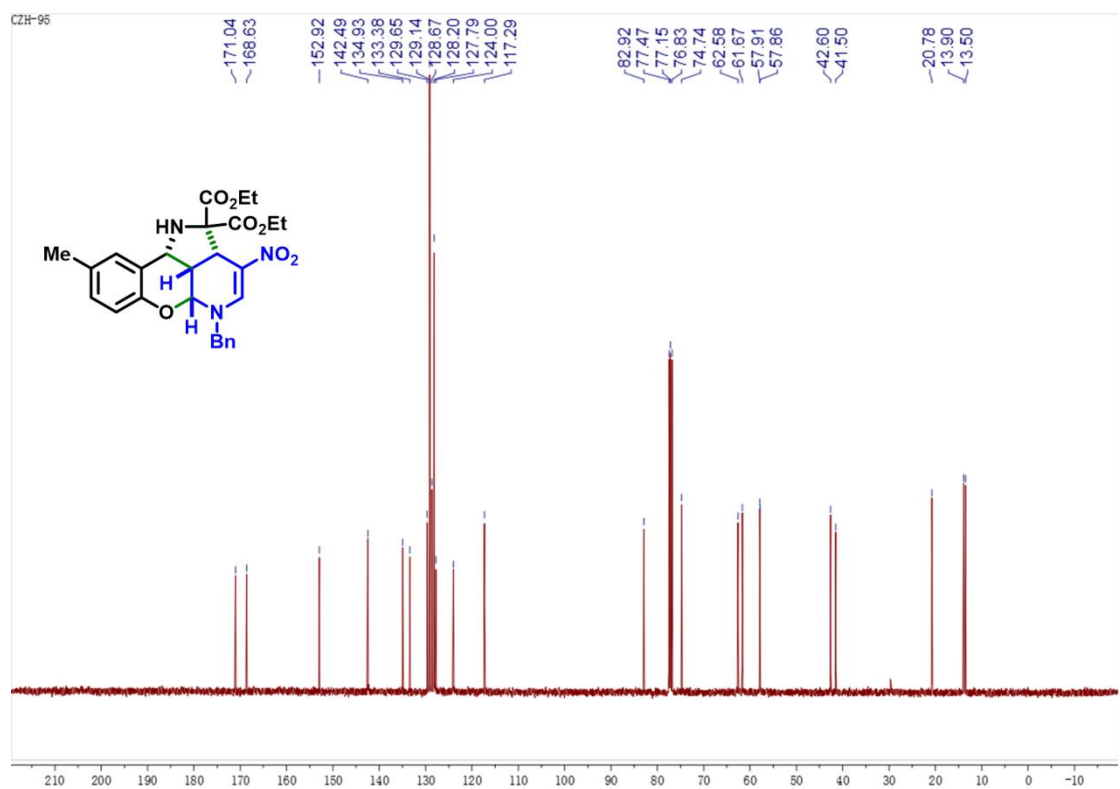

<sup>1</sup>H NMR spectrum of **3q** (400 MHz, CDCl<sub>3</sub>)

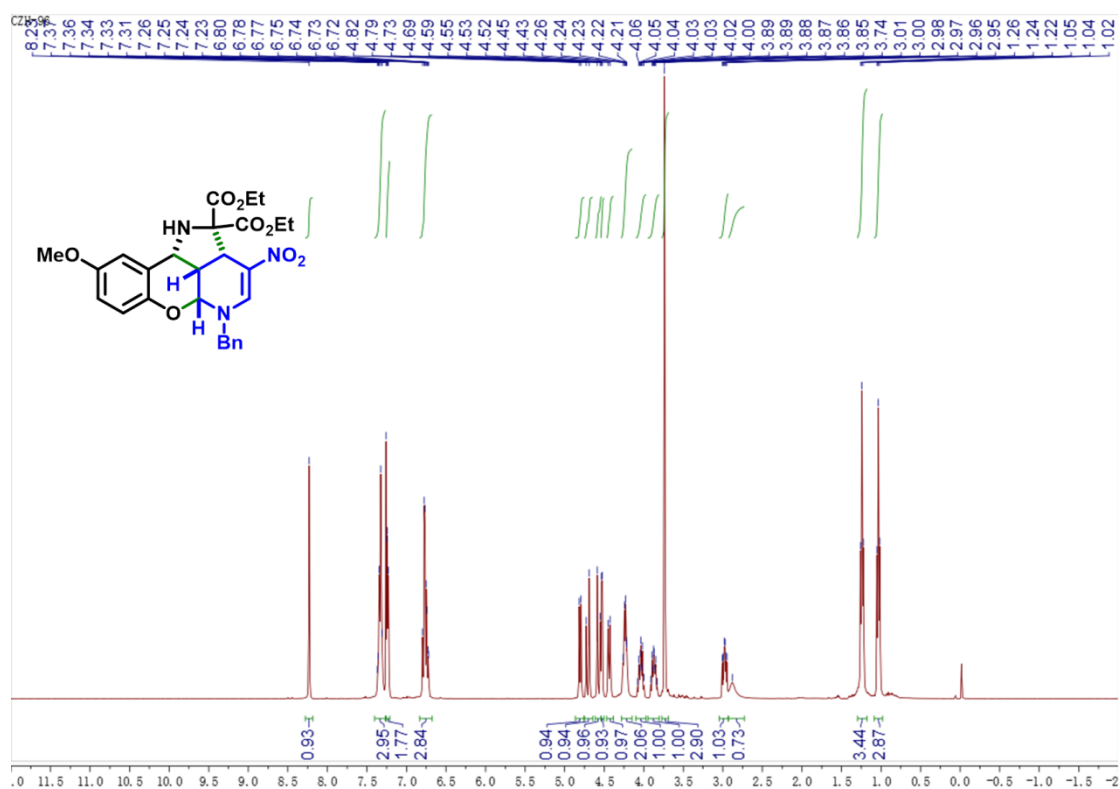

<sup>13</sup>C NMR spectrum of **3q** (100 MHz, CDCl<sub>3</sub>)

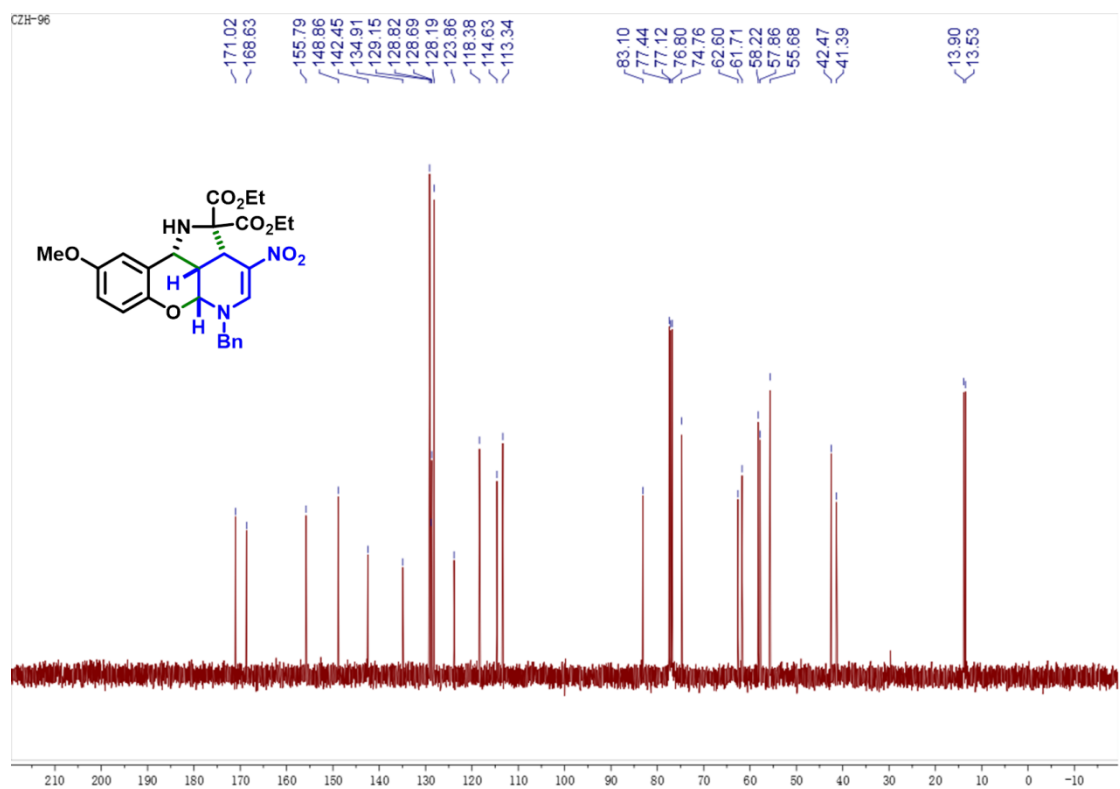

<sup>1</sup>H NMR spectrum of **3r** (400 MHz, CDCl<sub>3</sub>)

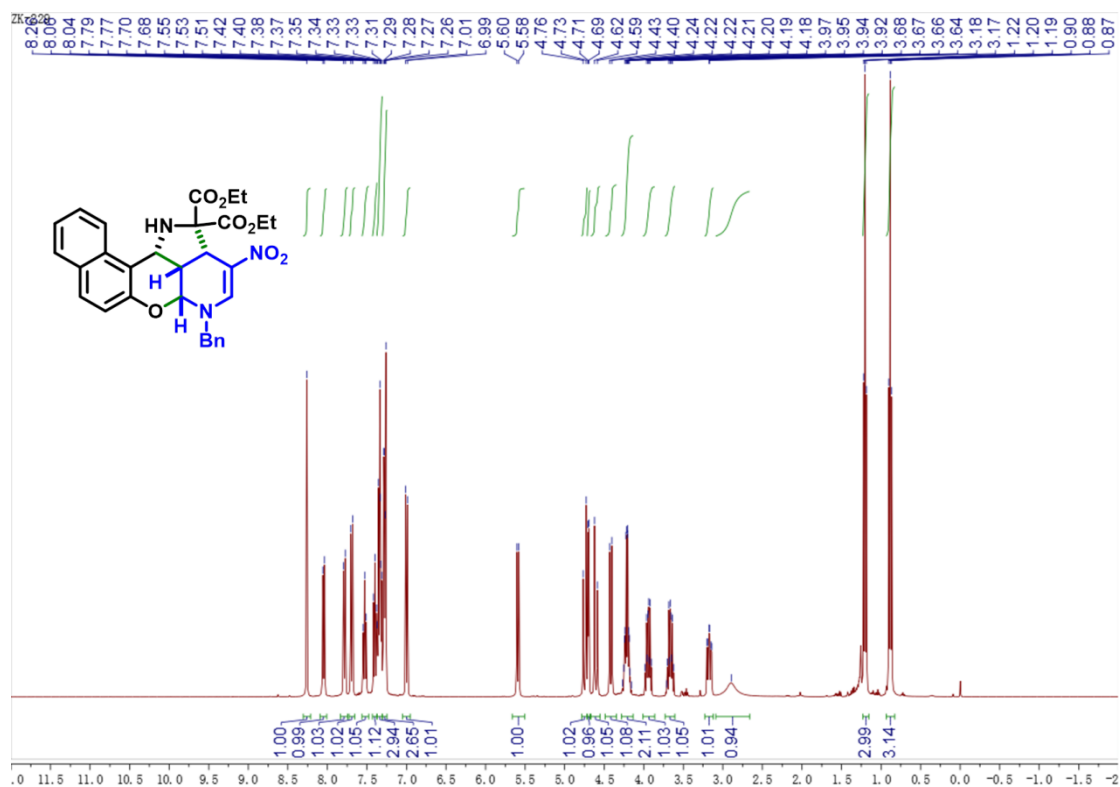

<sup>13</sup>C NMR spectrum of **3r** (100 MHz, CDCl<sub>3</sub>)

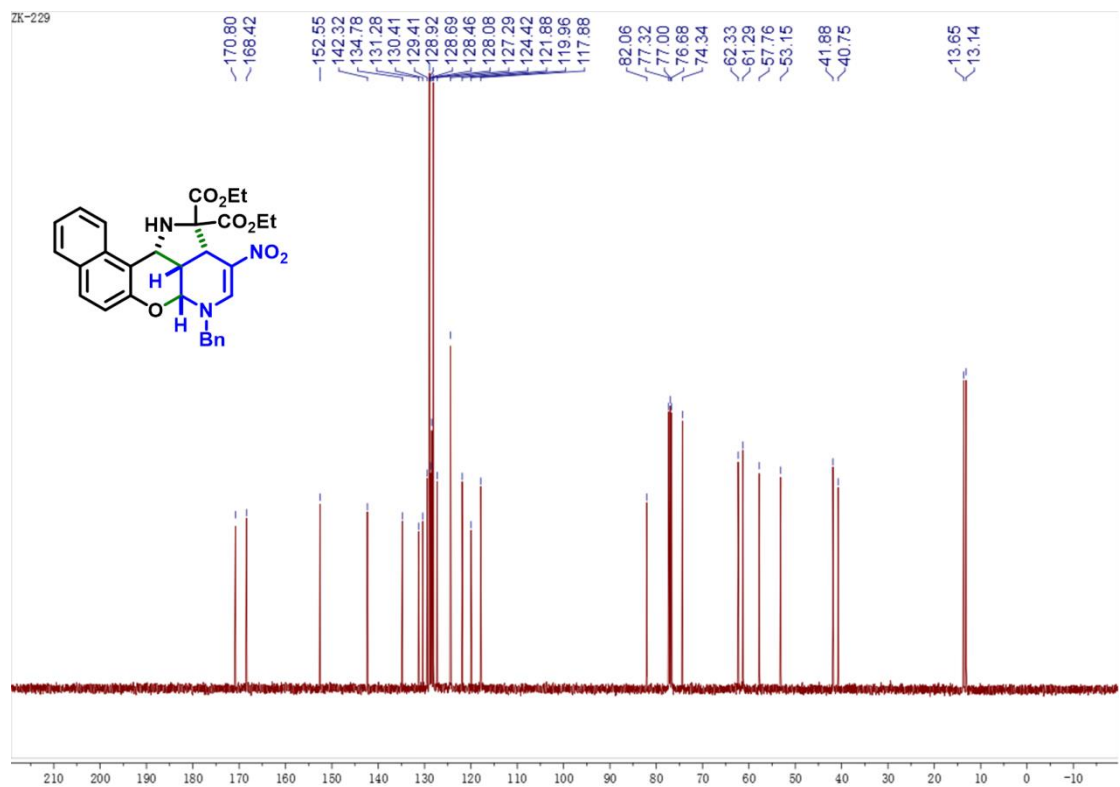



<sup>1</sup>H NMR spectrum of **3s** (400 MHz, CDCl<sub>3</sub>)

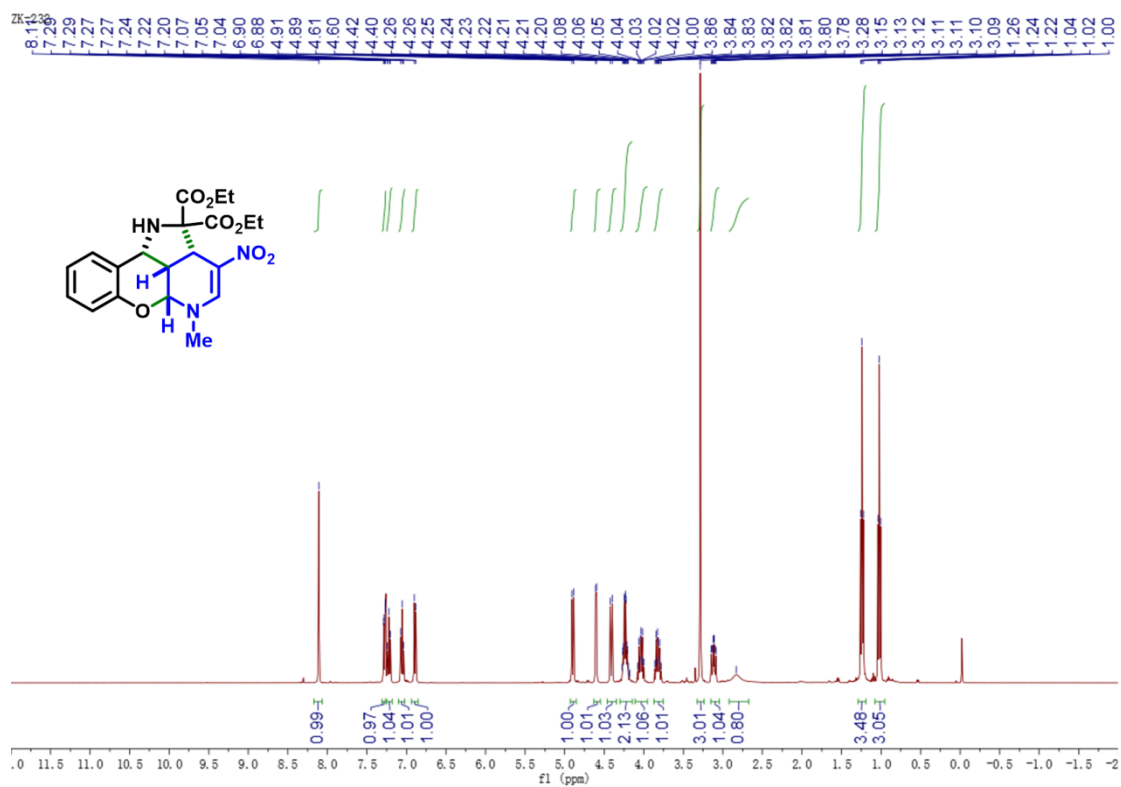

<sup>13</sup>C NMR spectrum of **3s** (100 MHz, CDCl<sub>3</sub>)

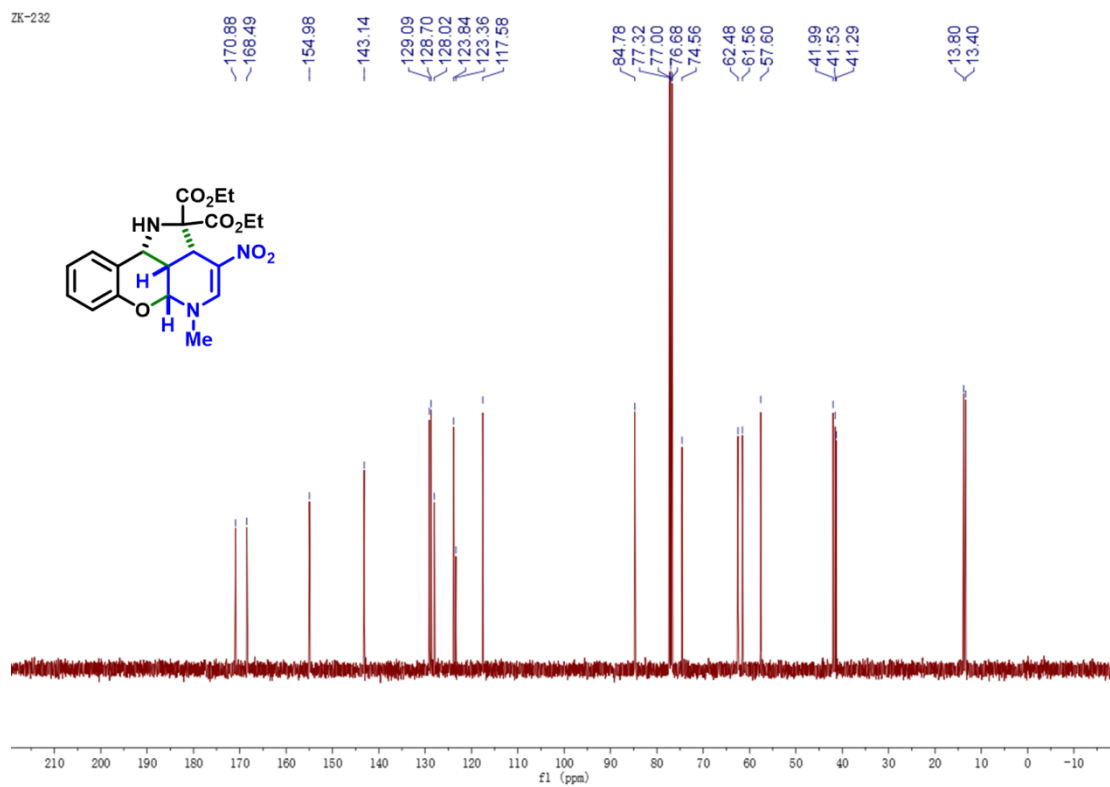

<sup>1</sup>H NMR spectrum of **3t** (400 MHz, CDCl<sub>3</sub>)

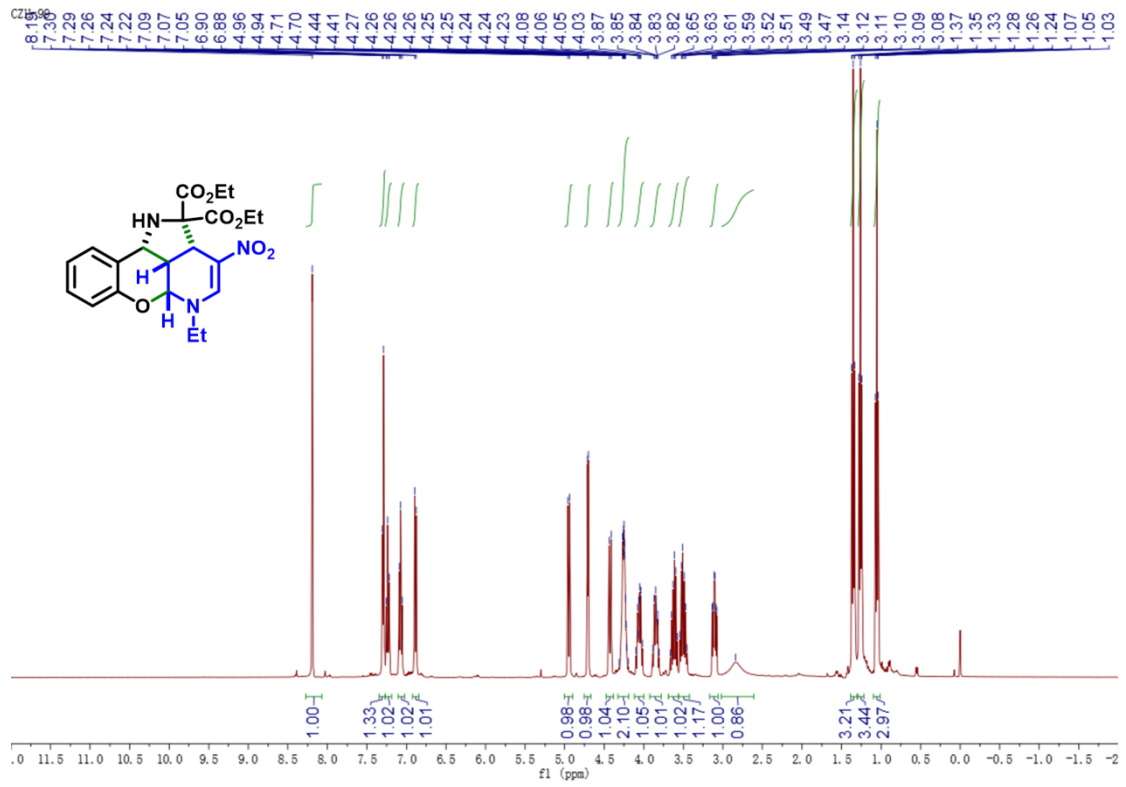

<sup>13</sup>C NMR spectrum of **3t** (100 MHz, CDCl<sub>3</sub>)

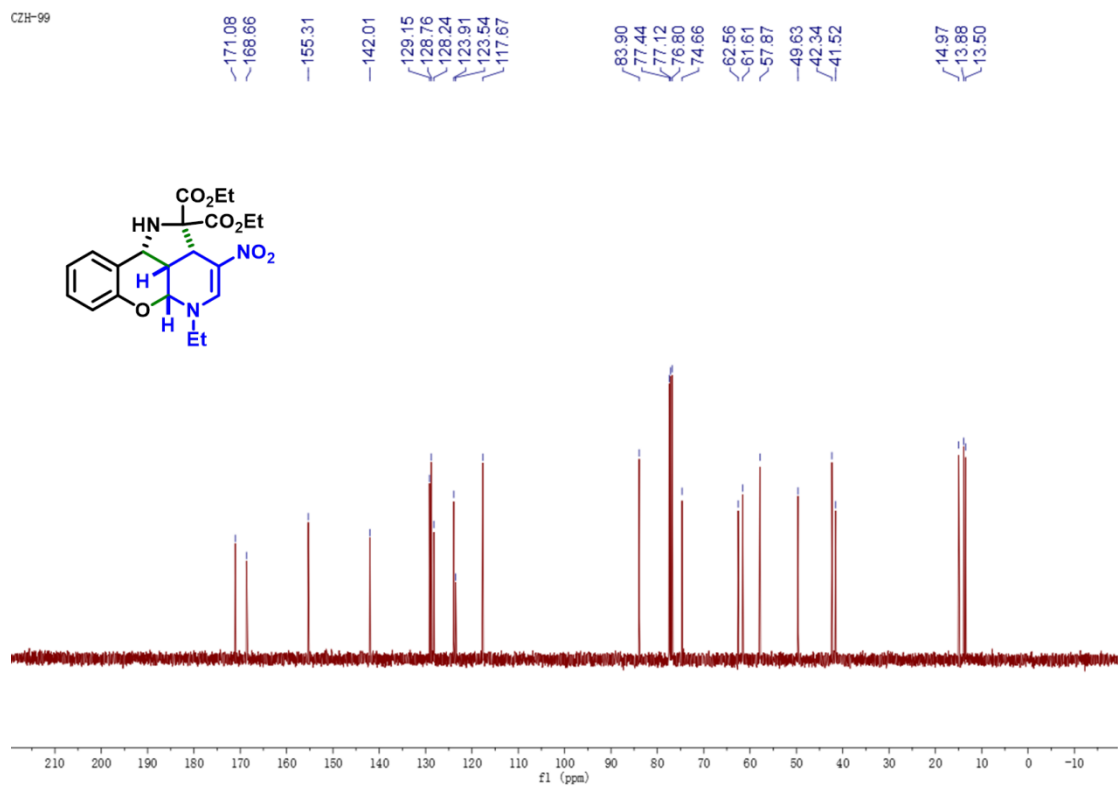

<sup>1</sup>H NMR spectrum of **3u** (300 MHz, CDCl<sub>3</sub>)

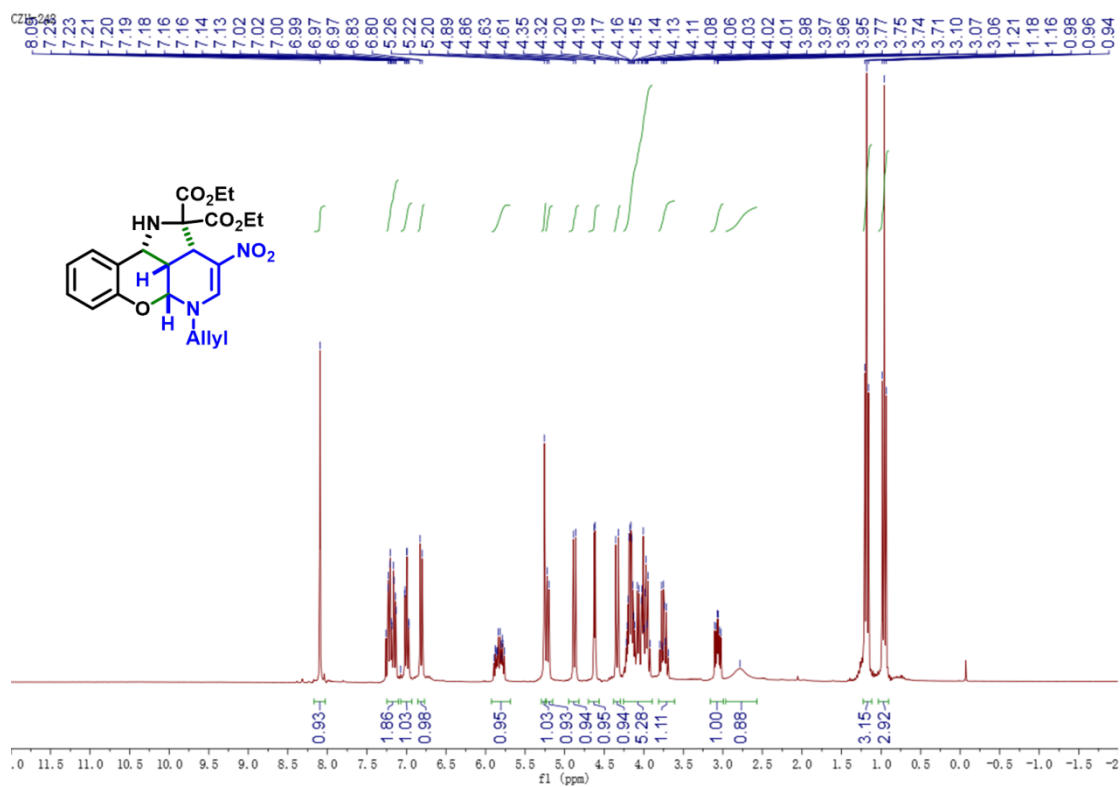

<sup>13</sup>C NMR spectrum of **3u** (75 MHz, CDCl<sub>3</sub>)

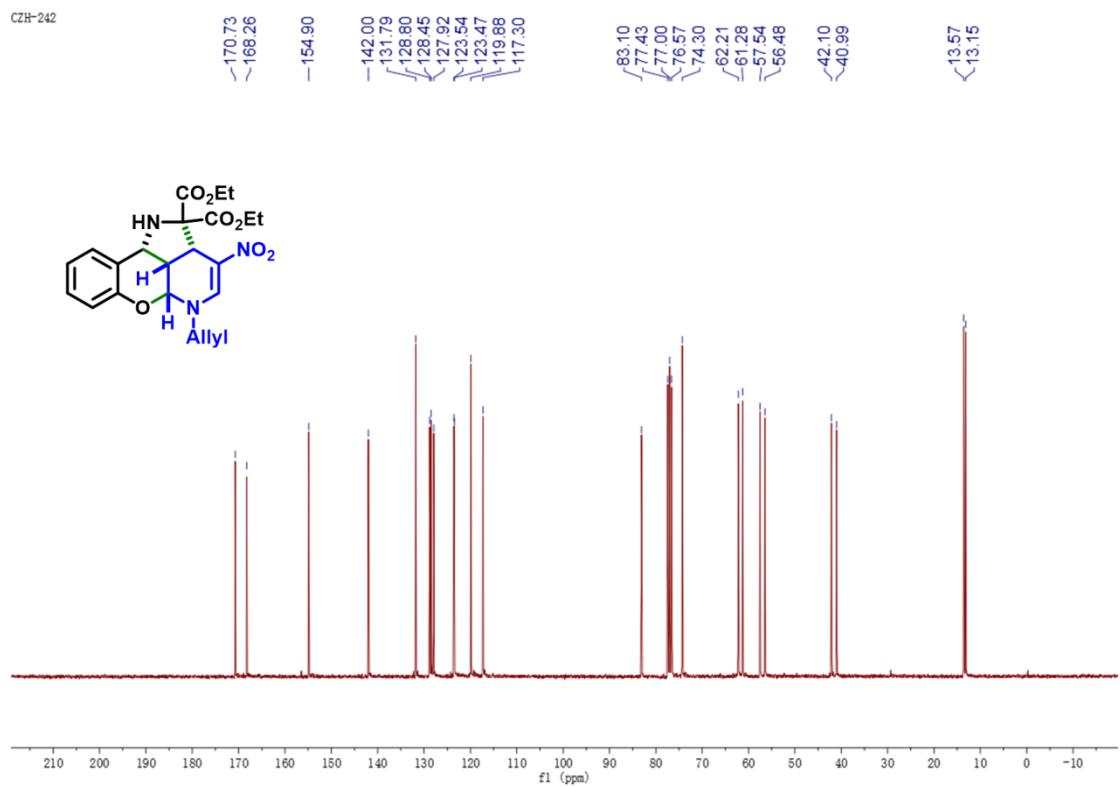

<sup>1</sup>H NMR spectrum of **3v** (300 MHz, CDCl<sub>3</sub>)

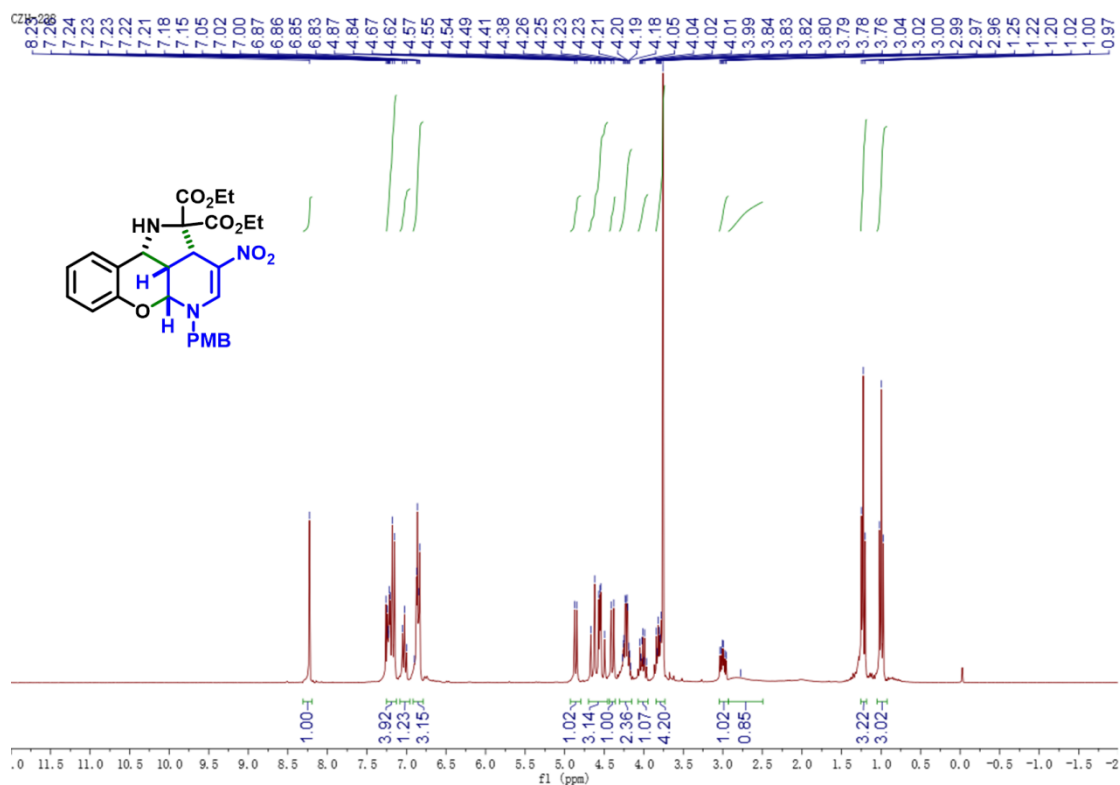

<sup>13</sup>C NMR spectrum of **3v** (75 MHz, CDCl<sub>3</sub>)

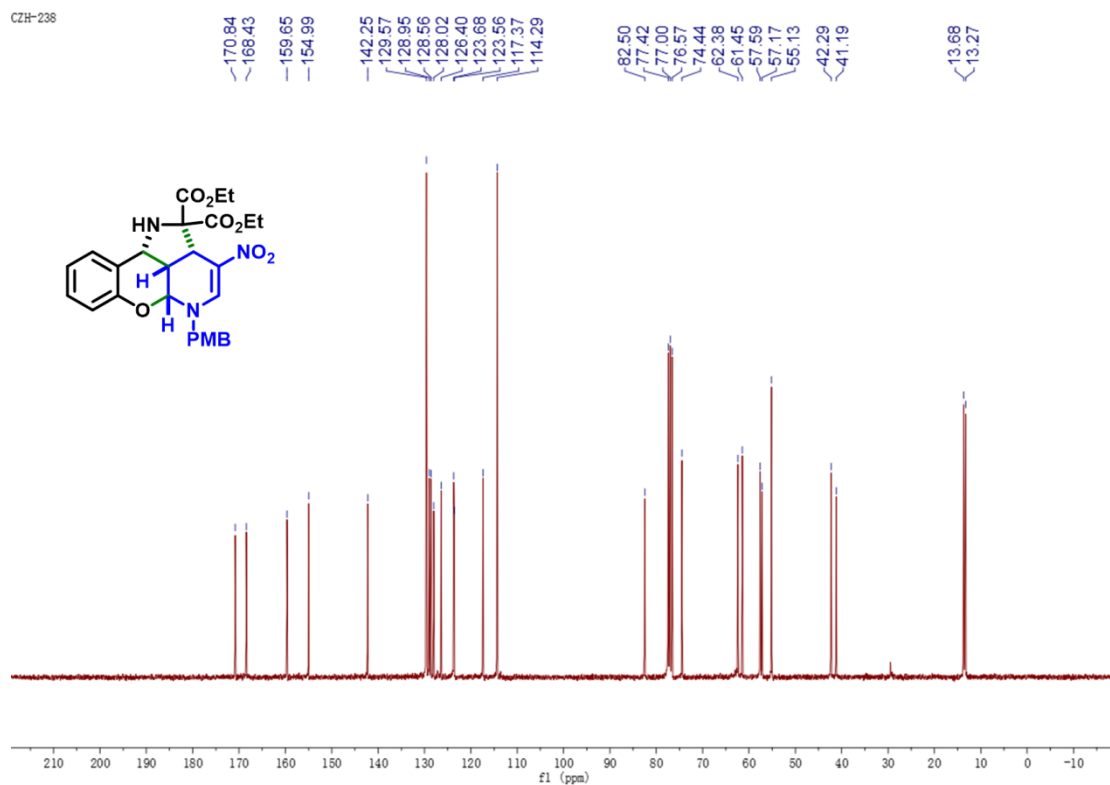

<sup>1</sup>H NMR spectrum of **3w** (300 MHz, CDCl<sub>3</sub>)

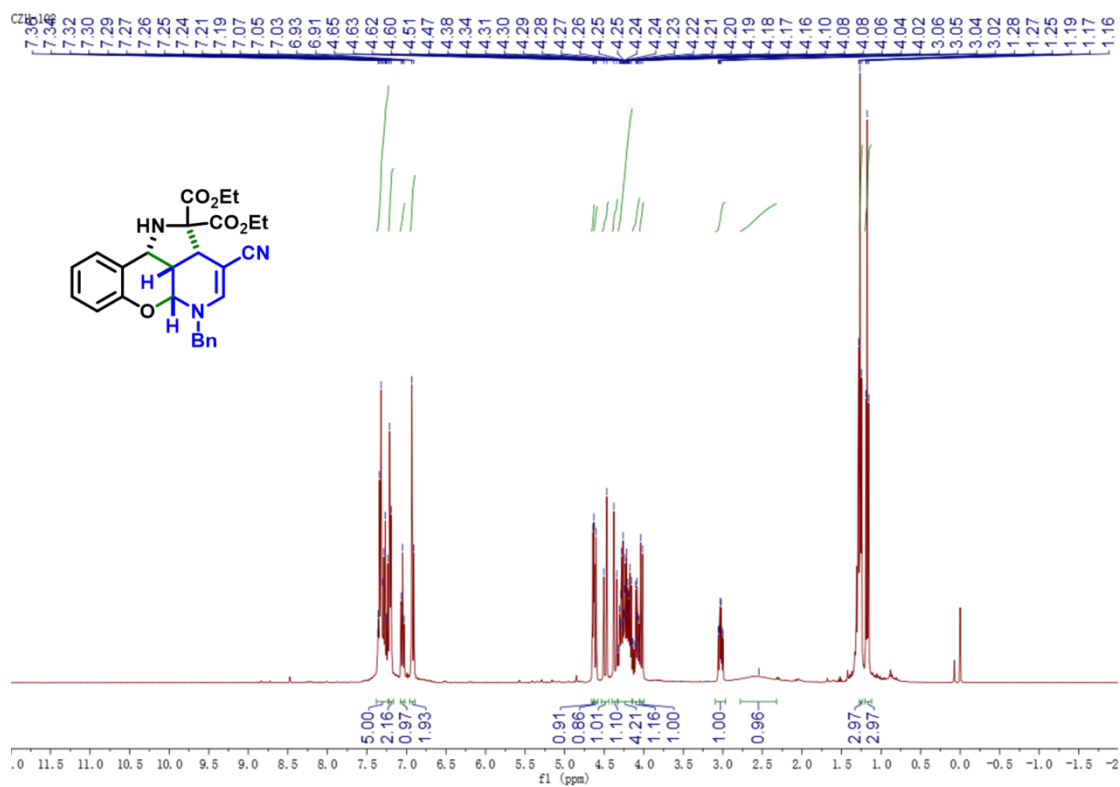

<sup>13</sup>C NMR spectrum of **3w** (75 MHz, CDCl<sub>3</sub>)

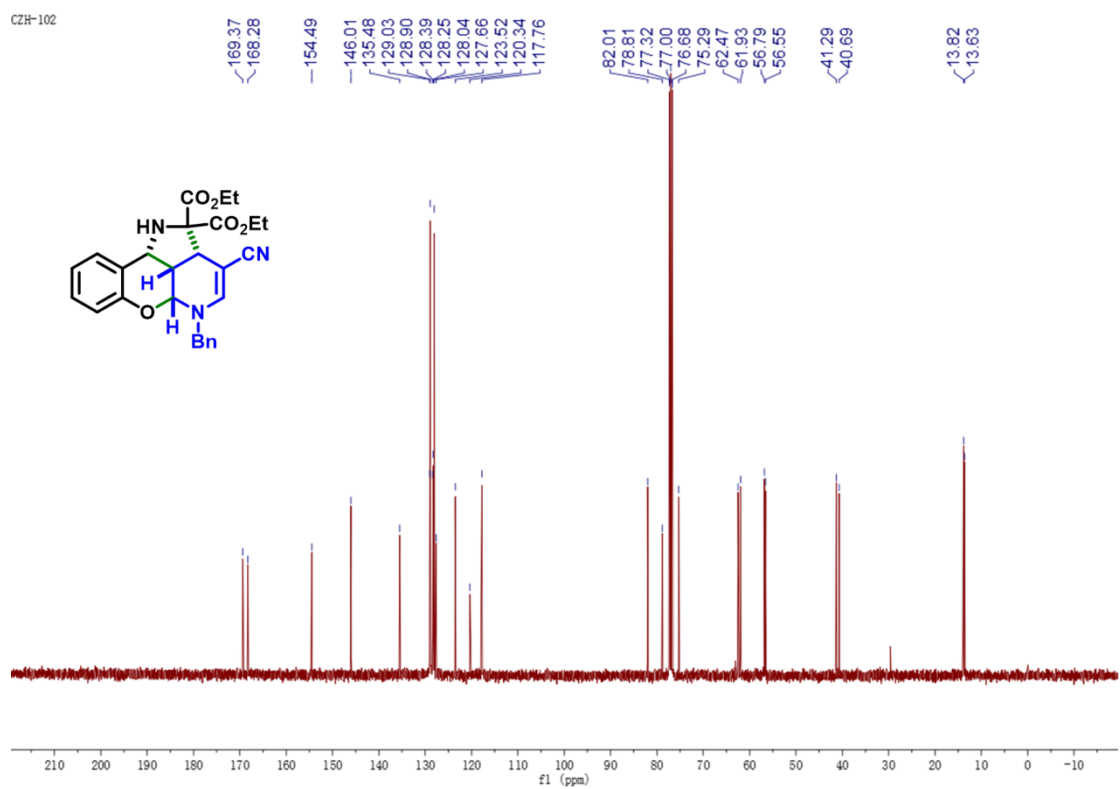

<sup>1</sup>H NMR spectrum of **3x** (300 MHz, CDCl<sub>3</sub>)

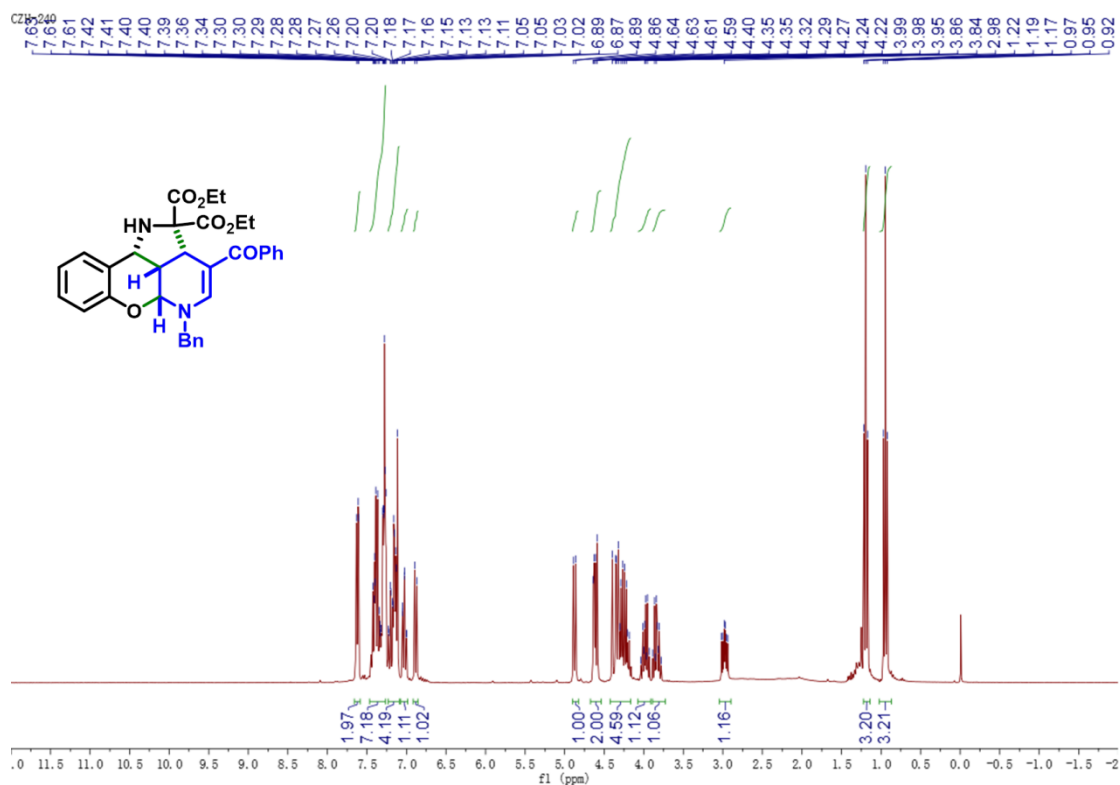

<sup>13</sup>C NMR spectrum of **3x** (75 MHz, CDCl<sub>3</sub>)

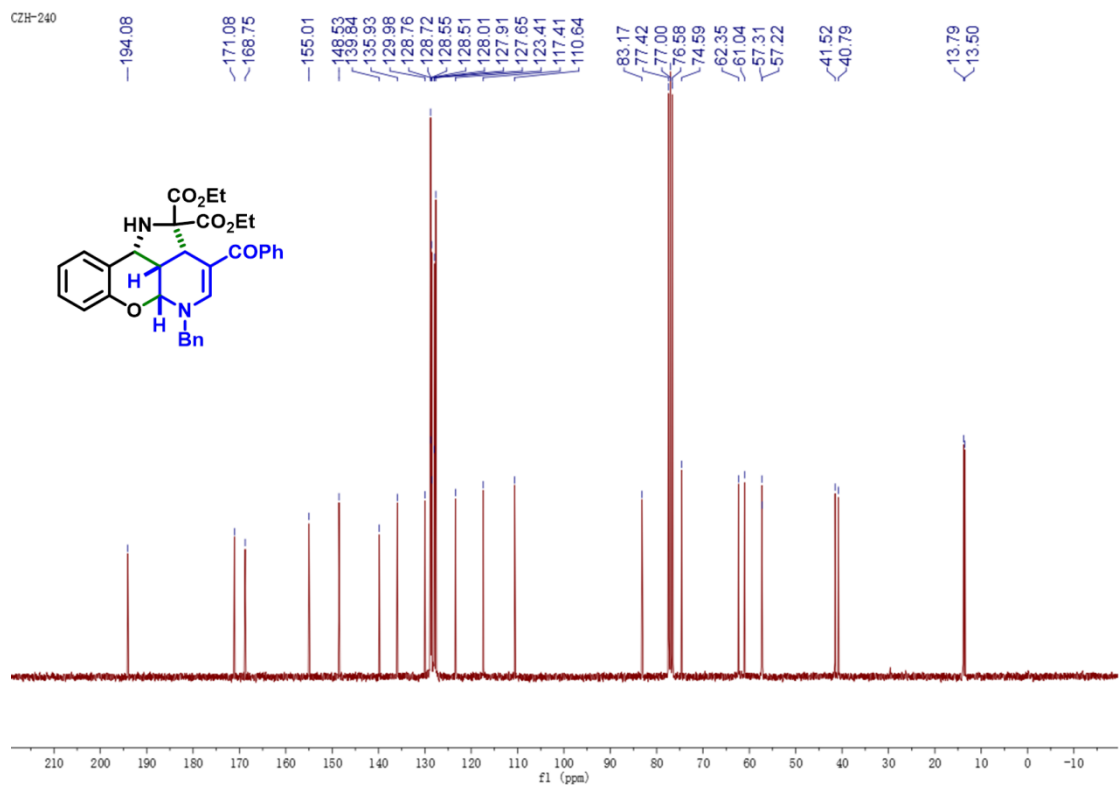

<sup>1</sup>H NMR spectrum of **3y** (300 MHz, CDCl<sub>3</sub>)

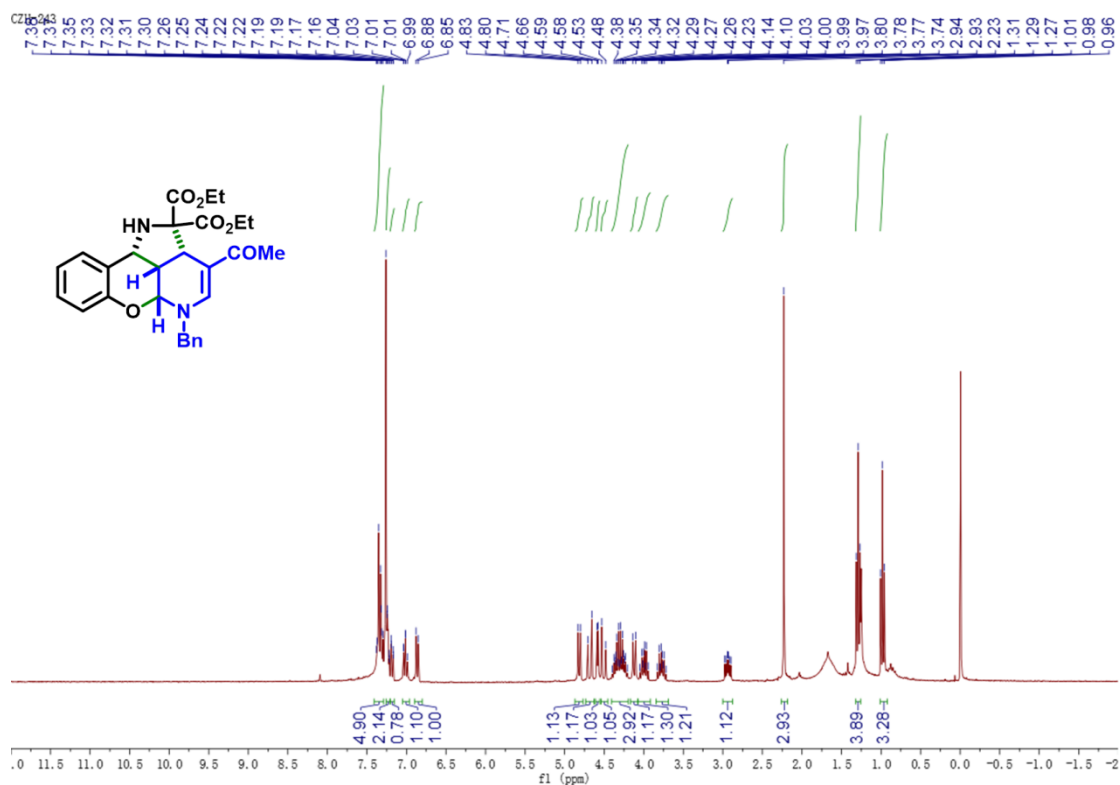

<sup>13</sup>C NMR spectrum of **3y** (75 MHz, CDCl<sub>3</sub>)

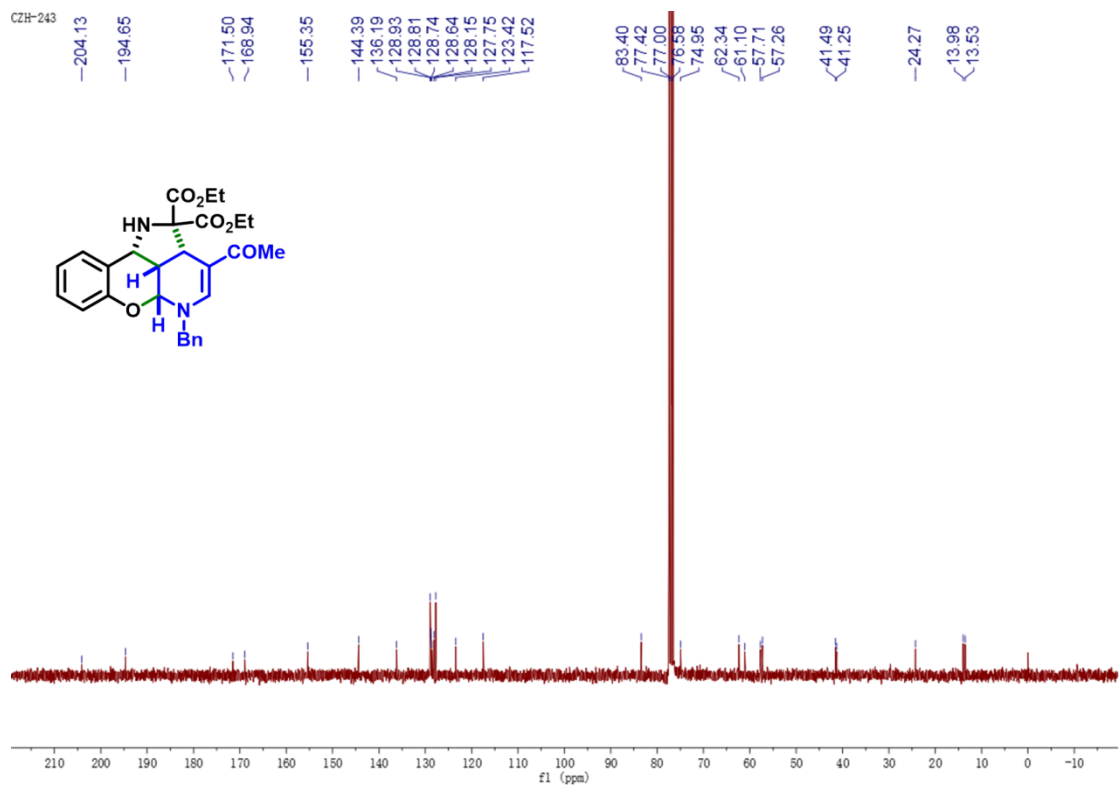

<sup>1</sup>H NMR spectrum of **3z** (300 MHz, CDCl<sub>3</sub>)

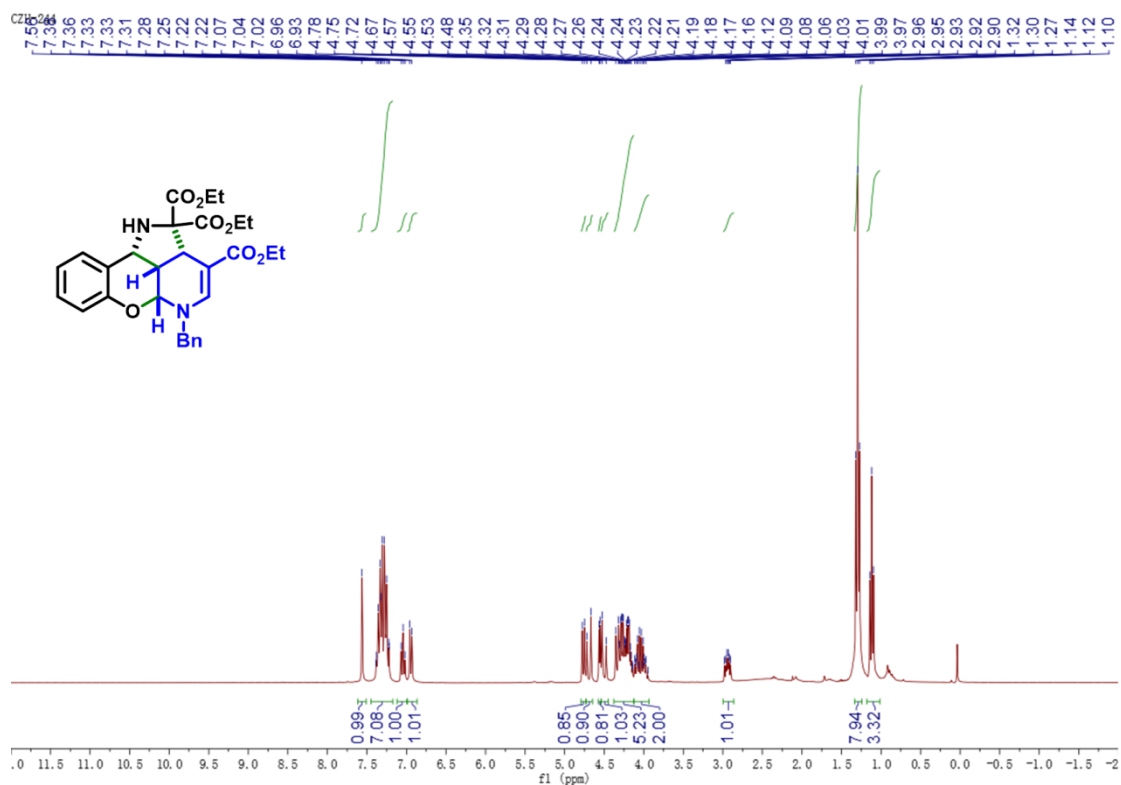

<sup>13</sup>C NMR spectrum of **3z** (75 MHz, CDCl<sub>3</sub>)

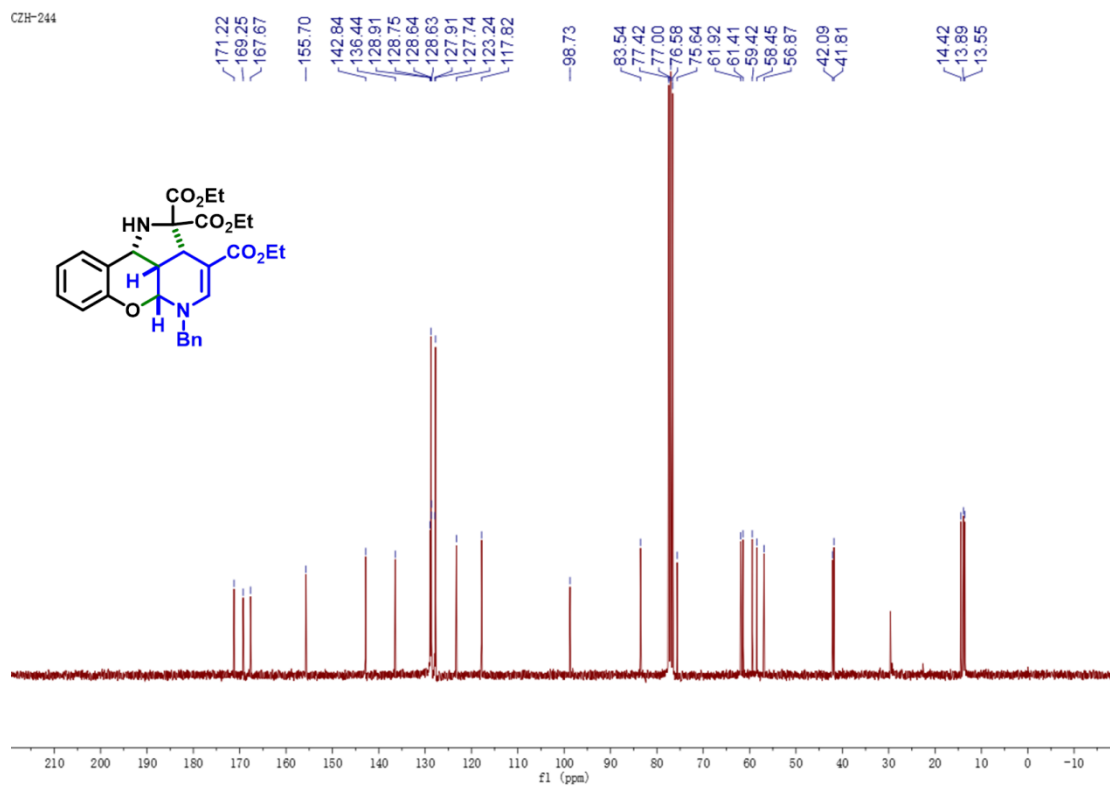



<sup>1</sup>H NMR spectrum of **3aa** (400 MHz, CDCl<sub>3</sub>)

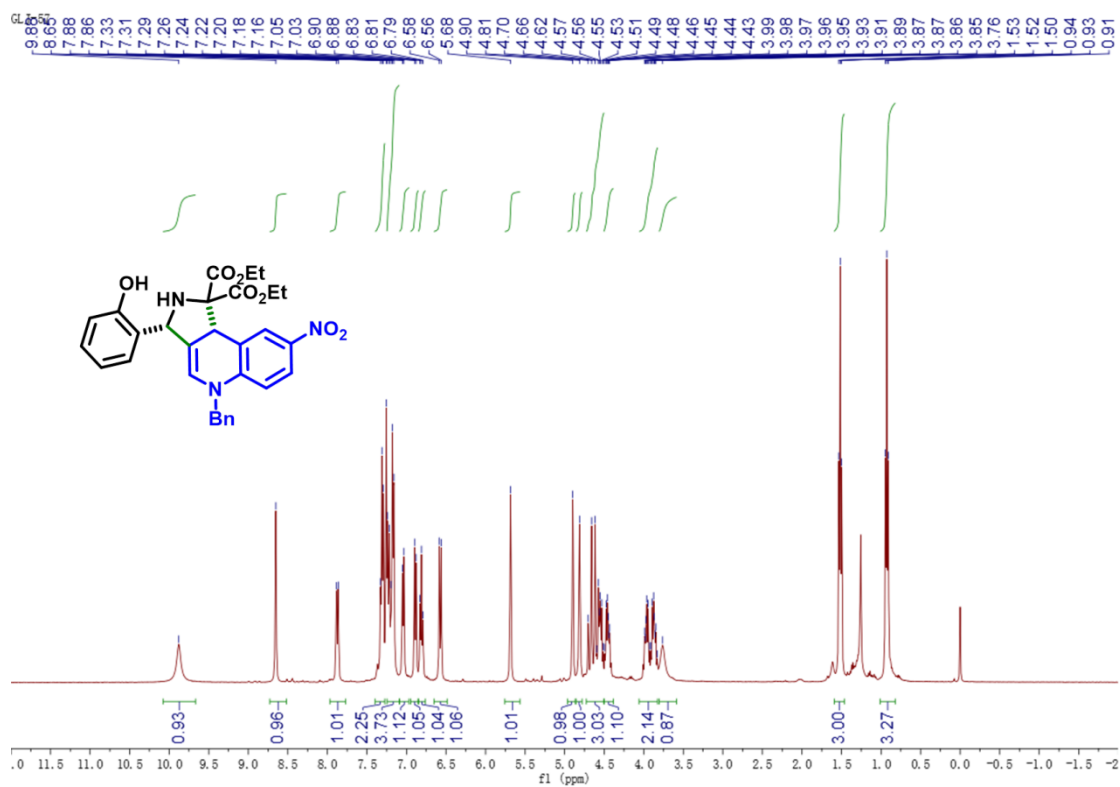

<sup>13</sup>C NMR spectrum of **3aa** (100 MHz, CDCl<sub>3</sub>)

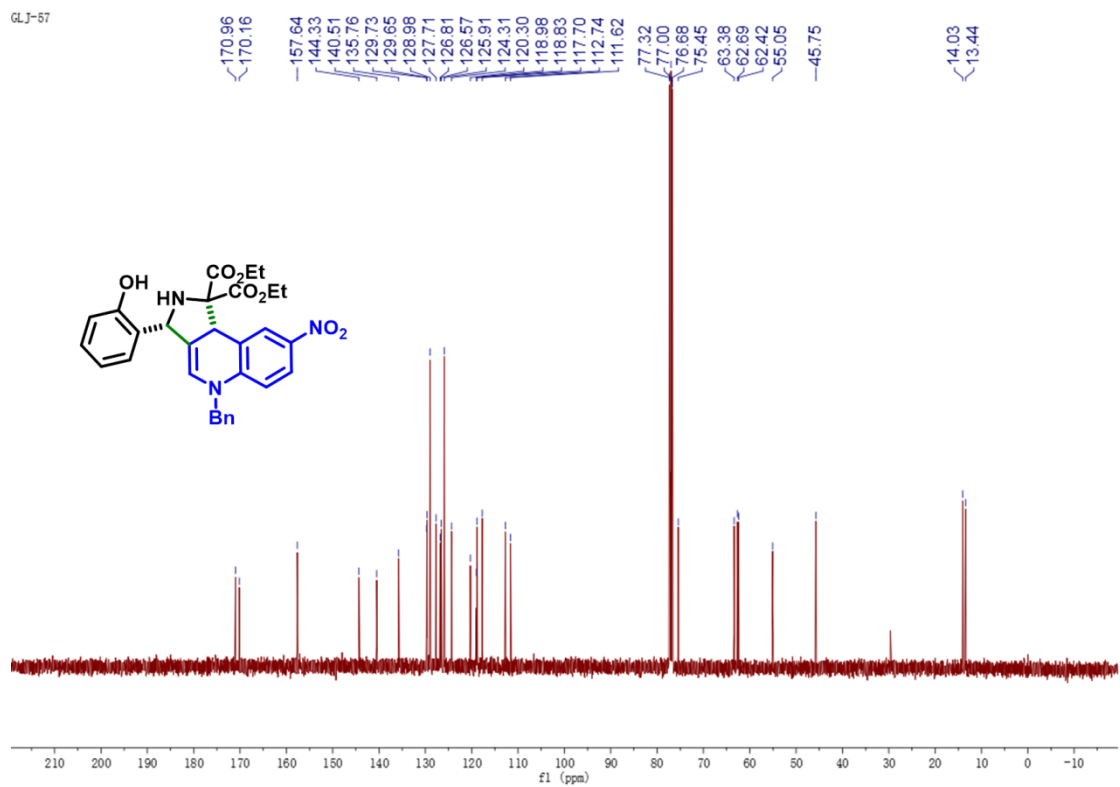

<sup>1</sup>H NMR spectrum of **3ab** (300 MHz, CDCl<sub>3</sub>)

CZH-239

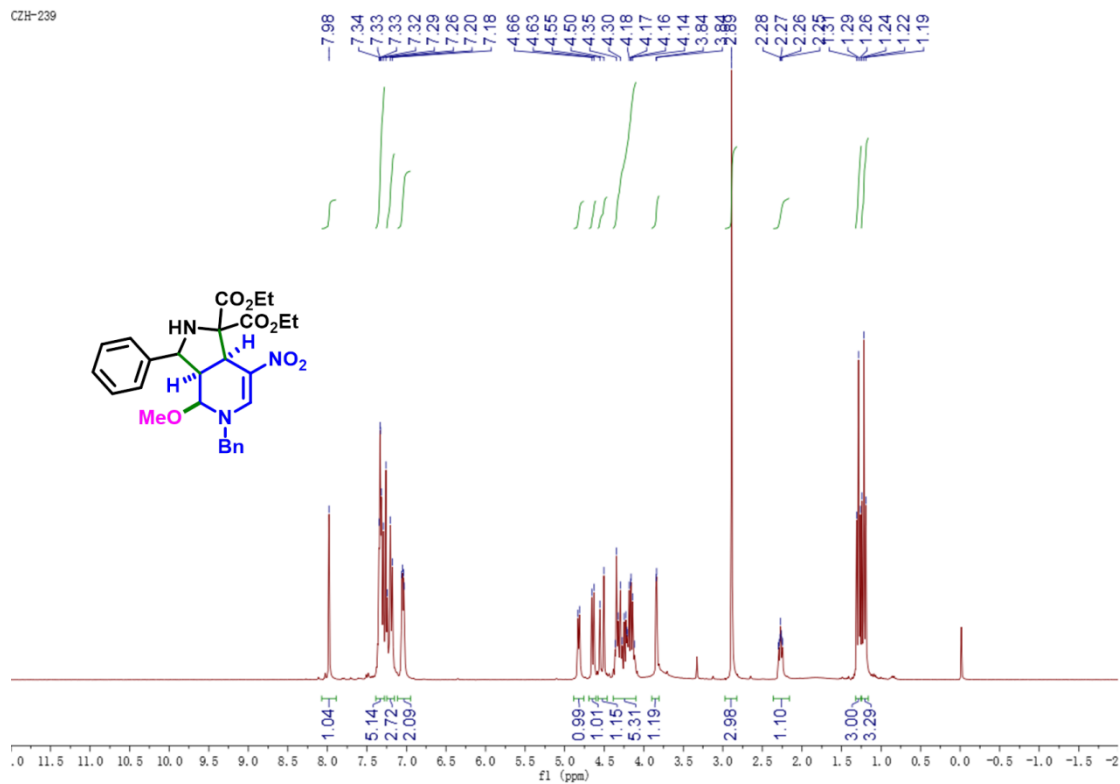

<sup>13</sup>C NMR spectrum of **3ab** (75 MHz, CDCl<sub>3</sub>)

CZH-239

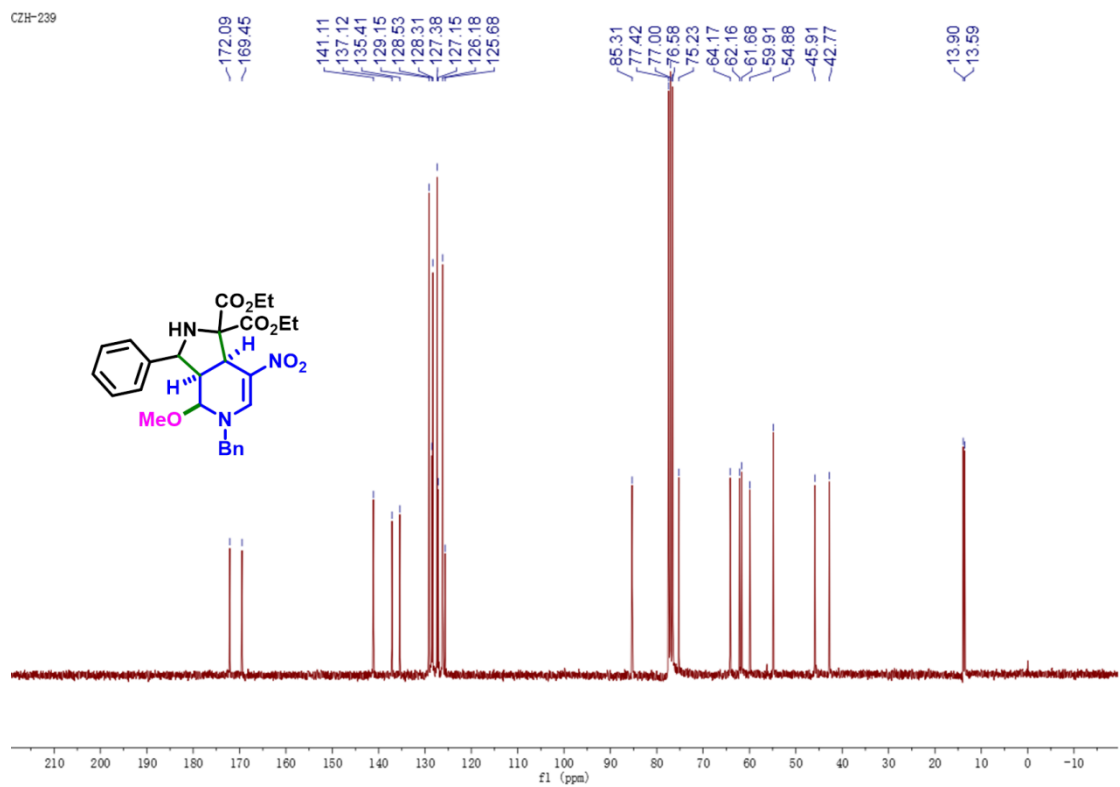

$^1\text{H}$  NMR spectrum of **3ab'** (300 MHz,  $\text{CDCl}_3$ )

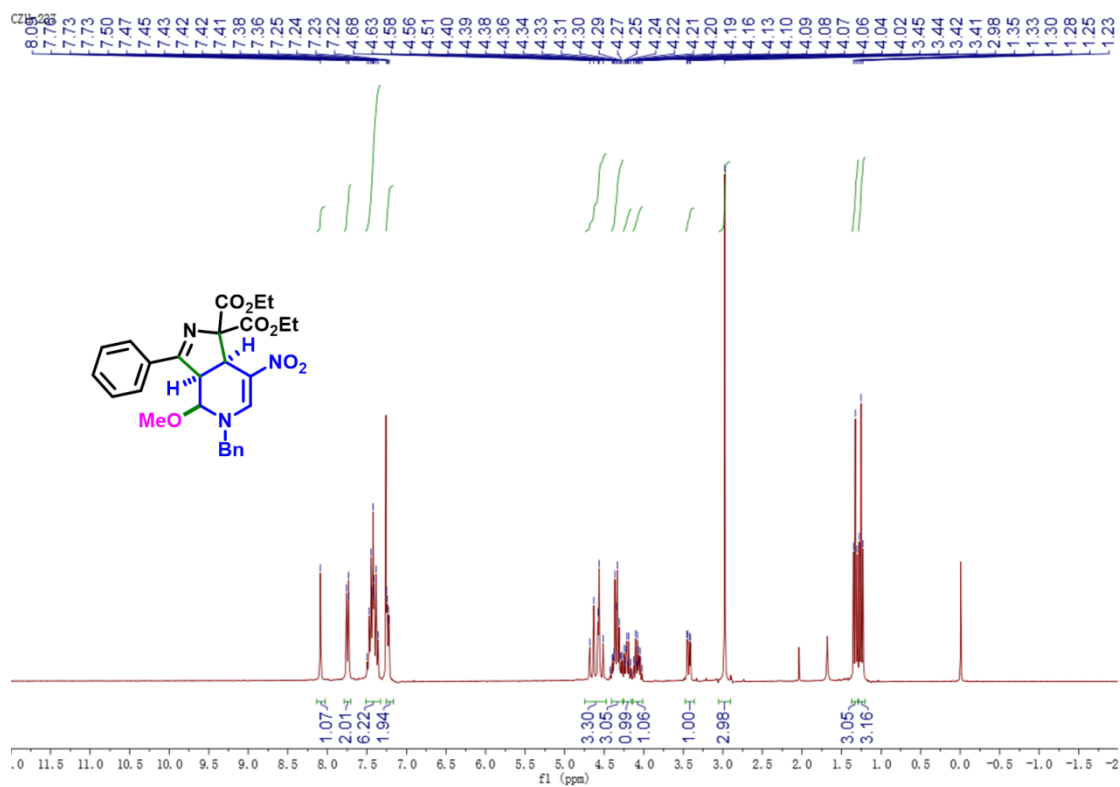

$^{13}\text{C}$  NMR spectrum of **3ab'** (75 MHz,  $\text{CDCl}_3$ )

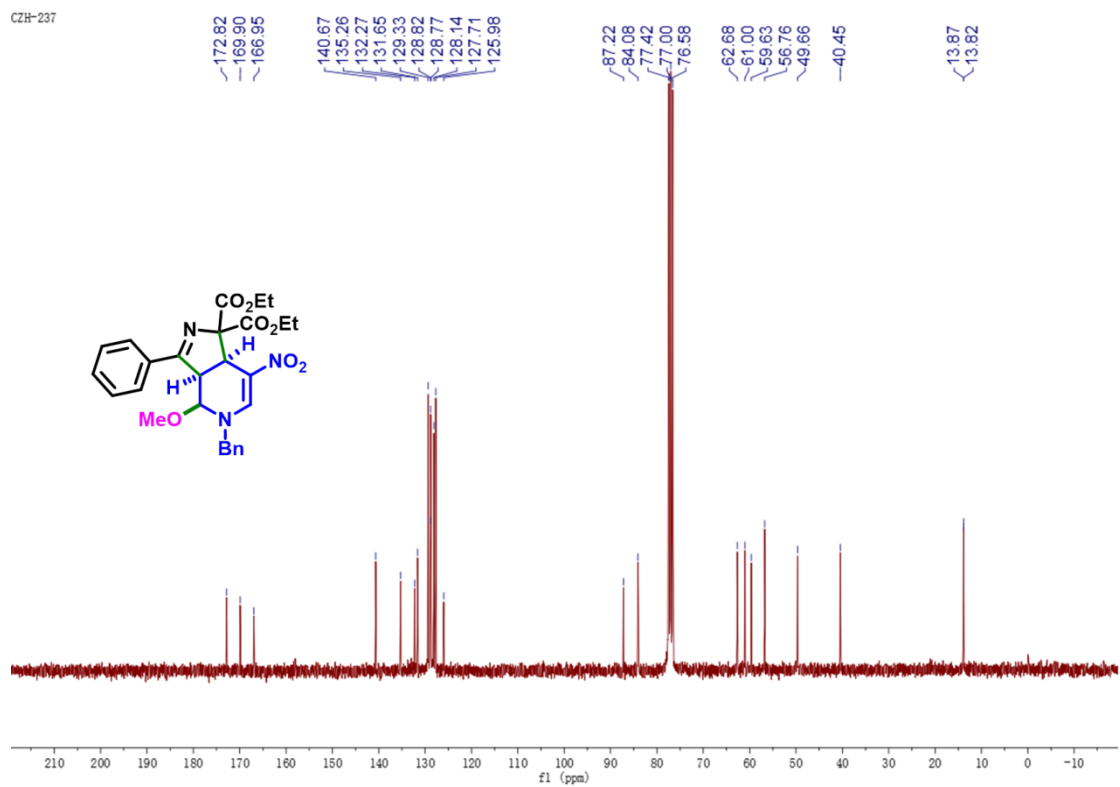

<sup>1</sup>H NMR spectrum of **4** (400 MHz, CDCl<sub>3</sub>)

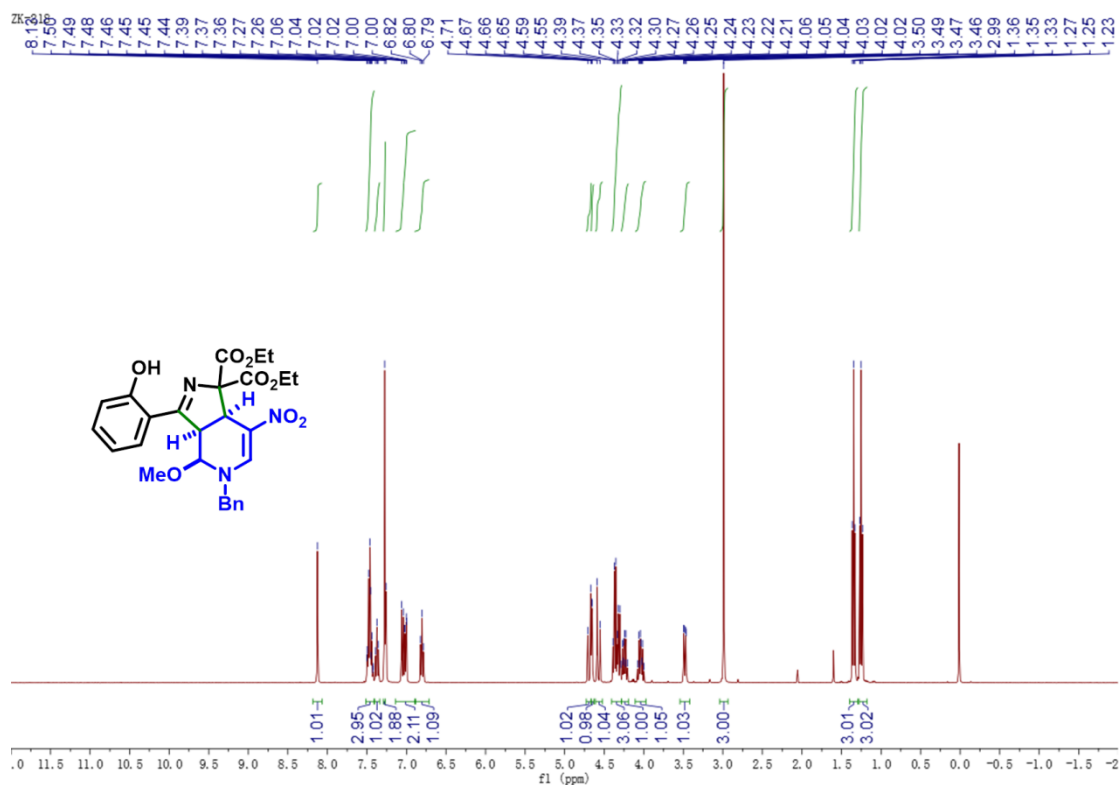

<sup>13</sup>C NMR spectrum of **4** (100 MHz, DMSO-*d*<sub>6</sub>)

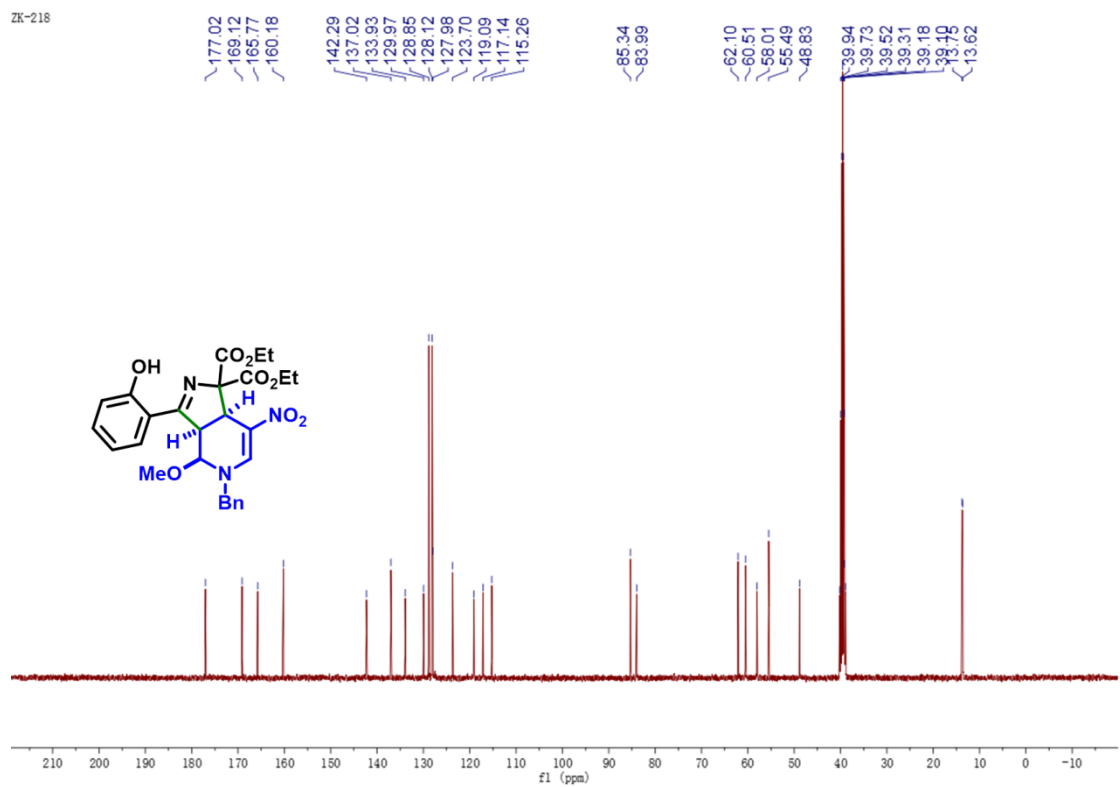

<sup>1</sup>H NMR spectrum of **5** (400 MHz, CDCl<sub>3</sub>)

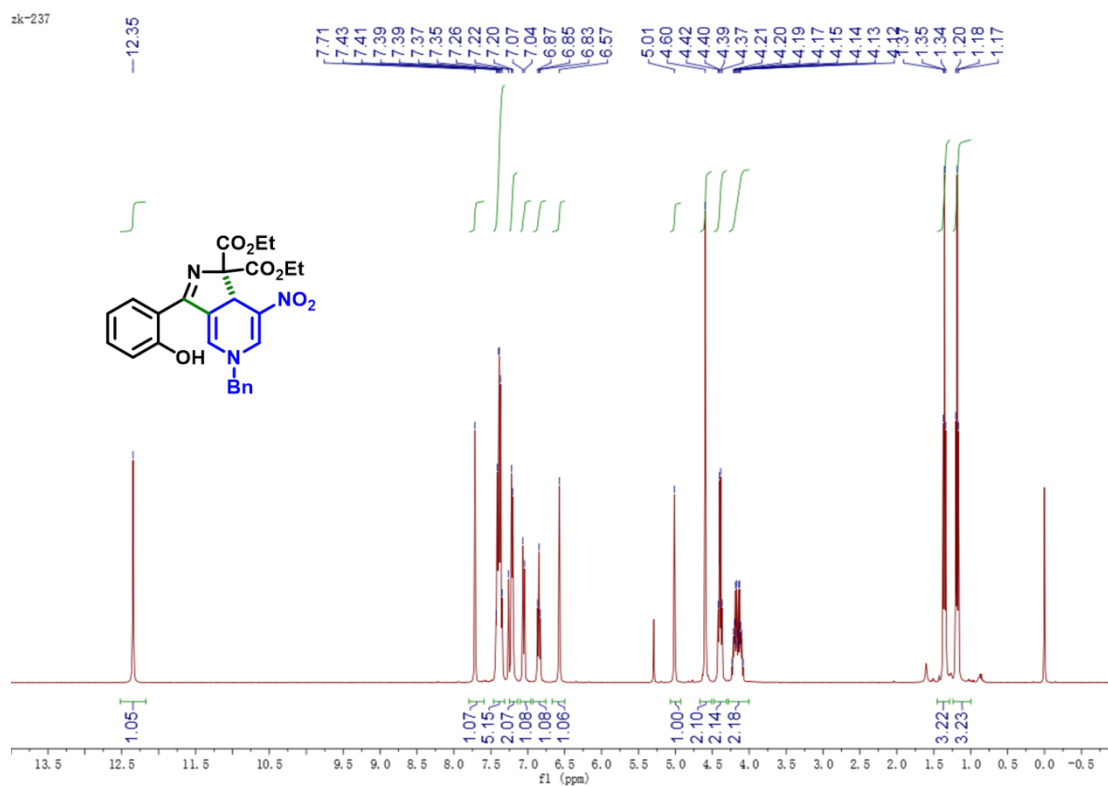

<sup>13</sup>C NMR spectrum of **5** (100 MHz, CDCl<sub>3</sub>)

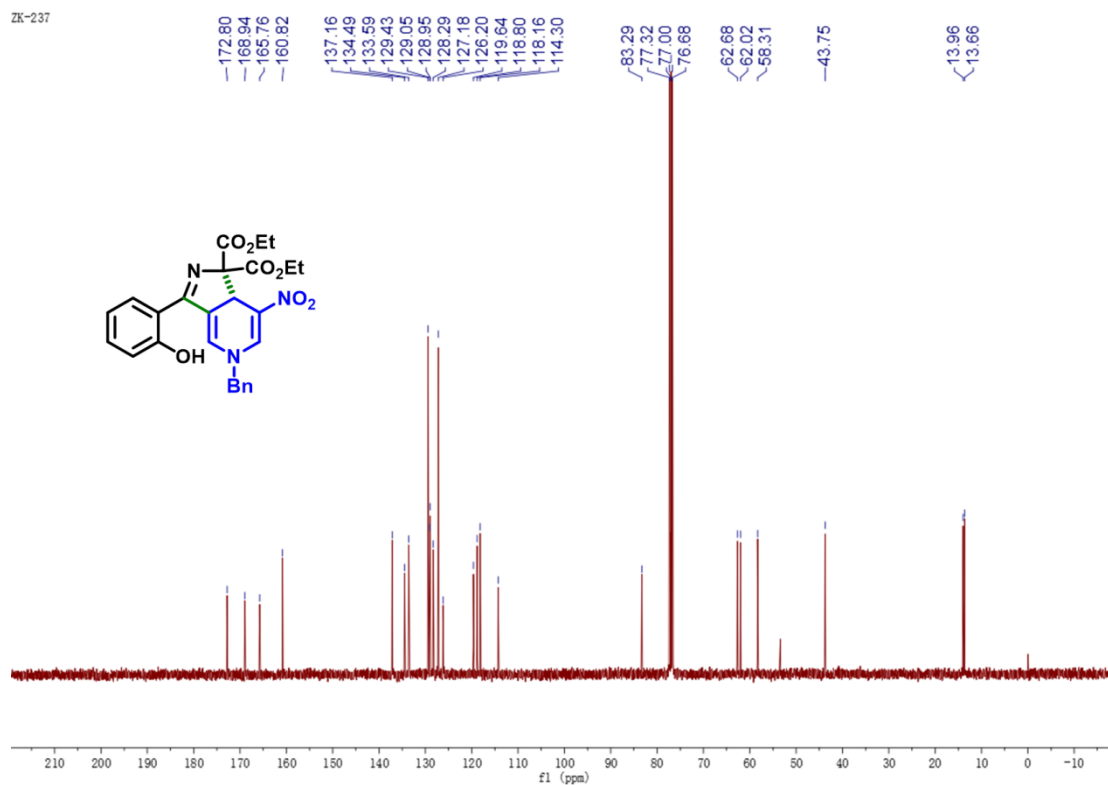

<sup>1</sup>H NMR spectrum of **6** (400 MHz, CDCl<sub>3</sub>)

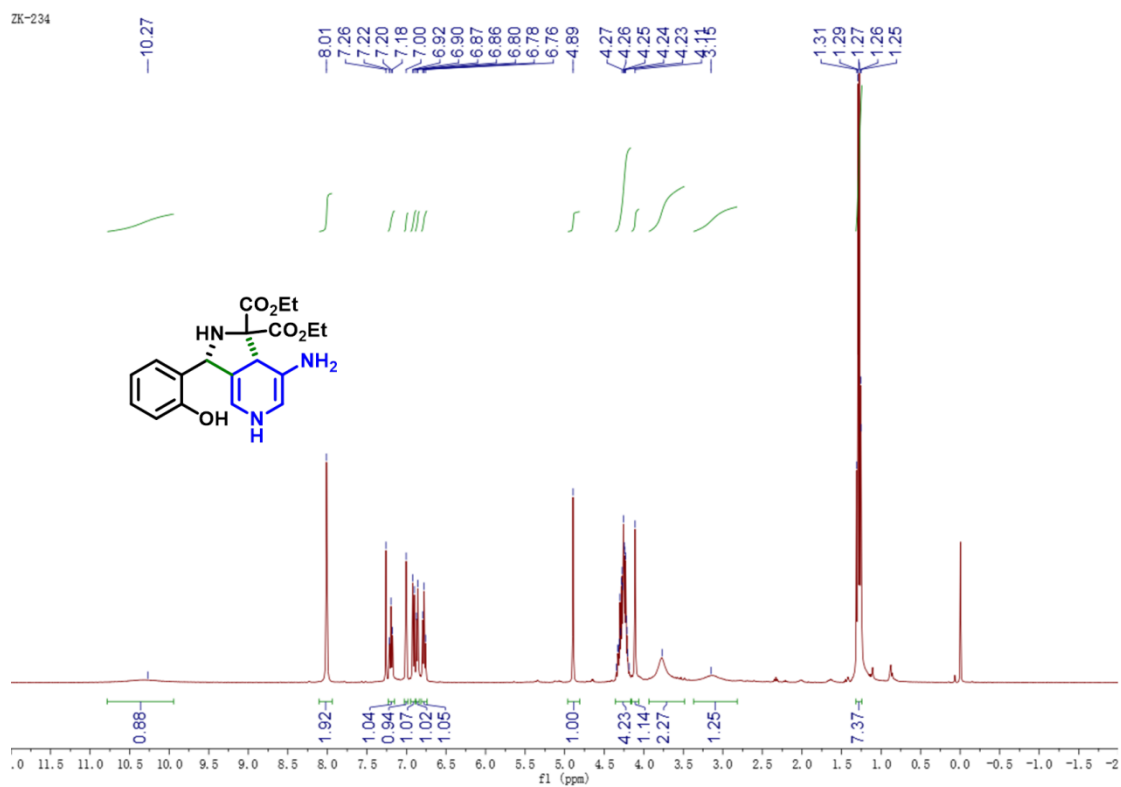

<sup>13</sup>C NMR spectrum of **6** (100 MHz, CDCl<sub>3</sub>)

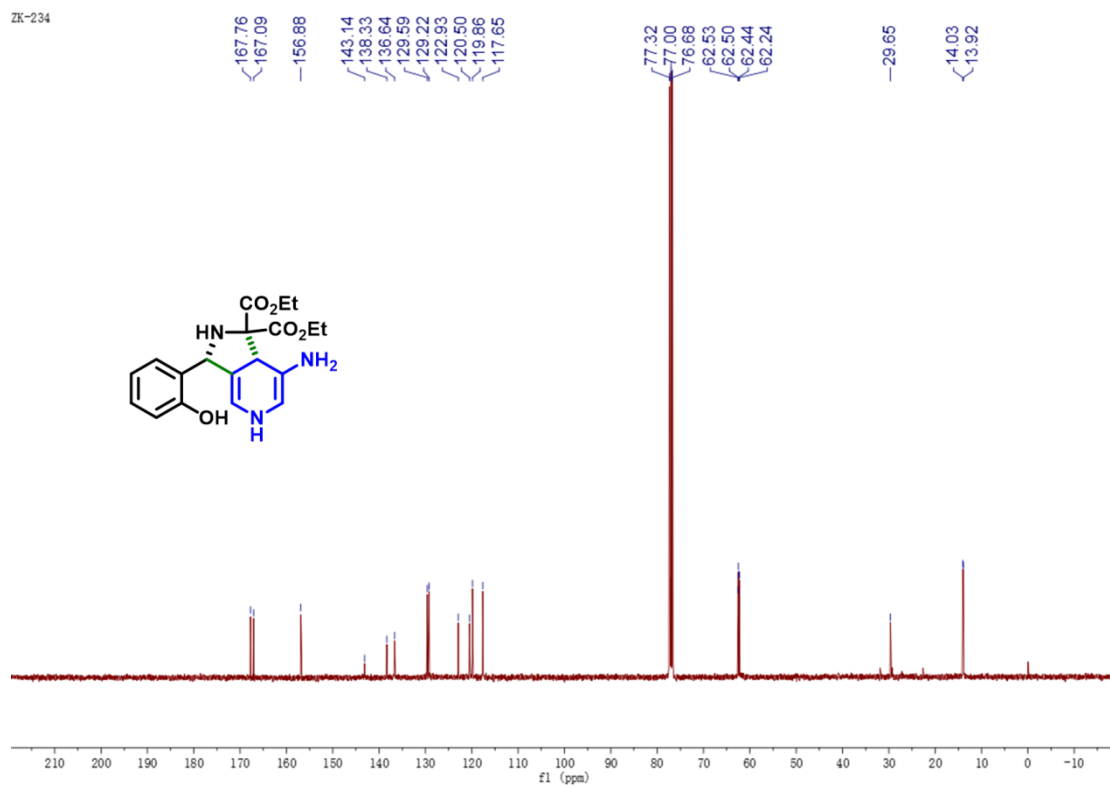

<sup>1</sup>H NMR spectrum of **7** (400 MHz, DMSO-*d*<sub>6</sub>, CDCl<sub>3</sub>)

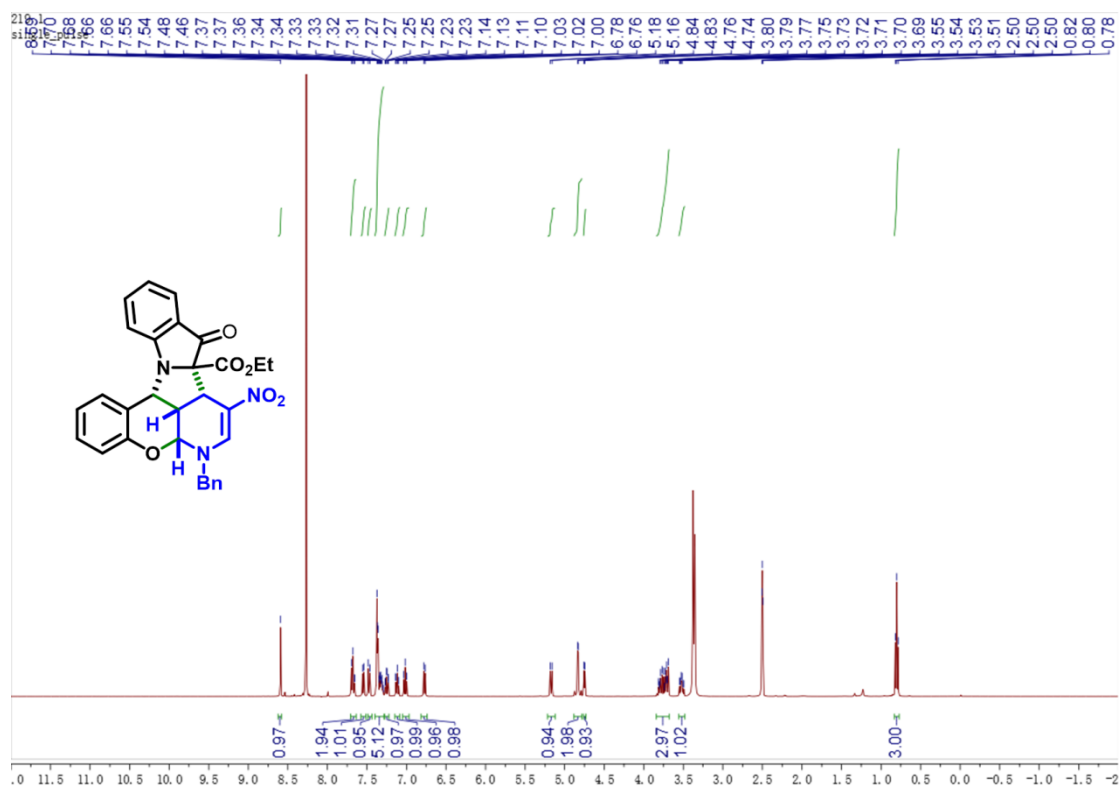

<sup>13</sup>C NMR spectrum of **7** (100 MHz, DMSO-*d*<sub>6</sub>, CDCl<sub>3</sub>)

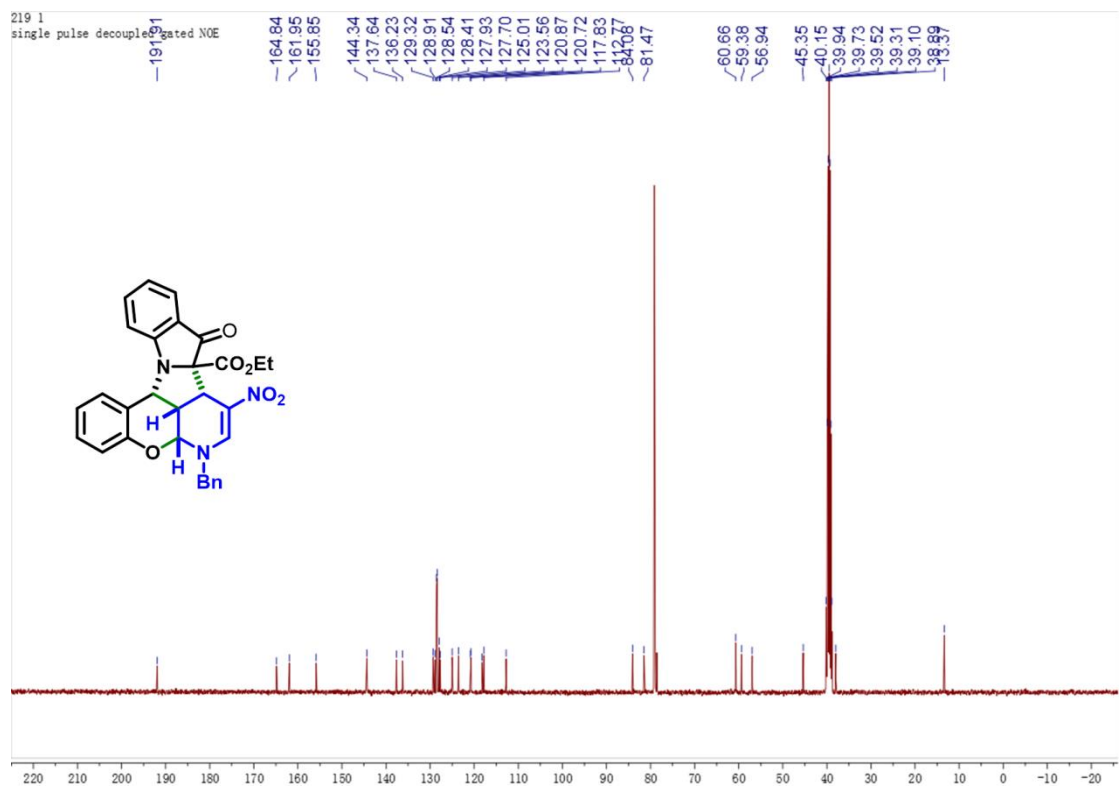

<sup>1</sup>H NMR spectrum of **8** (400 MHz, CDCl<sub>3</sub>)

CZH-190

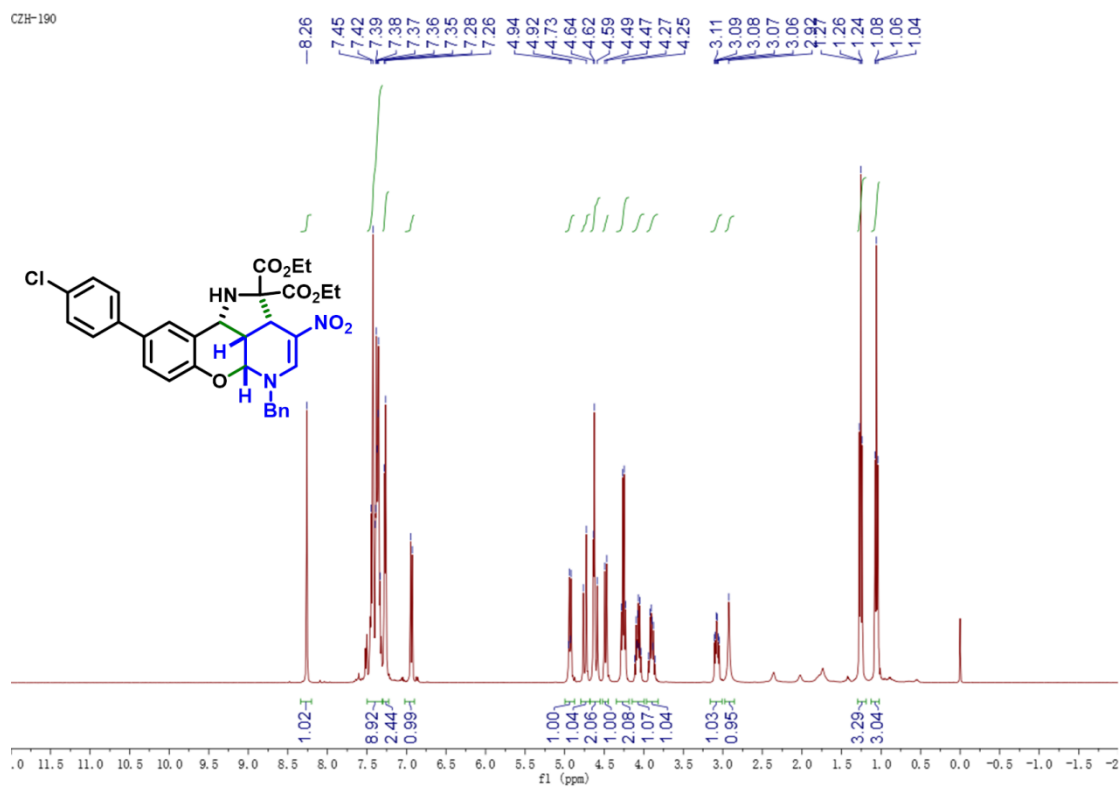

<sup>13</sup>C NMR spectrum of **8** (100 MHz, CDCl<sub>3</sub>)

CZH-190

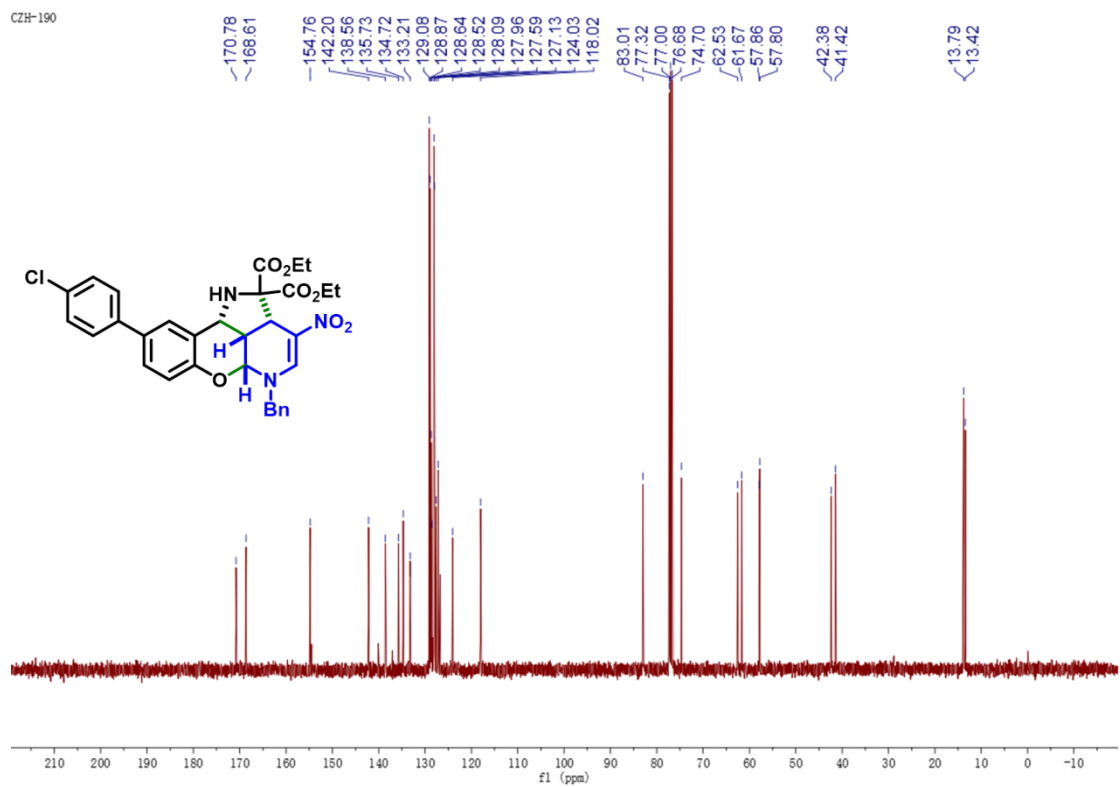



<sup>1</sup>H NMR spectrum of **9** (400 MHz, CDCl<sub>3</sub>)

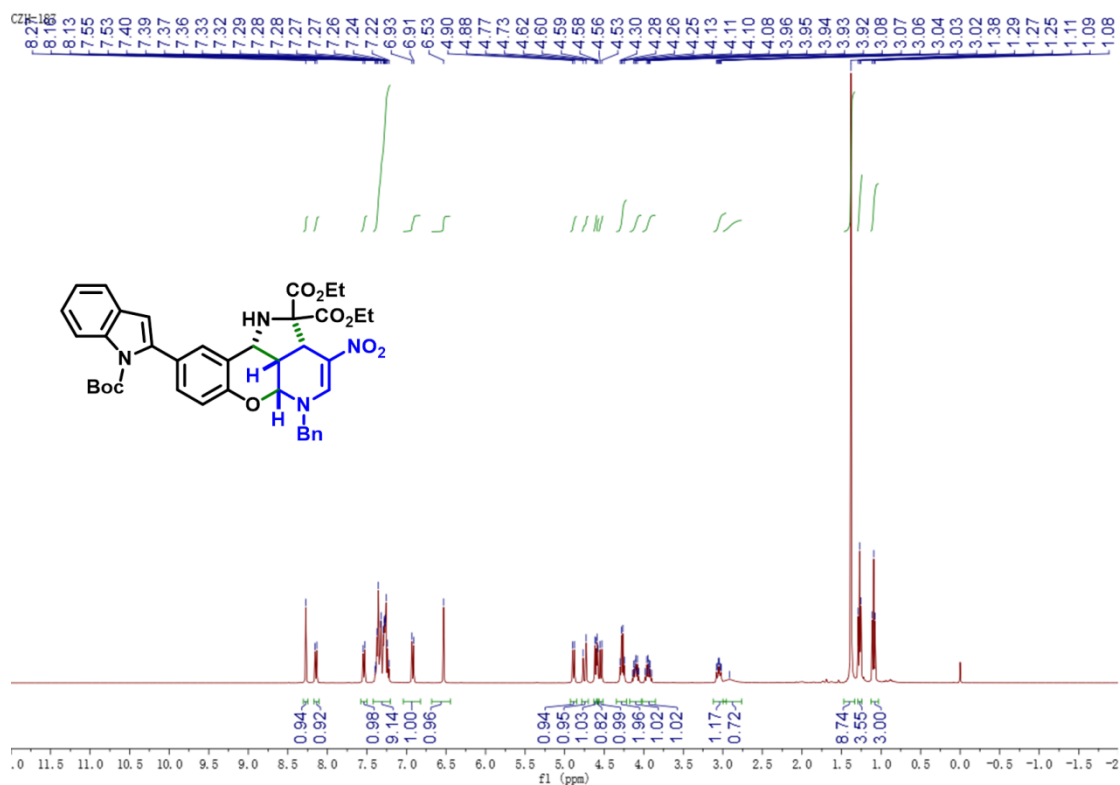

<sup>13</sup>C NMR spectrum of **9** (100 MHz, CDCl<sub>3</sub>)

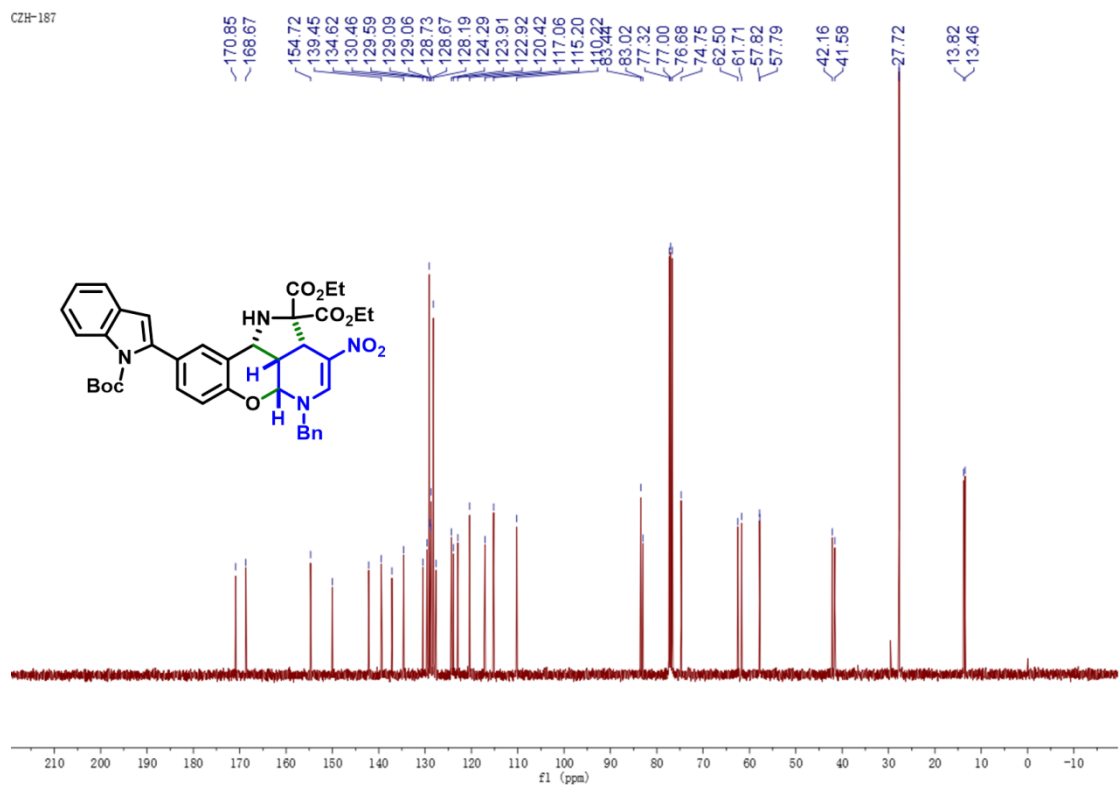

<sup>1</sup>H NMR spectrum of **10** (400 MHz, CDCl<sub>3</sub>)

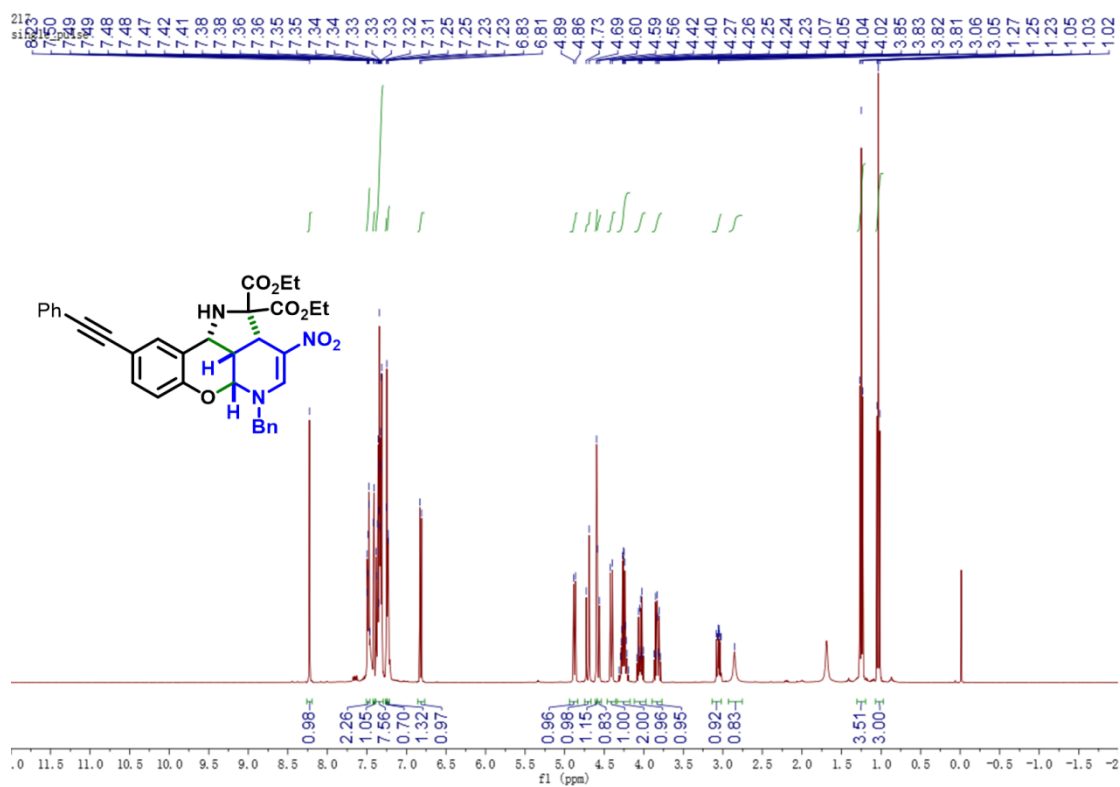

<sup>13</sup>C NMR spectrum of **10** (100 MHz, CDCl<sub>3</sub>)

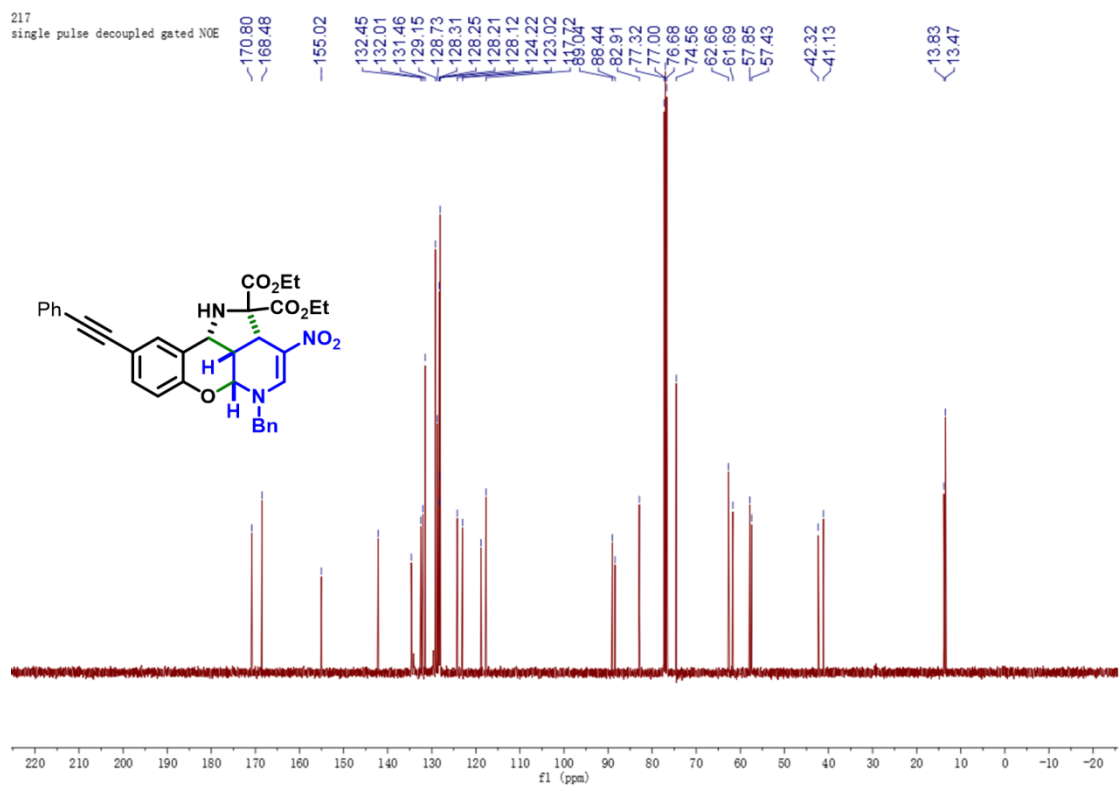

Supplement: d1cc03478b1.pdf [file d1cc03478b1.pdf]
